1 **The pH-dependent processivity of Arabidopsis AtPME2 can control cell wall mechanical**  
2 **properties**

3  
4 Ludivine Hocq<sup>1§</sup>, Olivier Habrylo<sup>1¥</sup>, Aline Voxeur<sup>1#</sup>, Corinne Pau-Roblot<sup>1</sup>, Josip Safran<sup>1</sup>,  
5 Fabien Sénéchal<sup>1</sup>, Françoise Fournet<sup>1</sup>, Solène Bassard<sup>1</sup>, Virginie Battu<sup>2</sup>, Hervé Demailly<sup>3</sup>,  
6 José C. Tovar<sup>4†</sup>, Serge Pilard<sup>5</sup>, Paulo Marcelo<sup>6</sup>, Brett J. Savary<sup>4</sup>, Davide Mercadante<sup>7</sup>, Maria  
7 Fransiska Njo<sup>8,9</sup>, Tom Beeckman<sup>8,9</sup>, Arezki Boudaoud<sup>2</sup>, Jérôme Pelloux<sup>1\*</sup>, Valérie Lefebvre<sup>1\*</sup>

8  
9 <sup>1</sup> : UMRT INRAE 1158 BioEcoAgro – BIOPI Biologie des Plantes et Innovation, SFR  
10 Condorcet FR CNRS 3417, Université de Picardie, 33 Rue St Leu, 80039 Amiens, France. <sup>2</sup> :  
11 Laboratoire Reproduction et Développement des Plantes, UMR 5667, ENS de Lyon, BP 7000  
12 69342 Lyon Cedex 07 France. <sup>3</sup> : CRRBM, Université de Picardie, 33 Rue St Leu, 80039  
13 Amiens, France. <sup>4</sup> : Arkansas Biosciences Institute, Arkansas State University, Jonesboro, AR  
14 72467, USA. <sup>5</sup> : Plateforme Analytique, Université de Picardie, 33 Rue St Leu, 80039 Amiens,  
15 France. <sup>6</sup> : Plateforme d'Ingénierie cellulaire et d'Analyses des Protéines, CURS, Avenue  
16 Laënnec - 80054 Amiens cedex 1, Université de Picardie. <sup>7</sup> : School of Chemical Sciences,  
17 The University of Auckland, Private Bag 92019, Auckland 1142, New Zealand. <sup>8</sup> : Ghent  
18 University, Department of Plant Biotechnology and Bioinformatics, 9052 Ghent, Belgium. <sup>9</sup> :  
19 VIB Center for Plant Systems Biology, 9052 Ghent, Belgium.

20  
21 <sup>§</sup> Present address : UMR1121 Laboratoire Agronomie et Environnement, Université de  
22 Lorraine – INRAE, 2 Avenue de la Forêt de Haye, 54505 Vandoeuvre les Nancy, France

23 <sup>¥</sup> Present address: Centre de Recherche et Innovation Soufflet, 1 rue de la Poterne à Sel,  
24 10400 Nogent sur Seine, France

25 <sup>#</sup> Present address: INRAE, Institut Jean-Pierre Bourgin, UMR1318 INRAE-AgroParisTech,  
26 ERL3559 CNRS, Saclay Plant Sciences, 78026 Versailles, France

27 <sup>†</sup> Present address: Donald Danforth Plant Science Center, 975 N. Warson Rd., St. Louis, MO  
28 63132, USA

29  
30 \*: contributed equally to the work as senior authors.

31

32 **Corresponding author:**

33 J.P and V.L.: EA3900-BIOPI, Université de Picardie Jules Verne, Amiens, France.

34 jerome.pelloux@u-picardie.fr

35 valerie.lefevre@u-picardie.fr

36 **Running title:**

37 AtPME2 has a pH-dependent processivity

38

39 **Abstract (195 Words)**

40

41 Pectin methylesterases (PMEs) modify homogalacturonan's chemistry and thereby  
42 play a key role in regulating primary cell wall mechanical properties. How PME activity can  
43 fine-tune pectin structure in the growing plant has remained elusive, in part due to the lack of  
44 available biochemically-characterized enzymes to empirically test functional properties. Here  
45 we report on AtPME2, which we found to be highly expressed during lateral root emergence  
46 as well as root and hypocotyl elongation. Production of mature active enzyme in *Pichia*  
47 *pastoris* allowed its biochemical characterization. We show that AtPME2 can switch from full  
48 processivity (at pH 8), creating large blocks of unmethylated galacturonic acid, to low  
49 processivity (at pH 5) and relate these observations to the differences in electrostatic potential  
50 of the protein. We also produced a generic plant PME antiserum suitable for detecting  
51 recombinant and native enzyme independent of species source. In the context of acidified  
52 apoplast, we showed using reverse genetics that low-processive demethylesterification by  
53 AtPME2 can loosen the cell wall, with consequent increase in cell elongation and etiolated  
54 hypocotyl length. Our study brings insights into how the pH-dependent regulation by PME  
55 activity could affect pectin structure and associated cell wall mechanical properties in  
56 expansion.

57

58

## 59 Introduction

60  
61 How plants control pectin's chemistry in cell walls is a central question in plant  
62 growth and development and in plant response to abiotic and biotic stresses. Pectins are  
63 complex polysaccharides that function as key structural elements regulating the mechanical  
64 properties of plant cell walls. Pectins are enriched in galacturonic acid and comprise four  
65 main domains: homogalacturonan (HG), rhamnogalacturonan-I (RG-I), rhamnogalacturonan-  
66 II (RG-II) and xylogalacturonan (XG). One key feature of HG chemistry, a homopolymer of  
67  $\alpha$ -1,4-linked-D-galacturonic acid units, is the presence of methyl- and acetyl-ester  
68 substitutions along the polymer chain that modify its physical, chemical, and biochemical  
69 properties (Ridley *et al.*, 2001). Plants synthesize HG as a highly methylesterified form (up to  
70 80% methyl esters, occurring at the C-6 carboxyl position) and a low acetylated form (up to 5-  
71 10% acetyl ester, occurring at the O-2 or O-3 positions) in the Golgi apparatus, before being  
72 exported to the apoplastic space. The degree of methylesterification (DM) and degree of  
73 acetylation (DA) as well as distribution of these substitutions on the backbone are fine-tuned  
74 at the cell wall by pectin methylesterases (PMEs, EC 3.1.1.11) and pectin acetylerases  
75 (PAE, EC 3.1.1.6), respectively (Pelloux *et al.*, 2007). Pectin methylesterase action on HG is  
76 tightly regulated biochemically by proteinaceous inhibitors called pectin methylesterase  
77 inhibitors (PMEIs) or by pH and cations (Micheli, 2001). Resulting activity can introduce  
78 extensive de-methylesterified HG blocks that can bind  $\text{Ca}^{2+}$  ions cooperatively, creating so  
79 called "egg-box" cross-link structures that promote cell wall rigidity (Willats *et al.*, 2006).  
80 Limited de-methylesterified blocks may also provide substrate-binding sites for pectin-  
81 depolymerizing enzymes such as polygalacturonases (endo-PGs, EC 3.2.1.15) and  
82 pectin/pectate lyases-like (PLLs EC 4.2.2.2), which reduce HG's degree of polymerization  
83 (DP) and promotes the pectic network's deconstruction (Sénéchal, Wattier, *et al.*, 2014).  
84 Therefore, to relate the consequences of PME action on pectin substrates to changes in the  
85 cell wall's elasticity, it is key to determine their degree of processivity (*i.e.*, the extent PME  
86 hydrolyzes consecutive methylesters).

87 Plants are well described for expressing multiple PME isoforms with individual  
88 isozymes varying in tissue-specific expression patterns, biochemical properties, and action  
89 patterns. PMEs thereby likely function differentially in the cell wall during plant growth and  
90 development (Goldberg *et al.*, 1996; Micheli, 2001; Pelloux *et al.*, 2007). PMEs were indeed  
91 reported to play a key role in developmental processes as diverse as hypocotyl elongation  
92 (Pelletier *et al.*, 2010), pollen tube growth (Leroux *et al.*, 2015), root development (Hewezi *et*

93 *al.*, 2008), organogenesis at the shoot apical meristem (Peaucelle *et al.*, 2008; Peaucelle *et al.*,  
94 2011), and gynoecium development (Andres-Robin *et al.*, 2018). Contradictory reports  
95 showed that PME activity can either induce cell wall stiffening or loosening, with distinct  
96 consequences on plant development (Peaucelle *et al.*, 2015; Daher *et al.*, 2018; Wang *et al.*,  
97 2020). This could at least partly be explained by the demethylation pattern that different PME  
98 isoforms would create in relation to their processivity which could be regulated by the local  
99 cell wall microenvironment, including ion concentrations, apoplastic pH, enzyme's  
100 localization, and presence of inhibitory proteins.

101 Because plant PMEs are encoded by large multigenic family (e.g., 66 genes in  
102 *Arabidopsis*; Sénéchal, Wattier, *et al.*, 2014), there is need to determine the expression profile  
103 and degree of processivity of individual isoforms to assess their potential for generating HG  
104 micro-domains that differ in de-methylesterified block sizes. Such micro-domains were  
105 recently reported to play a key role in determining the control of mucilage release in  
106 *Arabidopsis* seeds through interaction with peroxidases (Francoz *et al.*, 2019). Plant PMEs  
107 typically have neutral to alkaline pH activity optimum (Jolie *et al.*, 2010; Dixit *et al.*, 2013)  
108 although few acidic isoforms are reported (Lin *et al.*, 1989; Thonar *et al.*, 2006). It is  
109 generally recognized that plant and microbial PMEs differ in their processivity. Plant and  
110 bacterial PMEs produce large blocks of demethylesterified HG by processive action, while  
111 fungal enzymes act more randomly on their substrate to provide single or limited consecutive  
112 demethylesterifications (Mercadante *et al.*, 2013; Mercadante *et al.*, 2014; Sénéchal *et al.*,  
113 2015; Kent *et al.*, 2016; Fries *et al.*, 2007). The structural determinants for differences in  
114 processivity were determined (Mercadante *et al.*, 2014; Kent *et al.*, 2016), with key  
115 suggestions about the role of charged residues in certain subsites of the enzyme binding  
116 groove, and the interplay of electrostatic *versus* hydrophobic contacts in favoring substrate-  
117 binding and sliding along the groove to achieve processivity (Mercadante *et al.*, 2014; Kent *et*  
118 *al.*, 2016; Fries *et al.*, 2007). The myriad of PME isoforms expressed in plants is however  
119 suggestive of a very fine regulation of the processive activity. The binding of certain  
120 methylation pattern and the enzymatic release after a certain number of de-  
121 methylesterification cycles are likely to be fine-tuned to modulate the physico-chemical  
122 properties of plant cell wall pectin in accordance to the micro-environment. PME processivity  
123 of an apple PME was shown to be pH-dependent, with a possible shift from a blockwise to  
124 non-blockwise mode of action (Denès *et al.*, 2000), and processive fungal PMEs were also  
125 reported (Markovič and Kohn, 1984). Considering such complexity of the PMEs' landscape,  
126 it is therefore paramount to adopt a more comprehensive approach in which biochemical data

127 are combined with structural and biophysical information of PME activity. Nevertheless,  
128 studying the crystal structure or mode of action of rare plant PMEs (i.e., low abundant  
129 proteins due to limited temporal and tissue-specific expression) has been impaired by the  
130 ability to produce purified native enzyme in quantities sufficient for refined structural studies.  
131 Routine heterologous expression of effectively folded plant PMEs has been challenging, thus  
132 their precise mode of action remains unresolved (Cheong *et al.*, 2019).

133 In higher plants, PMEs harbor two distinct protein structures: group 1 PMEs (21  
134 isoforms in *Arabidopsis*) that contain a mature active part (PME catalytic domain,  
135 Pfam01095) that can be preceded by a signal peptide or a transmembrane domain (Sénéchal,  
136 Wattier, *et al.*, 2014; Pelloux *et al.*, 2007; Markovič and Janeček, 2004), while group 2 PMEs  
137 (45 isoforms in *Arabidopsis*) have, in addition to the catalytic part, an N-terminal extension  
138 (PRO-domain) showing sequence similarities with the PME domain (Pfam04043), in  
139 addition to the catalytic domain.

140 We describe here for the first time that *Arabidopsis AtPME2* (At1g53830), encoding a  
141 group 2 PME is strongly expressed in dark-grown hypocotyls and roots, and that the protein  
142 localizes at the cell wall. We successfully expressed active *AtPME2* in the yeast *Pichia*  
143 *pastoris*, and using generic PME antibodies generated from a designed peptide immunogen,  
144 we show that the PRO-part is important for processing the enzyme into its mature active form.  
145 We further determined that *AtPME2* is more active on moderately to highly methylesterified  
146 pectic substrates, with a high processivity at neutral pH, while it shows a low degree of  
147 processivity in acidic conditions. And finally, using loss-of-function mutant plants for  
148 *AtPME2*, we showed that the enzyme may play a key role in controlling dark-grown  
149 hypocotyl development through modulating the cell wall's structural chemistry and  
150 mechanics. This study brings insights on how the differential expression of an individual  
151 *Arabidopsis* PME isoform having distinctive processivity for homogalacturonan may  
152 contribute to structural changes in the cell wall that affect plant development.

153

## 154 **Results**

155

### 156 ***AtPME2* gene is expressed in dark-grown hypocotyls and roots**

157

158 *AtPME2* (*At1g53830*) gene expression was followed using RT-qPCR transcript  
159 profiling in various organs (roots, dark-grown hypocotyls, leaves, stem, siliques, floral buds  
160 and seeds) and was found highly expressed in dark-grown hypocotyls and roots as compared  
161 to leaves, stem, floral buds and seeds. In contrast, no expression was detected in siliques  
162 (**Figure 1A**). During the time course of dark-grown hypocotyl development, an increase in  
163 *AtPME2* transcripts was measured up to 72 h post-induction (**Figure 1B**). This timing  
164 corresponds to the acceleration phase of growth according to previously published work  
165 (Pelletier *et al.*, 2010). In contrast, *AtPME2* was stably expressed in roots during seedling  
166 development in the light (**data not shown**).

167 *AtPME2* promoter activity was further localized using a *GUS* reporter gene. Following  
168 plant transformation, GUS staining was assessed in light-grown and 4 day-old dark-grown  
169 seedlings. In etiolated hypocotyls, the promoter activity was mainly localized in the upper part  
170 of the organ (**Figure 1C, left panel**). During lateral root formation, no GUS staining was  
171 detected in the early stages (stages I to V) of primordia differentiation, while a strong signal  
172 was observed at later stages (from VI onwards) (**Figure 1C, upper panel**). In elongating  
173 roots (either primary, lateral or adventitious), *AtPME2* promoter activity was mainly present  
174 in the elongation zone (**Figure 1C, lower panel**).

175

### 176 ***AtPME2* protein is present as a processed isoform in the cell wall**

177 Using proteomic profiling, we identified the pectin remodeling enzymes PME, PAE,  
178 PG, PLL and the regulatory proteins PME1 and SBT (subtilase) in cell wall-enriched protein  
179 fractions isolated from either 4-day-old hypocotyls (**Supplemental Table IA**) and 7-day-old  
180 roots (**Supplemental Table IB**), of Col-0 and WS ecotypes. In hypocotyls, these include  
181 *AtPME2* (AT1G53830) and two additional PME isoforms (AT3G14310, AT4G33220), as  
182 well as multiple PME1 proteins (AT2G43050; AT4G25260...), PAEs (AT2G46930,  
183 AT3G05910, AT5G45280...), PLLs (AT3G06770, AT3G07010, AT3G55140...) and SBTs  
184 (AT1G01900, AT1G20160, AT5G51750...) in both Col-0 and WS. Interestingly, some  
185 proteins were specifically identified in only one of the ecotypes (e.g., AT3G07010 in Col-0  
186 and AT3G09410, AT3G59010, AT5G20740, AT5G46960, AT5G62350 in WS). PME, PAE,  
187 PME1, PLL were identified in cell wall-enriched protein fractions of roots, but with some  
188 enzymes expressed only in one ecotype or the other. While some proteins (e.g., AT3G14310,



189 AT4G19410, AT3G16850...) were common with those identified in hypocotyls, others  
190 appeared to be specific to roots (e.g. AT1G32940, AT2G45220, AT4G34980...). Depending  
191 on the ecotype, the proteomic analysis matched 4 or 5 peptides predicted in the PME catalytic  
192 domain, accounting for 19% sequence coverage for AtPME2 (**Supplemental Figure 1 and**  
193 **Supplemental Table IA, B**). This survey confirmed that AtPME2 was indeed present in cell  
194 wall-enriched protein fractions of both organs, thus supporting transcriptional data. No  
195 peptides mapping to the PRO-domain were detected, consistent with AtPME2 being  
196 processed before export to the apoplast.

197 To further verify the secretion of AtPME2 in the apoplast, we designed a genetic  
198 construct tagging AtPME2 with GFP attached at the C-terminus of the mature protein  
199 sequence. Following plant transformation, confocal imaging of plasmolyzed root cells  
200 revealed GFP fluorescence was detected at both the cell wall and in the cytoplasm (**Figure**  
201 **1E**). This is consistent with AtPME2 translocation to the cell wall where it acts to fine-tune  
202 pectin structure and with previous reports relating nascent protein processing to the mature  
203 protein during transport in Golgi vesicles (Micheli, 2001).

204

### 205 **AtPME2 can be effectively produced and processed as an active isoform in *Pichia*** 206 ***pastoris***

207 To produce pure active enzyme for biochemical studies, we first attempted to directly  
208 express the catalytic domain without the PRO-peptide (PMEI-like domain) in *Pichia pastoris*.  
209 We amplified the putative coding sequence for the mature part, starting from KADA,  
210 downstream the second putative processing motif (RLLL, reported to be cleaved by the action  
211 of subtilisin-like proteases, removing the PRO regions and releasing active enzymes at the  
212 cell wall (Wolf et al., 2009)), up to the end of the sequence minus the stop codon  
213 (**Supplemental Figure 2B**, referred as “MAT” construct). This construct was cloned in frame  
214 with 6xHIS tag into the pPICZ  $\alpha$ B yeast expression vector, harboring a fungal secretory  
215 peptide. Following *Pichia* transformation, selection, and induction of transformants, we failed  
216 to detect any PME activity in concentrated supernatants. Considering the hypothesis that the  
217 PME domain functions as a chaperone during PME transport and processing (Micheli, 2001),  
218 we next inserted the full length AtPME2 coding sequence into the above-mentioned pPICZ  
219  $\alpha$ B vector, including its PRO-domain (but minus the plant secretory signal peptide and STOP  
220 codon, referred as “FL” construct, from ATTT to SLSL amino acids, **Supplemental Figure**  
221 **2A and 2B**) and transformed *Pichia pastoris*. PME activity was this time detected in  
222 concentrated supernatants of induced transformants. While we were unable to recover PME



223 activity after polyhistidine-tag affinity purification (presumably due to degradation of the  
224 affinity tag), we used cation exchange chromatography to purify the recombinant AtPME2,  
225 which is shown by SDS-PAGE (Coomassie-Blue stained gel) in **Figure 2A**. One band is  
226 present at ~30 kDa and two bands are observed at ~35 kDa, the latter corresponding to the  
227 approximate mass calculated from the sequence for the mature AtPME2 protein. The doublet  
228 is consistent with AtPME2 being cleaved at either of the processing motifs (RKLK and  
229 RRLL, see **Supplemental Figure 1 and 2B**) by *Pichia pastoris* subtilisin protease. The  
230 identity of AtPME2 mature protein was confirmed by mass spectrometry of the tryptic  
231 peptides, matching 12 peptides (**Supplemental Figure 3**). The lower protein, ~30 kDa,  
232 corresponds to the PRO-peptide, which was confirmed by matching 7 tryptic peptides  
233 (**Supplemental Figure 3**). Using the *Pichia* expression system, we were thus able to produce  
234 the mature active AtPME2 enzyme, as well as recover the PRO-peptide.

235 To support detection and identification of plant PME s such as AtPME2 in expression  
236 studies, we produced an antiserum that could be broadly selective for plant PME s (*i.e.*,  
237 generic for plants, independent of species source) in western blotting. For this we synthesized  
238 a peptide immunogen using a 15 amino acid peptide sequence (KTYLGRPWKEYSRTV) that  
239 spans the highly conserved region V in plant PME s and includes two invariant residues  
240 participating in the enzyme's catalytic site (Markovič and Janeček, 2004). Sequences  
241 alignment of 45 Arabidopsis PME catalytic domains (**Supplemental Figure 4A**) showed that  
242 this amino acid sequence is indeed highly conserved, notably in AtPME2 (AT1G53830,  
243 PTYLGRPWKEYSRTV) and AtPME3 (AT3G14310, PTYLGRPWKEYSQTV) sequences,  
244 two of the proteins identified both in hypocotyls and roots in our proteomic analyses. Western  
245 blot analyses to assess this generic PME antibody first examined previously purified PME  
246 isoforms isolated from citrus (CsTT-PME, CsPME2 and CsPME4) and tomato (SlPME1) fruit  
247 (Savary, 2001; Savary *et al.*, 2010; Savary *et al.*, 2013). The strong antiserum binding signal  
248 (dilution at 1:3000) indicates high affinity for all four PME s (**Figure 2B**). We similarly tested  
249 the antiserum against previously purified AtPME3 (Sénéchal *et al.*, 2015), which also showed  
250 strong binding (**Supplemental Figure 4B**), thus supporting the generic antiserum provides a  
251 new tool for analyzing Arabidopsis PME s.

252 To assess this generic antiserum's sensitivity for detecting PME s present in cell wall-  
253 enriched protein fractions, we performed western-bot analysis using Arabidopsis hypocotyl  
254 and root extracts. We detected antigen signals at approximately 35 kDa, which is consistent  
255 with the predicted size of fully processed (mature) PME (**Figure 2C**). Additional bands were  
256 detected above ~55 kDa, which may represent unprocessed PME precursor proteins isolated

257 from plant tissue extracts. No antigen signal was detected when using the pre-immune serum  
258 (**data not shown**). Finally, we performed western blot analysis to the recombinant AtPME2  
259 purified by cation-exchange chromatography and showed the generic antiserum strongly  
260 detected the two AtPME2 protein bands separated at molecular mass ~35 kDa (**Figure 2D**). A  
261 strong antigen band is observed in the western blot with mass approaching 70 kDa, while no  
262 corresponding protein is observed in the stained protein gel (**Figure 2A**). We speculate this  
263 represents low amounts of either glycosylated unprocessed AtPME2 protein as observed in  
264 the hypocotyl and root blots (**Figure 2C**), or possibly dimers formed during electrophoresis.

265 To examine the role of the PRO-peptide for expressing active AtPME2 isoform in  
266 *Pichia*, we produced truncated forms by gradually deleting amino acids downstream from the  
267 putative signal peptide of the protein sequence (from 4 amino acids –“ $\Delta$ 4FL”- up to 212  
268 amino acids –“ $\Delta$ 212FL”-, **Supplemental Figure 2A, 2B and 5**). Using the gel diffusion assay  
269 to follow PME activity, we showed that the first 20 amino-acids downstream the putative  
270 signal peptide are dispensable for the proper expression of active AtPME2 (**Supplemental**  
271 **Figure 5**). These results support the hypothesis that the PRO-domain directs folding of the  
272 full-length protein allowing interaction by a subtilisin-like *Pichia* protease with the processing  
273 sequence motifs in AtPME2, to provide subsequent secretion of an active isoform into the  
274 culture medium.

275

## 276 **Biochemical characterization of AtPME2**

277 The pH-dependency and sensitivity to inhibition by PME1 were determined for the  
278 purified AtPME2. Using the ruthenium red gel diffusion assay with a high DM pectins (>  
279 85%) as a substrate, we showed the enzyme was the most active at neutral pH (7.5), although  
280 it was still active at pH 5 (**Figure 3A**). AtPME2 activity was inhibited at the three pHs tested  
281 (5, 6.3 and 7.5) by the previously reported pH-insensitive AtPMEI9 inhibitor protein (Hocq,  
282 S  n  chal, *et al.*, 2017). This inhibition was positively correlated with increasing quantities of  
283 AtPMEI9 (**Figure 3A**). In addition, AtPME2 could also be inhibited by pH-sensitive  
284 AtPMEI4 at pH 5 (**data not shown**).

285 We assessed AtPME2 activity on citrus pectins with varying esterification at the  
286 optimal pH 7.5. When using pectic substrates of low DA, AtPME2 activity was the strongest  
287 for DM 55 to 70% (40 nmol MeOH.min<sup>-1</sup>.  $\mu$ g proteins<sup>-1</sup>), and activity was reduced by ~half  
288 when using substrates of high (>85%) or low (24-30%) DM. AtPME2 was active on sugar  
289 beet pectins of DM 42% and DA 34%, suggesting acetylation of GalA residues may  
290 minimally affect the enzyme’s activity (**Figure 3B**). Using the best substrate (pectins DM

291 55% - 70%) and the optimal pH of 7.5, we determined the kinetic parameters of the enzyme  
292 and showed that the  $K_m$  was 0.481 mM and the  $V_{max}$  was 0.019 nmol MeOH.min<sup>-1</sup>.μg  
293 protein<sup>-1</sup> (**Figure 3C**).

294

### 295 **AtPME2 has a low degree of processivity in acidic conditions**

296 In order to get precise insights into AtPME2 activity, we designed an experimental set-  
297 up to characterize its degree of processivity. We first digested the DM 55 to 70% with a  
298 fungal polygalacturonase (endo-PG from *Aspergillus aculeatus*) for 3 h to generate a  
299 population of HG oligogalacturonides (OGs) of various DP and DM. Following heat  
300 denaturation of PG activity, the processivity of AtPME2 was determined by characterizing the  
301 relative proportion of the resulting OGs, classified by DP and DM, after overnight incubation  
302 with 20 nmol AtPME2 at pH 8 and 80 nmol AtPME2 at pH 5 (to compensate for the lower  
303 PME activity at acidic pH). As a control, we used the commercially available PMEs extracted  
304 from Citrus peels, and which also present stronger activity at neutral pH compared to acidic  
305 pH (**data not shown**). The population of OG identified after PME digestion was then  
306 compared to that obtained in non PME-treated condition (named hereafter control pH 8 and  
307 control pH 5). In control samples, we were able to detect different methylated forms for each  
308 DP, with a peak of relative abundance corresponding on average to slightly more than 50%  
309 DM (*e.g.* GalA7Me4, GalA8Me4, GalA10Me6), in accordance with the mean DM of the  
310 pectins used as a substrate. At optimal pH 8, when considering oligos of DP comprised  
311 between 3 and 10, for instance DP 10 (GalA10), the different methylated forms detected in  
312 the control samples (GalA10Me5, GalA10Me6, GalA10Me7) were totally absent in AtPME2-  
313 treated OGs (**Figure 4A**). Similar results were obtained when using Citrus PME  
314 (**Supplemental Figure 6B**).

315 When PME treatment (AtPME2 and CsPME) was performed at pH 5, results were  
316 strikingly different. For a given DP, the proportion of highly methylesterified forms (> 50%  
317 DM) decreased in the PME-treated samples compared to control pH 5 (**Figure 4B**,  
318 **Supplemental Figure 6B**). OGs with lower DM appeared when treatment with PME was  
319 performed (GalA10Me, GalA10Me2 and GalA10Me3, absent in control pH 5), and relative  
320 amount of higher DM decreased (GalA10Me5, GalA10Me6 and GalA10Me7) (**Figure 4B**  
321 **inset**, **Supplemental Figure 6B inset**). Results were similar for OGs of distinct DPs,  
322 including GalA6, GalA7, GalA8 and GalA9, with a shift in the abundance from highly  
323 methylesterified to low methylesterified forms of these OGs in PME-treated samples as  
324 compared to control pH5. It has to be mentioned that those differences in the DM

325 distributions are more pronounced when using AtPME2 compared to CsPME. For OGs of DP  
326 < 5, no differences were detected between samples, suggesting that PME2 and CsPME have a  
327 strong preference for substrates of DP > 5 at pH 5. Taken together, these results show that the  
328 degree of processivity of the two PMEs increases as the pH shifts from acidic towards neutral  
329 to alkaline pH.

330

### 331 **The electrostatic potential of PMEs correlates with their processivity**

332 Electrostatic properties have been identified as significant in order to rationalize the  
333 basis of PMEs processivity, with charge asymmetry along the binding groove being an  
334 important feature to promote the sliding of negatively charged, demethylesterified,  
335 polysaccharides (Mercadante *et al.*, 2014). We chose to compare the electrostatic potentials of  
336 the 2 PMEs whose modes of action were determined in this study, in addition to a fungal  
337 acidic PME from *Aspergillus niger*, AnPME, whose random mode of action at both pH has  
338 already been published (Duvetter *et al.*, 2006; Kent *et al.*, 2016; Cameron *et al.*, 2008).  
339 Interestingly, AtPME2 and CsPME4 (the major isoform present in the commercial PME from  
340 orange peel), which experimentally increase in processivity with increasing pH, show the  
341 largest differences in the electrostatic similarity indices, whereas AnPME, which has been  
342 indicated as a non-processive, acidic PME (Kent *et al.*, 2016) shows little differences across  
343 pH (**Figure 5A**). Moreover, the projection of the electrostatic potential differences between  
344 acidic and alkaline pH on the protein surfaces, normalized to highlight the differences  
345 between AtPME2 and CsPME4 or AnPME, show a concentrated positive charge patterning in  
346 the binding groove, with the largest difference observed for CsPME4 and small to no  
347 difference (electrostatic potential difference close to 0) for AnPME; as expected from  
348 comparing the action of these PMEs experimentally (**Figure 5B**).

349

### 350 **Loss of function in AtPME2 mutants can alter pectin remodeling enzyme activities**

351 To investigate AtPME2's role in controlling growth and development, two  
352 homozygous T-DNA insertional knockout (KO) lines, *pme2-1* (GK-835A09, in the third  
353 exon) and *pme2-2* (FLAG\_445B05, in the first exon), were identified in Arabidopsis Col-0  
354 and WS backgrounds respectively. RT-PCR analyses revealed that both mutant lines were KO  
355 at the transcript level (**Figure 6A**). Consistent with this, no tryptic peptides from the catalytic  
356 domain of AtPME2 were detected by proteomic analyses performed on cell wall-enriched  
357 protein fractions from *pme2-1* and *pme2-2* hypocotyls (**Supplemental Table IA**). This  
358 ultimately shows that *pme2* allelic mutants are KO at the protein level. This was further

359 supported by zymogram analysis where cell wall-enriched protein extracts from wild-type,  
360 *pme2-1* and *pme2-2* hypocotyls were resolved by isoelectric focusing (IEF) coupled with  
361 detection of PME activity. Results obtained showed no activity band at a pI of ~9 in the KO  
362 lines, which corresponds to the predicted pI of the mature part of AtPME2 (**Figure 6B**). No  
363 changes in the activity of the other PME isoforms were apparent, suggesting that the absence  
364 of the AtPME2 protein is likely to impact total PME activity. This was further confirmed by  
365 measuring pectin remodeling enzymes activities of cell wall-enriched proteins of 4 day-old  
366 dark-grown hypocotyls. As anticipated, we observed that the total PME activity decreased in  
367 *pme2* mutants compared to wild-type (**Figure 6C**). Total PG activity measured in the same  
368 type of extracts was also reduced by 10 % and 20 % in *pme2-1* and *pme2-2*, respectively  
369 (**Figure 6D**). In roots, total PME and PG activities were as well decreased in *pme2* mutants,  
370 albeit to a lesser extent compared to what was observed in dark-grown hypocotyls  
371 (**Supplemental Figure 7A and 7B**).

372

### 373 **AtPME2 plays a role in controlling hypocotyl elongation through regulation of** 374 **mechanical properties**

375 To determine if changes in pectin remodeling enzyme activities may affect  
376 seedling development, we first assessed the effects of the mutations on primary root length  
377 and lateral root emergence. In our experimental conditions, elongation of primary root was  
378 slightly impaired in both mutants, although only significantly in Col-0 background, in relation  
379 to the decrease in the length of fully elongated cells (**Supplemental Figure 7C, data not**  
380 **shown**). Considering AtPME2 expression pattern, lateral root density was also assessed and  
381 results showed significant lower density only for Col-0 allele (**Supplemental Figure 7D**).

382 We next followed etiolated hypocotyl elongation over a time-course. The rationale for  
383 etiolated hypocotyls includes: i) In the hypocotyl, cell length increased in an acropetal wave  
384 starting approximately 48 hours after sowing, ii) AtPME2 is highly expressed in the upper  
385 part of a 4 day-old growing hypocotyl, below the hook, where cells are strongly elongating, so  
386 that the absence of AtPME2 in mutants should alter their development. Thus, we  
387 hypothesized KO mutants lacking AtPME2 activity will show altered hypocotyl development.  
388 Kinematic analysis showed hypocotyl length was significantly different in both alleles, with a  
389 reduction of 10% as compared to wild-type (**Figure 7A**). The differences between wild-type  
390 and *pme2* mutants were more important from 72 h onwards, which corresponds to the rapid  
391 elongation phase. To assess if the decrease in the length is related to changes in the  
392 mechanical properties of the cell wall, we measured the stiffness (as apparent Young's

393 modulus) of the cell wall using atomic force microscopy (AFM) in the *pme2-1* mutant and its  
394 corresponding wild-type Col-0. The stiffness of the epidermal cell wall at the basal part of 4-  
395 day-old hypocotyls, was similar between *pme2* and WT Col-0 (**Figure 7B, bottom panel**). In  
396 contrast, the apical part of hypocotyls (the zone where the promoter of *AtPME2* was shown to  
397 be active) showed a 10% increase in cell wall stiffness in the *pme2-1* mutant, compared to  
398 wild type (**Figure 7B, top panel**). As such, a more rigid cell wall in the *pme2-1* mutant could  
399 restrict hypocotyl elongation. The Young's modulus measured at the top of dark-grown  
400 hypocotyl was lower (~20 MPa) than that measured in the basal part (60 MPa), also reflecting  
401 the difference of cell wall stiffness in relation to growth rate.

402

403



## 404 Discussion

405 How the mode of action by individual pectin methylesterases affect pectin's chemistry  
406 and the mechanical properties of plant cell walls remains unresolved. This is in part due to the  
407 difficulty for obtaining purified single isoforms from plant material and to co-expression of  
408 multiple isoforms from this very large gene family. Here, we report on AtPME2, a PME  
409 shown to be differentially expressed during lateral root emergence and dark-grown hypocotyl  
410 elongation. Starting from its production in heterologous system and full biochemical  
411 characterization, we describe how its mode of action varies as a function of ambient pH and  
412 assess the way this might control plant development.

413 While *AtPME2* gene was previously shown, among other *PMEs* and *PMEIs*  
414 (At3g49220, At3g14310, At4g25250...) to be highly expressed during the growth transition  
415 phase in dark-grown hypocotyls (Pelletier *et al.*, 2010) we show that the *AtPME2* promoter is  
416 highly active at the top of hypocotyls in 3 to 4 day-old dark grown seedlings (**Figure 1**). At 4  
417 days, mainly the cells below the hook undergo elongation (Refrégier *et al.*, 2004; Daher *et al.*,  
418 2018; Peaucelle *et al.*, 2015). The *AtPME2* promoter is also highly active in the root  
419 elongation zone, probably in relation with cell elongation, and during lateral root formation,  
420 as suggested by previous data sets (Brady *et al.*, 2007; Hruz *et al.*, 2008) and recently  
421 confirmed using RNA sequencing and immunocytochemistry (Wachsman *et al.*, 2020). In  
422 lateral root primordia, the promoter's activity initiates at stage VI before emergence (Malamy  
423 and Benfey, 1997), suggesting a role with other pectin remodeling enzymes (including PG) in  
424 the process of lateral rhizogenesis (Swarup *et al.*, 2008; Kumpf *et al.*, 2013; Hocq *et al.*,  
425 2020). Our results are in accordance with this hypothesis (**Supplemental Figure 7**), which  
426 was recently confirmed by a study showing *AtPME2* to be of prime importance for  
427 determining lateral root emergence through the control by the root clock (Wachsman *et al.*,  
428 2020). The authors showed that the *pme2* mutant had indeed reduced lateral root density  
429 compared to wild-type.

430 Peptide mass fingerprinting analyses identified *AtPME2* and other PME isoforms  
431 present in the cell wall-associated proteome from dark-grown hypocotyls and radicles in  
432 seedling (**Supplemental table IA, B**). Their presence as mature, processed proteins supports  
433 SBT-mediated processing occurs in the cell before their deposition at the apoplast. Using C-  
434 terminal translational fusion, we showed *AtPME2* present both at the cell wall and in the  
435 cytoplasm, further suggesting that its maturation occurs during transport (**Figure 1A**). The  
436 differential detection of peptides mapping only the mature PMEs (i.e., the catalytic domain)  
437 shown for other plant PME (in similar or distinct organs) indicates a ubiquitous processing



438 mechanism (San Clemente and Jamet, 2015; Sénéchal *et al.*, 2015; Hervé *et al.*, 2016;  
439 Nguyen-Kim *et al.*, 2016).

440 Obtaining sufficient amounts of plant PME for biochemical analysis, through their  
441 expression in a non-host system, has often turned out to be challenging, despite early reports  
442 showing that AtPME31 and AtPME12 can be expressed in *E. Coli* (Dedeurwaerder *et al.*,  
443 2009; Cheong *et al.*, 2019), or that an acidic PME from Jelly fig can be produced in yeast  
444 (Peng *et al.*, 2005). While our initial attempt to produce AtPME2 (group 2 plant PME)  
445 directly as a mature form in *Pichia* proved unfeasible, we subsequently showed the PRO  
446 domain was required for proper cleavage and release of a functional PME. Thus, catalytically  
447 active AtPME2 was achieved by expressing the full-length protein minus the plant signal  
448 peptide (**Figure 3; Supplemental Figure 5**). We further determined using successive N-  
449 terminus deletions of the protein sequence, that the expression of an active AtPME2 in *Pichia*  
450 *pastoris* requires a large part (~200 amino acids) of the N-terminal extension (**Supplemental**  
451 **Figure 2 and 5**). Our results support the hypothesis that the PRO part supports recognition  
452 processing motifs RCLK and RLL in AtPME2 by endogenous yeast subtilisins, including  
453 KEX2 and SUB2 (Bader *et al.*, 2008; Salamin *et al.*, 2010). *In planta*, PME and SBTs are co-  
454 expressed during development and the S1P-mediated processing of group 2 PMEs is required  
455 for the export of active enzymes in the cell wall (Wolf *et al.*, 2009). It was further suggested  
456 that the PRO-region inhibits group 2 PMEs activity during transport through the secretory  
457 pathway (Bosch, 2005; Bosch and Hepler, 2005; Dorokhov *et al.*, 2006). We now have the  
458 tools to decipher the sequence and structural determinants of AtPME2 processing: Using  
459 *Pichia*, site-directed mutagenesis of the processing motifs, as well as the generic anti-PME  
460 antibody characterized within the course of this study, we could assess the *in vitro* interaction  
461 between AtPME2 (or any PME) with purified SBT. In addition, through co-  
462 immunoprecipitation analyses, the anti-PME antibody will be a unique tool to help identifying  
463 PME-SBT, as well as PME-PMEI complexes present in the apoplast *in vivo*.

464 Recombinant expression of functional AtPME2 enabled its biochemical  
465 characterization, showing a weakly alkaline pH activity optimum (**Figure 3A**), like  
466 Arabidopsis AtPME3 and AtPME31 (Dedeurwaerder *et al.*, 2009; Sénéchal *et al.*, 2015). The  
467 predicted pI~9 for AtPME2 might explain the pH-dependency of the enzyme's activity as it  
468 was previously shown that most plant and bacterial PMEs have a neutral to alkaline pI, while  
469 fungal enzymes are acidic (Sénéchal, Wattier, *et al.*, 2014). AtPME2 is inhibited *in vitro* by  
470 both pH-sensitive and pH-insensitive PMEIs (AtPMEI4 (data not shown) and AtPMEI9  
471 (**Figure 3A**), respectively) (Hocq, Sénéchal, *et al.*, 2017). This suggests that it might be the

472 target of multiple inhibitors at the cell wall, which further questions the role of such diversity  
473 of PME-PMEI interactions.

474 We applied a newly developed LC-MS/MS oligosaccharide-profiling approach, that  
475 determines DP and methylation of OGs, for analysing PME processivity (Hocq *et al.*, 2020;  
476 Voxeur *et al.*, 2019). We determined that AtPME2 presents a non-processive mode of action  
477 at pH 5, which is approximate to the apoplastic cell wall pH, while at its activity optimum pH  
478 8, it showed a processive mode of action (Hocq *et al.*, 2017). This was demonstrated in  
479 **Figure 4A** where with PME treatment at alkaline pH the unmethylated OG trimer and  
480 tetramer were the predominant end-products accumulated. These OGs can result from the  
481 residual activity of *Aspergillus* PG in the reaction mixture: in absence of calcium *in vitro*,  
482 long blocks of unmethylated HG created by processive demethylesterification of pectins at  
483 pH8 are preferential substrates, leading to hydrolysis of the OGs pool. In contrast, AtPME2  
484 random demethylesterification occurring at pH 5 resulted in intermediate DP OGs, of  
485 decreased mean DM, which show less affinity for *Aspergillus* PG (**Figure 4B**).

486 Processive behaviour by plant and bacterial PMEs have been described in detail  
487 (Willats *et al.*, 2006; Jolie *et al.*, 2010), and the structural determinants of the processivity of  
488 the *Erwinia* PME was unraveled using molecular dynamic (MD) simulations (Mercadante *et*  
489 *al.*, 2014; Mercadante *et al.*, 2013), where the rotation of monosaccharide subunits in the  
490 binding groove of the enzyme was shown to be a key determinant of the processivity. In  
491 contrast to plant and bacterial PMEs, fungal enzymes are often regarded as being non  
492 processive. The recent elucidation of the 3D structure of a non-processive, salt-requiring,  
493 PME from *Aspergillus niger* demonstrated key differences between processive and non-  
494 processive isoforms, highlighting the importance of the electrostatic potentials of the enzymes  
495 in determining their processivity (Kent *et al.*, 2016). This is in accordance with our  
496 experimental observations of the differences in processivity observed at different pH for the  
497 plant PMEs. Differences in the electrostatic similarity indices (Blomberg *et al.*, 1999; Wade *et*  
498 *al.*, 2001) calculated at two different pH can therefore yield an understanding of the different  
499 properties of PMEs at different pH. The comparison of the electrostatic potentials of PMEs  
500 either active in basic or acidic conditions, interestingly suggests that differences between the  
501 electrostatic potentials at acidic and alkaline pH are particularly concentrated in proximity of  
502 subsites -2 and -3, which have been identified as preferentially docking negatively charged  
503 de-methylesterified galacturonic acid monomers; with non-processive AnPME showing the  
504 absence of positive patches in these subsites. Our results clearly demonstrate that the pH-  
505 dependency of the mode of action of PMEs, previously suggested in early reports on apple

506 PME (Catoire *et al.*, 1998), might be a key to fine-tune enzymes activity in cell wall  
507 microenvironments defined by local pH. Localized changes in apoplastic pH were indeed  
508 previously shown to be of major importance for auxin-mediated hypocotyl elongation  
509 (Fendrych *et al.*, 2016). As such, pH-dependent changes in PME mode of action might  
510 explain a number of unexpected results linking pectin chemistry to cell wall mechanical  
511 properties gathered over the last 10 years. Based on *in vitro* studies on pectin-based gels, it  
512 was assumed that demethylesterification of pectins by plant PME should lead to large  
513 stretches of negatively-charged GalA that can cross-link with calcium ions, stiffening the wall  
514 (Willats *et al.*, 2001). However, this scheme appears contradictory with reports showing that  
515 overexpressing plant PMEs lead to reduced stiffness of the wall, through decreased values of  
516 the Young's modulus (Peaucelle, Braybrook, *et al.*, 2011; Peaucelle *et al.*, 2015; Wang *et al.*,  
517 2020). Supported by our results on AtPME2, a possible explanation of these apparent  
518 contradictory reports might reside in the fact that, within the acidic context of the cell wall,  
519 PME mode of action is not what was inferred from *in vitro* studies and may change according  
520 to pH microenvironments.

521 To assess whether the absence of AtPME2 can have consequences on development,  
522 we analyzed two T-DNA alleles, *pme2-1* and *pme2-2*, knock-out at the gene and protein  
523 levels. We showed that *pme2* mutants had reduced root length as well as reduced lateral roots  
524 density, compared to the control. Our data further demonstrated that dark-grown hypocotyls  
525 of *pme2* mutants were shorter compared to wild-type, which correlated with an increase in  
526 cell wall's Young's Modulus in elongating cells of this organ, at the top of the hypocotyl. In  
527 addition, these mutants showed decreased PME as well as reduced PG activities. It therefore  
528 appears that, in *pme2* mutants, higher methylesterification of pectins would prevent their  
529 hydrolysis by PGs, reducing elongation through stiffening the walls. Our results are in  
530 accordance with those presented by Peaucelle *et al.* (Peaucelle *et al.*, 2011; Peaucelle *et al.*,  
531 2015), either in elongating organs such as our model, or in meristems, where softening of the  
532 wall is a prerequisite for organ initiation. In both cases, softening of the wall was correlated  
533 with higher 2F4 labelling (Peaucelle *et al.*, 2015; Braybrook and Peaucelle, 2013). According  
534 to our results, in the acidic context of the cell wall, AtPME2 would participate to pectin  
535 demethylesterification by randomly acting on the HG chains, leading to the creation of  
536 substrates for PG, and consequent destructuration of HG. The somehow contrasting reports  
537 linking pectins to cell wall mechanics (Daher *et al.*, 2018; Peaucelle *et al.*, 2015) might be  
538 partially explained by our results, suggesting that pH plays a key role in changing PME  
539 processivity, thereby affecting pectin mechanical properties. Our biochemical data support a

540 model for which the regulation of PME activity by microdomains of distinct pH might be a  
541 key to link pectin chemistry to cell wall mechanics.

542

## 543 **Material and Methods**

### 544 **Plant material and growth conditions**

545 Two *Arabidopsis thaliana* T-DNA insertion lines in the Columbia-0 (Col-0) and WS  
546 (Wassilewskija) ecotypes were used for *At1g53830* (*PME2*): *pme2-1* (GK-835A09, in the  
547 third exon) and *pme2-2* (FLAG445B05, in the first exon). Homozygous lines were isolated  
548 using gene-specific primers, *pme2-1* (F 5'- GACGGAAGCGGTGACTTTAC-3' and R 5'-  
549 AGTGTCCAACGCAAAACTCC-3'); *pme2-2* (F 5'-CTCAACACTATACCCGGA-3' and R  
550 5'-ACTTTCCTATCGGCGTCG-3') as well as T-DNA specific primers for GK (F 5'-  
551 ATATTGACCATCATACTCATTGC-3') and FLAG (F 5'-  
552 CTACAAATTGCCTTTTCTTATCGAC-3'). For RT-qPCR analysis of *AtPME2* gene  
553 expression, seeds from Columbia-0 (Col-0) background were sowed either on soil or on plates  
554 containing ½ MS solid media and placed two days in cold chamber for stratification. Seeds in  
555 soil were then transferred in greenhouse, and plates in growth chambers, in the following  
556 conditions: 16h photoperiod at 120  $\mu\text{mol m}^{-2} \text{s}^{-1}$  and at 23°C). For dark-grown hypocotyls,  
557 seeds were sterilized and sown *in vitro* as previously described (Hocq *et al.*, 2020). Plates  
558 were incubated at 4°C for 2 days for stratification and transferred to the light  
559 (120  $\mu\text{moles/m}^2/\text{s}$ ) for 6 hours to induce germination. Plates were placed in the dark, wrapped  
560 with three layers of aluminum foil and incubated in the same conditions of temperature.  
561 Organs were collected, frozen in liquid nitrogen and stored at -80°C before use. For kinetic  
562 phenotyping of hypocotyls, seeds from the four genotypes were sterilized and sown *in vitro* as  
563 above mentioned previously described (Hocq *et al.*, 2020). They were then put in the dark at  
564 21°C for 6 days in a phenobox chamber. This specific growth chamber is designed to receive  
565 27 square Petri dishes (12mm\*12mm) and to allow automatic image acquisition of each one  
566 using a 36 Mpix D810 camera (Nikon, Champigny sur Marne, France) fixed onto a robotic  
567 arm (Optimalog, Saint-Cyr-sur-Loire, France). Pictures were taken every 4 hours, during the  
568 first 20 hours, and then every 2 hours. Images from each seedling were analyzed by a specific  
569 software (Optimalog) for measurement of hypocotyl length. For each biological replicate, at  
570 least 40 hypocotyls were analyzed.

571

### 572 **Analysis of gene expression by RT-qPCR**

573

574 Total RNAs extraction, cDNA synthesis and RT-qPCR experiments were performed  
575 as previously described (Hocq *et al.*, 2020) using specific primers for *AtPME2* (F 5'-  
576 TACGACGACGCCGATAGGAAAG-3' and R 5'-ATGTGCTCCACGTGTACCTGAC-3').  
577 Relative expression was normalized according to the most stable reference genes, identified  
578 with Genorm in each sample panels (Vandesompele *et al.*, 2002): *CLA* when the expression of  
579 *AtPME2* was measured in the different organs (*At5g46630*, *CLA*-F 5'-  
580 GTTTGGGAGAAGAGCGGTTA-3' and *CLA*-R 5'-CTGATGTCACTGAACCTGAACTG-  
581 3') and *TIP41* during the time course of dark-grown hypocotyl development (*At4G34270*,  
582 *TIP41*-F 5'-GCTCATCGGTACGCTCTTTT-3' and *TIP41*R 5'-  
583 TCCATCAGTCAGAGGCTTCC-3'). Method used to determine relative expression was  
584 previously described in Sénéchal *et al.* (Sénéchal *et al.*, 2014). Two to three biological  
585 replicates were realized, with two technical replicates each.

586

### 587 **Promoter amplification, plant transformation and GUS staining**

588 Amplification of the promoter sequence of *AtPME2* (~2 kb upstream of the *AtPME2*  
589 transcription start) was performed using the specific primers F 5'-  
590 AAGCTTGTACAATGATGGTTCTATTGT-3' and R 5'-  
591 TCTAGAGGTGGAATAGGGTTTATATTG-3', with AAGCTT and TCTAGA being  
592 recognition sites for *Hind*III and *Xba*I enzymes respectively. The purified PCR product was  
593 subsequently cloned into pBI101.3 (Ozyme, Saint-Cyr l'Ecole, France), upstream of GUS  
594 coding gene. Transformation, plant selection, GUS staining and image acquisition was as  
595 previously described (Hocq *et al.*, 2020).

596

### 597 **Fusion of *AtPME2* coding sequence with fluorescent tag and confocal imaging**

598 *At1g53830* coding sequence was amplified from Riken pda01692 by PCR using  
599 Phusion Hot Start II DNA Polymerase (Thermo Scientific, F549) with two specific primers: F  
600 5'- CACCATGGCACCAATCAAAG -3' and R-5'-AAGACTTAACGAGAAAGGAA-3'.  
601 Coding sequence was inserted in a first vector, pENTR™ Directional TOPO® (Invitrogen),  
602 then transferred in binary vector pGBW454 *via* LR reaction (Gateway LR Reaction Kit,  
603 Invitrogen) resulting in the translational fusion of *AtPME2* with GFP (green fluorescent  
604 protein) sequences under the control of CaMV-P35S promotor. *Rhizobium radiobacter*  
605 (C58C1) was transformed with pGBW405 recombinant vector *via* electroporation and used  
606 for transformation of Arabidopsis. After selection of transformants, roots were incubated with  
607 propodium iodine (IP, 0.1 mg ml<sup>-1</sup>, Sigma-Aldrich, # P4864, St. Louis, MO, USA) for 20



608 minutes, then transferred in 1 M sorbitol solution to plasmolyze cells before observation  
609 under confocal microscope (Zeiss, LMS 780). Excitation wavelengths are 370-560 nm and  
610 488 nm for IP and GFP respectively, and emission wavelengths are 631 nm and 493-549 nm  
611 in the same order.

612

### 613 **AtPME2 cloning and overexpression in *Pichia pastoris* and purification**

614 The coding sequence, minus the signal peptide, of *At1g53830* was amplified from  
615 Riken pda01692, using the Phusion Hot Start II DNA Polymerase and specific primers (F 5'-  
616 **CTGCAGGAGCCACAACAACAAC** -3' and R 5'-  
617 **GCGGCCGCAAGACTTAACGAGAAAGGA** -3'). The amplified full-length sequence,  
618 referred as "FL", was cloned in frame with polyHis sequence into pPICZ $\alpha$ B (ThermoFisher  
619 Invitrogen™) after restriction by *PstI-NotI*, as previously described (Hocq *et al.* 2020). For  
620 truncation of the N-terminus PRO part of AtPME2, sequences were amplified using the  
621 primers described in **Supplemental Figure 2** and cloned in the same conditions. These  
622 sequences were referred as  $\Delta$ 4FL,  $\Delta$ 8FL,  $\Delta$ 16FL,  $\Delta$ 20FL,  $\Delta$ 40FL,  $\Delta$ 115FL,  $\Delta$ 192FL and  
623  $\Delta$ 212FL. After *E. coli* TOP10 (Invitrogen) transformation, recombinant plasmid was verified  
624 by sequencing, and the linearized construct was inserted into X-33 *Pichia pastoris* for protein  
625 expression. Selection of transformants and cultures were performed as previously described  
626 (Hocq *et al.*, 2020). Culture supernatants were recovered following centrifugation, then  
627 applied onto a CM-FF Hi trap cation-exchange column following the manufacturer's  
628 instructions (GE-Healthcare). Fractions with PME activity were pooled and concentrated  
629 using 10kDa Amicon filtration column before desalting using a PD spin trap G-25 column  
630 (GE-Healthcare). For LC-MS determination of the mode of action, aliquots of AtPME2 were  
631 exchanged into 100 mM ammonium acetate pH 5, or 20 mM Tris HCl pH 8 using Amicon®  
632 Ultra 0.5 mL Centrifugal Filters (Millipore) following manufacturer's recommendations.

633

### 634 **Mass spectrometry analysis of PMEs**

635 Cell wall-enriched protein fractions from 4 day-old dark-grown hypocotyls (WT and  
636 *pme2* mutants) and roots (WT) were extracted from 50 mg frozen fine powder according to  
637 method previously described (Sénéchal, Graff, *et al.*, 2014). Equal amounts of proteins were  
638 resolved on SDS-PAGE for each condition. Tryptic peptides from excised bands were  
639 separated and analysed as previously described (Sénéchal, Graff, *et al.*, 2014). Following  
640 purification of AtPME2 by cation exchange chromatography, bands corresponding to putative  
641 mature and PRO part were excised and treated as described above.

642

### 643 **PME-specific antibodies and Western blot analysis**

644 For Western blot analysis of recombinant AtPME2, AtPME3 (Sénéchal *et al.*, 2015),  
645 purified native sweet orange and tomato PMEs (Savary *et al.*, 2010; Savary *et al.*, 2013;  
646 Savary, 2001), and cell wall-enriched protein extracts from dark-grown hypocotyls and roots,  
647 were separated onto a SDS-PAGE and supernatant proteins was transferred from resolving gel  
648 to Hybond-P PVDF transfer membrane (GE Healthcare, Amersham™ RPN303F) using the  
649 manufacturer's instructions and a Trans-Blot TURBO Transfer System (Bio-Rad, 170-4155)  
650 at 0.1A for 30 min. Blotted membranes were blocked with BSA and incubated for 2 h at room  
651 temperature with 1:3000 dilution of anti-PME primary antibody. This polyclonal antibody  
652 was raised in rabbits against a synthetic peptide (CKTYLGRPWKEYSRT) (Genscript,  
653 Piscataway, NJ) that includes the highly conserved amino acid sequence including residue in  
654 the catalytic site of PMEs (Marković and Janeček, 2004) and was shown to cross-react with  
655 plant PMEs, including *Citrus sinensis* and tomato fruit PMEs, representing multiple gene  
656 isoforms. Blotted membrane was probed with 1:5000 dilution of anti-rabbit secondary  
657 antibody coupled with peroxidase (ThermoFisher, 31460), followed by detection with the  
658 chemiluminescent substrate (ECL™ Prime Western Blotting System, GE Healthcare,  
659 RPN2232).

660

### 661 **Enzymatic activity assays**

662 Total PME activity was quantified on cell wall-enriched protein extracts using  
663 commercial citrus pectins (DM >85% P9561, Sigma-Aldrich) and the alcohol oxidase-  
664 coupled colorimetric assay (Klavons and Bennet, 1986; L'Enfant *et al.*, 2015). Substrate  
665 specificity of recombinant AtPME2 activity was determined at pH 7.5 and 28°C using  
666 commercial citrus pectin (Sigma-Aldrich, DM >85%, P9561; DM 55-70, P9436; DM 20-  
667 34%, P9311), sugar beet pectin (DM 42%, degree of acetylation 31% (CPKelco). Results  
668 were expressed as nmol MeOH min<sup>-1</sup> µg<sup>-1</sup> of protein using a methanol standard curve. The  
669 kinetic parameters, V<sub>max</sub> and K<sub>m</sub>, were determined on citrus pectin (DM 55-70%, Sigma-  
670 Aldrich, P9436). The reactions were performed with 3 to 6 replicates using substrate  
671 concentrations ranging from 0.125 to 2 mg mL<sup>-1</sup>. The kinetic data were calculated by the  
672 Hanes-Wolf plot. Total PG activity from cell wall enriched dark-grown hypocotyl extract was  
673 determined as previously described (Hocq *et al.*, 2020).

674

### 675 **Gel diffusion assays**



676 The effects of pH on purified AtPME2 activity and inhibition assays were quantified  
677 by gel diffusion (Downie *et al.*, 1998) with some modifications (Ren and Kermode, 2000).  
678 For each inhibition experiments, 5  $\mu\text{g}$  of purified protein were pre-incubated for 30 min at  
679 room temperature with AtPMEI9 in a final volume of 12  $\mu\text{L}$  as described previously (Hocq *et*  
680 *al.*, 2017). The PME activity in supernatants from various deletion mutants was assayed in the  
681 same conditions. The reaction mixtures were loaded into each well in the gels containing 0.1  
682 % citrus pectin (DM >85 %, Sigma-Aldrich, P9561) and prepared at pH 5, pH 6.3, and pH  
683 7.6. After incubation at 37 °C for 16 h, gels were stained with a 0.02 % (w/v) ruthenium red  
684 solution for 1 h and washed with distilled water. Diameters of the red halos, correspond to  
685 demethylesterified/acidic pectins, and reflect PME activity.

686

### 687 **Oligosaccharide mass oligoprofiling**

688 To determine the mode of action of recombinant AtPME2, first, 0.4% (w:v) citrus  
689 pectin DM 55-70 % (Sigma, Cat. No. P9436) were first subjected to a 2 h digestion in  
690 ammonium acetate buffer 100mM pH4 at 40 °C by 2.9 U.mL<sup>-1</sup> of *Aspergillus acuelatus endo-*  
691 *polygalacturonase M2* (Megazyme, Bray, Ireland) to generate OGs which differ in their  
692 degrees of polymerization and methylesterification. After addition of 1 volume absolute  
693 ethanol and centrifugation (5 min, 5000g), the upper phase containing OGs was divided in  
694 two tubes, evaporated using speed vac, and re-suspending either in ammonium acetate  
695 100mM pH 5, or in Tris HCl 20mM pH 8. After heat-inactivation of PG, OGs were treated for  
696 16h at 40°C by 80 nmol/min of purified AtPME2 either at pH 5 (Buffer) or 20 nmol/min at  
697 pH 8 (Buffer) in order to compensate for the difference in activity measured at both pH.  
698 Chromatographic separation of OGs by size exclusion chromatography (SEC), MS-detection  
699 and data acquisition and processing were performed as previously described (Hocq *et al.*,  
700 2020).

701

### 702 **Calculation and comparison of protein electrostatics**

703 For structural homology modeling of AtPME2 and CspME4 protein structure, we used I-  
704 TASSER prediction software (<https://zhanglab.ccmb.med.umich.edu/I-TASSER/>). 3D models  
705 of putative mature parts of Arabidopsis AtPME2 and Orange PME were created using *D.*  
706 *carota* PME (P83218, PDB:1GQ8, (Johansson *et al.*, 2002)) as a starting model. The  
707 calculation of the electrostatic potential was obtained by solving the linearized version of the  
708 Poisson-Boltzmann equation. Atomic radii and partial charges were assigned to each atom  
709 according to the AMBER99 force field parameters (Wang *et al.*, 2000), using the PDB2PQR

710 software version 2.1.1 (Dolinsky *et al.*, 2004). The structures of AtPME2, AnPME and  
711 CsPME4 were superimposed and electrostatic potentials were calculated using APBS version  
712 3 (Baker *et al.*, 2001), considering the protonation states empirically estimated using the  
713 PROPKA software, version 3.3 (Søndergaard *et al.*, 2011) at either pH 5.0 or pH 8.0. The  
714 solution of the Poisson-Boltzmann equation was discretized on a grid of dimensions  $19.3 \text{ nm}^3$   
715 and grid spacing of  $0.6 \text{ \AA}$ . The grid was centered on the  $C_\alpha$  atom of one of the PMEs catalytic  
716 aspartic acid residues, conserved across PMEs. In particular, Asp157, Asp189 and Asp153  
717 were chosen to center the grids of AtPME2, AnPME and CsPME4 respectively. Solvent  
718 dielectric was set at a value of 78.5 to account for an aqueous environment, whereas solute  
719 dielectric was set to 4.0 and temperature set at 298.15 K. Potentials calculated at alkaline pH  
720 were then subtracted, grid point by grid point, from the potentials calculated at acidic pH, to  
721 obtain an electrostatic potential difference. A numerical comparison of the electrostatic  
722 potentials was achieved by calculating electrostatic similarity indices (Blomberg *et al.*, 1999;  
723 Wade *et al.*, 2001). We calculated the cross-product between two electrostatic potentials  
724 calculated at each grid point as follows:

725

$$SI_{a,b}^H = \frac{2\phi_a(i,j,k)\phi_b(i,j,k)}{(\phi_a^2(i,j,k) + \phi_b^2(i,j,k))}$$

726 Where  $\phi_a^2(i,j,k)$  and  $\phi_b^2(i,j,k)$  are the electrostatic potentials calculated at the grid points  
727  $i,j,k$  for proteins  $a$  and  $b$  (Blomberg *et al.*, 1999; Wade *et al.*, 2001). In order to compare the  
728 differences in electrostatic potentials in acidic and basic environments, electrostatic similarity  
729 indices were calculated between the electrostatic potentials of the same PME obtained at pH  
730 5.0 and pH 8.0.

731

### 732 Atomic Force Microscopy (AFM) measurements

733 The protocol was adapted from (Milani *et al.*, 2011) and applied to wild type and *pme2-1*  
734 hypocotyls at 3 days after induction of germination. Hypocotyls were removed from the foiled  
735 boxes and then immobilized in 6 cm-diameter Petri dishes by gluing them with a  
736 biocompatible glue (Reprorubber-Thin Pour, Flexbar Ref. 16135) and covered with sterilized  
737 Milli-Q purified water to maintain hydration during all experiments. All mechanical  
738 measurements were performed as close as possible (typically  $\sim 1 \text{ mm}$ ) to the hook  
739 (**Supplemental Figure 8A**) or to the collet and the duration of measurements ranged 45-60  
740 min for each sample. We used a JPK Nanowizard III atomic force microscope, operated with

741 the JPK Nanowizard software 6.0.41. In order to characterize cell wall properties locally, we  
742 used two types of cantilever with pyramidal tip and spring constants 5N/m (TAP150/MPP-  
743 12100-10, Bruker) and 6N/m (RTESP-150, Bruker), aiming at probing the wall down to  
744 depths ~100nm. Cantilevers were calibrated following the standard thermal noise method.  
745 Deflection sensitivity was measured by indenting on sapphire in Milli-Q water. Spring  
746 constant was deduced from the first normal mode peak of its thermal noise spectrum, based  
747 on a single harmonic oscillator model. The same cantilever was used for several experiments  
748 in different days, as long as possible. Cantilevers were systematically cleaned, except when  
749 new. Before experiments, cantilevers were immersed 10 min in 2% Hellmanex III (Merck),  
750 10 min in Milli-Q water, and then 5 min in 70% ethanol. Following experiments, cantilevers  
751 were rinsed in Milli-Q water and then in 70% ethanol. We analysed three regions of size  
752 60 $\mu$ m $\times$ 60 $\mu$ m, spanning two or three cells from the top (farthest from the dish) of each  
753 hypocotyl. We first acquired a topographic image (**Supplemental Figure 8B**) using the  
754 Quantitative Imaging mode (QI), with a pixel size of 2 $\mu$ m x 2 $\mu$ m and a force set point of  
755 10nN; the sample rate of cantilever deflection was 5 kHz for approach and 25 kHz for retract.  
756 We determined manually about 60 points along the top of visible cells (**Supplemental Figure**  
757 **8B**) to avoid any biases due to slope of the sample surface. We then switched to force  
758 spectroscopy mode to obtain force-depth curves at these points. We used a trigger force of  
759 400 nN (Z closed loop on) chosen to reach a maximum indentation depth in the range 100 to  
760 400 nm, a ramp size (Z length) of 1.5  $\mu$ m, approach and retract velocities of 10  $\mu$ m/s, and a  
761 sample rate of 10 kHz. We analysed curves using JPK Data Processing software (versions  
762 6.1.79 to 6.1.157). Curves were flattened by removing a linear fit to the baseline (non-contact  
763 part). The contact point was first estimated using the first change in sign of force starting from  
764 the maximal force.

765 Indentation depth curve was calculated as height minus tip deflection. Apparent Young's  
766 modulus was obtained by fitting the 0-100  $\mu$ m depth range of the force-depth curve with the  
767 Sneddon model for a cone of half-angle 18°, assuming a Poisson ratio of 0.3 for the cell wall  
768 (**Supplemental Figure 8C**). All measurements for a given hypocotyl were pooled together  
769 and we computed the corresponding average modulus.

770  
771

## 772 **Statistical analysis**

773 Data represent the mean  $\pm$  SE and were treated with R software (R development Core Team,  
774 2008). Normality of data and equality of variances were assessed using Shapiro-Wilk and F-

775 tests, respectively. Non-parametric Wilcoxon test was carried out for pairwise comparisons.  
776 Significant differences between two groups were determined as highly significant for  $p <$   
777  $0.001$  (\*\*\*), significant for  $p < 0.1$  (\*\*), and moderately significant for  $p < 0.05$  (\*), while ns  
778 indicates non-significant differences.  
779

## 780 **Acknowledgements**

781 This work was supported by grants from the Agence Nationale de la Recherche (ANR-12-  
782 BSV5-0001 GALAPAGOS and ANR PECTOSIGN). LH was recipient of a studentship from  
783 the “Trans Channel Wallnet” project, which was selected by the INTERREG IVA program  
784 France (Channel) – England European cross-border cooperation program. The financial  
785 support from the Institut Universitaire de France (IUF) to JP is gratefully acknowledged.

786

## 787 **Author’s contribution**

788 L.H., O.H., A.V., F.F., CP-R, J.S., F.S., S.B., S.P., V.B., P.M., M-F.N., D.M. performed  
789 research and analyzed the results. D.M., B.J.S., T.B., A.B., VL and JP designed the research.  
790 V.L. and J.P. managed the project. V.L., J.P. wrote the manuscript with input from D.M.,  
791 B.J.S. and A.B.

792

## 793 **Conflicts of interest**

794 There are no conflicts of interest.

795

## 796 **Bibliography**

797 Andres-Robin, A., Reymond, M.C., Dupire, A., et al. (2018) Evidence for the regulation of  
798 gynoecium morphogenesis by ETTIN via cell wall dynamics. *Plant Physiol.*, 178, 1222–  
799 1232.

800 Bader, O., Krauke, Y. and Hube, B. (2008) Processing of predicted substrates of fungal Kex2  
801 proteinases from *Candida albicans*, *C. glabrata*, *Saccharomyces cerevisiae* and *Pichia*  
802 *pastoris*. *BMC Microbiol.*, 8, 116. Available at:  
803 <http://bmcmicrobiol.biomedcentral.com/articles/10.1186/1471-2180-8-116> [Accessed  
804 June 11, 2020].

805 Baker, N.A., Sept, D., Joseph, S., Holst, M.J. and McCammon, J.A. (2001) Electrostatics of  
806 nanosystems: Application to microtubules and the ribosome. *Proc. Natl. Acad. Sci. U. S.*  
807 *A.*, 98, 10037–10041. Available at: <https://pubmed.ncbi.nlm.nih.gov/11517324/>  
808 [Accessed November 24, 2020].

809 Blomberg, N., Gabdoulline, R.R., Nilges, M. and Wade, R.C. (1999) Classification of protein  
810 sequences by homology modeling and quantitative analysis of electrostatic similarity.

- 811 *Proteins Struct. Funct. Genet.*, 37, 379–387. Available at:  
812 [https://onlinelibrary.wiley.com/doi/full/10.1002/%28SICI%291097-](https://onlinelibrary.wiley.com/doi/full/10.1002/%28SICI%291097-0134%2819991115%2937%3A3%3C379%3A%3AAID-PROT6%3E3.0.CO%3B2-K)  
813 [0134%2819991115%2937%3A3%3C379%3A%3AAID-PROT6%3E3.0.CO%3B2-K](https://onlinelibrary.wiley.com/doi/full/10.1002/%28SICI%291097-0134%2819991115%2937%3A3%3C379%3A%3AAID-PROT6%3E3.0.CO%3B2-K)  
814 [Accessed November 17, 2020].
- 815 Bosch, M. (2005) Pectin Methylesterases and Pectin Dynamics in Pollen Tubes. *Plant Cell*  
816 *Online*, 17, 3219–3226. Available at:  
817 <http://www.plantcell.org/cgi/doi/10.1105/tpc.105.037473>.
- 818 Bosch, M. and Hepler, P.K. (2005) Pectin methylesterases and pectin dynamics in pollen  
819 tubes. *Plant Cell*, 17, 3219–3226.
- 820 Brady, S.M., Orlando, D.A., Lee, J.Y., Wang, J.Y., Koch, J., Dinneny, J.R., Mace, D., Ohler,  
821 U. and Benfey, P.N. (2007) A high-resolution root spatiotemporal map reveals dominant  
822 expression patterns. *Science (80-. )*, 318, 801–806.
- 823 Braybrook, S.A. and Peaucelle, A. (2013) Mechano-chemical aspects of organ formation in  
824 *Arabidopsis thaliana*: the relationship between auxin and pectin. *PLoS One*, 8, e57813–  
825 e57813. Available at: <https://pubmed.ncbi.nlm.nih.gov/23554870>.
- 826 Cameron, R.G., Luzio, G.A., Goodner, K. and Williams, M.A.K. (2008) Demethylation of a  
827 model homogalacturonan with a salt-independent pectin methylesterase from citrus: I.  
828 Effect of pH on demethylated block size, block number and enzyme mode of action.  
829 *Carbohydr. Polym.*, 71, 287–299. Available at:  
830 <http://www.sciencedirect.com/science/article/pii/S0144861707003530>.
- 831 Catoire, L., Pierron, M., Morvan, C., Hervé Du Penhoat, C. and Goldberg, R.E. (1998)  
832 *Investigation of the Action Patterns of Pectinmethylesterase Isoforms through Kinetic*  
833 *Analyses and NMR Spectroscopy IMPLICATIONS IN CELL WALL EXPANSION\**,  
834 Available at: <http://www.jbc.org/> [Accessed January 6, 2020].
- 835 Cheong, M.S., Lee, D.Y., Seo, K.H., Choi, G.H., Song, Y.H., Park, K.H. and Kim, J.H.  
836 (2019) Phenylephrine, a small molecule, inhibits pectin methylesterases. *Biochem.*  
837 *Biophys. Res. Commun.*, 508, 320–325.
- 838 Daher, F.B., Chen, Y., Bozorg, B., Clough, J., Jönsson, H. and Braybrook, S.A. (2018)  
839 Anisotropic growth is achieved through the additive mechanical effect of material  
840 anisotropy and elastic asymmetry. *Elife*, 7. Available at:  
841 <https://elifesciences.org/articles/38161> [Accessed February 4, 2019].
- 842 Dedeurwaerder, S., Menu-Bouaouiche, L., Mareck, A., Lerouge, P. and Guerineau, F. (2009)  
843 Activity of an atypical *Arabidopsis thaliana* pectin methylesterase. *Planta*, 229, 311–321.
- 844 Denès, J.M., Baron, A., Renard, C.M.G.C., Péan, C. and Drilleau, J.F. (2000) Different action

- 845 patterns for apple pectin methylesterase at pH 7.0 and 4.5. *Carbohydr. Res.*, 327, 385–  
846 93. Available at: <http://www.ncbi.nlm.nih.gov/pubmed/10990023> [Accessed January 6,  
847 2020].
- 848 Dixit, S., Upadhyay, S.K., Singh, H., Pandey, B., Chandrashekar, K. and Verma, P.C. (2013)  
849 Pectin methylesterase of *Datura* species, purification, and characterization from *Datura*  
850 *stramonium* and its application. *Plant Signal. Behav.*, 8.
- 851 Dolinsky, T.J., Nielsen, J.E., McCammon, J.A. and Baker, N.A. (2004) PDB2PQR: An  
852 automated pipeline for the setup of Poisson-Boltzmann electrostatics calculations.  
853 *Nucleic Acids Res.*, 32. Available at: <https://pubmed.ncbi.nlm.nih.gov/15215472/>  
854 [Accessed November 24, 2020].
- 855 Dorokhov, Y.L., Skurat, E. V., Frolova, O.Y., et al. (2006) Role of the leader sequence in  
856 tobacco pectin methylesterase secretion. *FEBS Lett.*, 580, 3329–3334. Available at:  
857 <http://doi.wiley.com/10.1016/j.febslet.2006.04.090> [Accessed June 11, 2020].
- 858 Downie, B., Dirk, L.M.A., Hadfield, K.A., Wilkins, T.A., Bennett, A.B. and Bradford, K.J.  
859 (1998) A gel diffusion assay for quantification of pectin methylesterase activity. *Anal.*  
860 *Biochem.*, 264, 149–157.
- 861 Duvetter, T., Fraeye, I., Sila, D.N., Verlent, I., Smout, C., Hendrickx, M. and Loey, A. Van  
862 (2006) Mode of De-esterification of Alkaline and Acidic Pectin Methyl Esterases at  
863 Different pH Conditions. *J. Agric. Food Chem.*, 54, 7825–7831. Available at:  
864 <https://doi.org/10.1021/jf060013h>.
- 865 Fendrych, M., Leung, J. and Friml, J. (2016) TIR1/AFB-Aux/IAA auxin perception mediates  
866 rapid cell wall acidification and growth of *Arabidopsis* hypocotyls. *Elife*, 5, e19048.  
867 Available at: <https://pubmed.ncbi.nlm.nih.gov/27627746>.
- 868 Francoz, E., Ranocha, P., Ru, A. Le, Martinez, Y., Fourquaux, I., Jauneau, A., Dunand, C. and  
869 Burlat, V. (2019) Pectin Demethylesterification Generates Platforms that Anchor  
870 Peroxidases to Remodel Plant Cell Wall Domains. *Dev. Cell*, 48, 261-276.e8.
- 871 Fries, M., Ihrig, J., Brocklehurst, K., Shevchik, V.E. and Pickersgill, R.W. (2007) Molecular  
872 basis of the activity of the phytopathogen pectin methylesterase. *EMBO J.*, 26, 3879–  
873 3887. Available at: <http://emboj.embopress.org/cgi/doi/10.1038/sj.emboj.7601816>  
874 [Accessed June 5, 2020].
- 875 Goldberg, R., Morvan, C., Jauneau, A. and Jarvis, M.C. (1996) Methyl-esterification, de-  
876 esterification and gelation of pectins in the primary cell wall. *Prog. Biotechnol.*, 14, 151–  
877 172.
- 878 Hervé, V., Duruflé, H., San Clemente, H., Albenne, C., Balliau, T., Zivy, M., Dunand, C. and



- 879 Jamet, E. (2016) An enlarged cell wall proteome of *Arabidopsis thaliana* rosettes.  
880 *Proteomics*, 16, 3183–3187. Available at: <http://doi.wiley.com/10.1002/pmic.201600290>  
881 [Accessed June 11, 2020].
- 882 Hewezi, T., Howe, P., Maier, T.R., Hussey, R.S., Mitchum, M.G., Davis, E.L. and Baum, T.J.  
883 (2008) Cellulose binding protein from the parasitic nematode *Heterodera schachtii*  
884 interacts with *Arabidopsis* pectin methylesterase: cooperative cell wall modification  
885 during parasitism. *Plant Cell*, 20, 3080–93. Available at:  
886 <http://www.ncbi.nlm.nih.gov/pubmed/19001564> [Accessed February 5, 2019].
- 887 Hocq, L., Guinand, S., Habrylo, O., et al. (2020) The exogenous application of AtPGLR, an  
888 endo-polygalacturonase, triggers pollen tube burst and repair. *Plant J.*, n/a. Available at:  
889 <https://doi.org/10.1111/tpj.14753>.
- 890 Hocq, L., Pelloux, J. and Lefebvre, V. (2017) Connecting Homogalacturonan-Type Pectin  
891 Remodeling to Acid Growth. *Trends Plant Sci.*, 22, 20–29. Available at:  
892 <http://dx.doi.org/10.1016/j.tplants.2016.10.009>.
- 893 Hocq, L., Sénéchal, F., Lefebvre, V., et al. (2017) Combined Experimental and  
894 Computational Approaches Reveal Distinct pH Dependence of Pectin Methylesterase  
895 Inhibitors. *Plant Physiol.*, 173, 1075–1093. Available at:  
896 <http://www.plantphysiol.org/lookup/doi/10.1104/pp.16.01790>.
- 897 Hruz, T., Laule, O., Szabo, G., Wessendorp, F., Bleuler, S., Oertle, L., Widmayer, P.,  
898 Gruissem, W. and Zimmermann, P. (2008) Genevestigator V3: A Reference Expression  
899 Database for the Meta-Analysis of Transcriptomes Y. Van de Peer, ed. *Adv.*  
900 *Bioinformatics*, 2008, 420747. Available at: <https://doi.org/10.1155/2008/420747>.
- 901 Johansson, K., El-Ahmad, M., Friemann, R., Jörnvall, H., Markovič, O. and Eklund, H.  
902 (2002) Crystal structure of plant pectin methylesterase. *FEBS Lett.*, 514, 243–249.
- 903 Jolie, R.P., Duvetter, T., Loey, A.M. Van and Hendrickx, M.E. (2010) Pectin methylesterase  
904 and its proteinaceous inhibitor: A review. *Carbohydr. Res.*, 345, 2583–2595.
- 905 Kent, L.M., Loo, T.S., Melton, L.D., Mercadante, D., Williams, M.A.K. and Jameson, G.B.  
906 (2016) Structure and properties of a non-processive, salt-requiring, and acidophilic  
907 pectin methylesterase from *Aspergillus Niger* provide insights into the key determinants  
908 of processivity control. *J. Biol. Chem.*, 291, 1289–1306.
- 909 Kumpf, R.P., Shi, C.-L., Larrieu, A., Sto, I.M., Butenko, M.A., Peret, B., Riiser, E.S.,  
910 Bennett, M.J. and Aalen, R.B. (2013) Floral organ abscission peptide IDA and its  
911 HAE/HSL2 receptors control cell separation during lateral root emergence. *Proc. Natl.*  
912 *Acad. Sci.*, 110, 5235–5240. Available at:

- 913 <http://www.pnas.org/cgi/doi/10.1073/pnas.1210835110>.
- 914 Leroux, C., Bouton, S., Kiefer-Meyer, M.-C., et al. (2015) PECTIN METHYLESTERASE48  
915 Is Involved in Arabidopsis Pollen Grain Germination. *Plant Physiol.*, 167, 367–380.  
916 Available at: <http://www.plantphysiol.org/lookup/doi/10.1104/pp.114.250928>.
- 917 Lin, T.-P., Liu, C.-C., Chen, S.-W. and Wang, W.-Y. (1989) Purification and  
918 Characterization of Pectinmethylesterase from *Ficus awkeotsang* Makino Achenes .  
919 *Plant Physiol.*, 91, 1445–1453.
- 920 Malamy, J.E. and Benfey, P.N. (1997) <Malamy benfey paper.pdf> . , 44, 33–44.
- 921 Markovič, O. and Janeček, Š. (2004) Pectin methylesterases: Sequence-structural features and  
922 phylogenetic relationships. *Carbohydr. Res.*, 339, 2281–2295.
- 923 Markovič, O. and Kohn, R. (1984) Mode of pectin deesterification by *Trichoderma reesei*  
924 pectinesterase. *Experientia*, 40, 842–843.
- 925 Mercadante, D., Melton, L.D., Jameson, G.B. and Williams, M.A.K. (2014) Processive pectin  
926 methylesterases: the role of electrostatic potential, breathing motions and bond cleavage  
927 in the rectification of Brownian motions. *PLoS One*, 9, e87581. Available at:  
928 <http://www.ncbi.nlm.nih.gov/pubmed/24503943> [Accessed June 5, 2020].
- 929 Mercadante, D., Melton, L.D., Jameson, G.B., Williams, M.A.K. and Simone, A. De (2013)  
930 Substrate dynamics in enzyme action: Rotations of monosaccharide subunits in the  
931 binding groove are essential for pectin methylesterase processivity. *Biophys. J.*, 104,  
932 1731–1739. Available at: <http://dx.doi.org/10.1016/j.bpj.2013.02.049>.
- 933 Micheli, F. (2001) Pectin methylesterases: Cell wall enzymes with important roles in plant  
934 physiology. *Trends Plant Sci.*, 6, 414–419.
- 935 Milani, P., Gholamirad, M., Traas, J., Arnéodo, A., Boudaoud, A., Argoul, F. and Hamant, O.  
936 (2011) In vivo analysis of local wall stiffness at the shoot apical meristem in *Arabidopsis*  
937 using atomic force microscopy. *Plant J.*, 67, 1116–1123.
- 938 Nguyen-Kim, H., San Clemente, H., Balliau, T., Zivy, M., Dunand, C., Albenne, C. and  
939 Jamet, E. (2016) *Arabidopsis thaliana* root cell wall proteomics: Increasing the proteome  
940 coverage using a combinatorial peptide ligand library and description of unexpected Hyp  
941 in peroxidase amino acid sequences. *Proteomics*, 16, 491–503. Available at:  
942 <http://doi.wiley.com/10.1002/pmic.201500129> [Accessed May 22, 2019].
- 943 Peaucelle, A., Braybrook, S.A., Le Guillou, L., Bron, E., Kuhlemeier, C. and Höfte, H. (2011)  
944 Pectin-Induced Changes in Cell Wall Mechanics Underlie Organ Initiation in  
945 *Arabidopsis*. *Curr. Biol.*, 21, 1720–1726. Available at:  
946 <http://www.sciencedirect.com/science/article/pii/S0960982211009638>.

- 947 Peaucelle, A., Louvet, R., Johansen, J.N., et al. (2011) The transcription factor  
948 BELLRINGER modulates phyllotaxis by regulating the expression of a pectin  
949 methylesterase in Arabidopsis. *Development*, 138, 4733–4741.
- 950 Peaucelle, A., Louvet, R., Johansen, J.N., Höfte, H., Laufs, P., Pelloux, J. and Mouille, G.  
951 (2008) Arabidopsis phyllotaxis is controlled by the methyl-esterification status of cell-  
952 wall pectins. *Curr. Biol.*, 18, 1943–8. Available at:  
953 <http://www.ncbi.nlm.nih.gov/pubmed/19097903>.
- 954 Peaucelle, A., Wightman, R. and Höfte, H. (2015) The Control of Growth Symmetry  
955 Breaking in the Arabidopsis Hypocotyl. *Curr. Biol.*, 25, 1746–1752.
- 956 Pelletier, S., Orden, J. Van, Wolf, S., et al. (2010) A role for pectin de-methylesterification in  
957 a developmentally regulated growth acceleration in dark-grown Arabidopsis hypocotyls.  
958 *New Phytol.*, 188, 726–739.
- 959 Pelloux, J., Rustérucchi, C. and Mellerowicz, E.J. (2007) New insights into pectin  
960 methylesterase structure and function. *Trends Plant Sci.*, 12, 267–277.
- 961 Peng, C.C., Hsiao, E.S.L., Ding, J.L.C. and Tzen, J.T.C. (2005) Functional expression in  
962 *Pichia pastoris* of an acidic pectin methylesterase from jelly fig (*Ficus awkeotsang*). *J.*  
963 *Agric. Food Chem.*, 53, 5612–5616.
- 964 Refrégier, G., Pelletier, S., Jaillard, D. and Höfte, H. (2004) Interaction between wall  
965 deposition and cell elongation in dark-grown hypocotyl cells in Arabidopsis. *Plant*  
966 *Physiol.*, 135, 959–968.
- 967 Ren, C. and Kermodé, A.R. (2000) An increase in pectin methyl esterase activity  
968 accompanies dormancy breakage and germination of yellow cedar seeds. *Plant Physiol.*,  
969 124, 231–242. Available at: [/pmc/articles/PMC59138/?report=abstract](https://pubmed.ncbi.nlm.nih.gov/11423142/) [Accessed June  
970 30, 2020].
- 971 Ridley, B.L., O’Neill, M.A. and Mohnen, D. (2001) Pectins: Structure, biosynthesis, and  
972 oligogalacturonide-related signaling. *Phytochemistry*, 57, 929–967. Available at:  
973 <https://pubmed.ncbi.nlm.nih.gov/11423142/> [Accessed November 5, 2020].
- 974 Salamin, K., Sriranganadane, D., Léchenne, B. and Jousson, O. (2010) Endogenous Secreted  
975 Subtilisin in *Pichia pastoris* GS115 and KM71 Strains 1 2. Available at:  
976 <http://aem.asm.org/> [Accessed June 11, 2020].
- 977 San Clemente, H. and Jamet, E. (2015) WallProtDB, a database resource for plant cell wall  
978 proteomics. *Plant Methods*, 11, 1–7.
- 979 Savary, B.J. (2001) Perfusion chromatography separation of the tomato fruit-specific pectin  
980 methylesterase from a semipurified commercial enzyme preparation. *Prep. Biochem.*

- 981 *Biotechnol.*, 31, 241–258.
- 982 Savary, B.J., Vasu, P., Cameron, R.G., McCollum, T.G. and Nuñez, A. (2013) Structural  
983 Characterization of the Thermally Tolerant Pectin Methyltransferase Purified from Citrus  
984 sinensis Fruit and Its Gene Sequence. *J. Agric. Food Chem.*, 61, 12711–12719. Available  
985 at: <https://doi.org/10.1021/jf403914u>.
- 986 Savary, B.J., Vasu, P., Nunez, A. and Cameron, R.G. (2010) Identification of thermolabile  
987 pectin methyltransferases from sweet orange fruit by peptide mass fingerprinting. *J. Agric.*  
988 *Food Chem.*, 58, 12462–12468.
- 989 Sénéchal, F., Graff, L., Surcouf, O., et al. (2014) Arabidopsis PECTIN  
990 METHYLESTERASE17 is co-expressed with and processed by SBT3.5, a subtilisin-like  
991 serine protease. *Ann. Bot.*, 114, 1161–1175.
- 992 Sénéchal, F., L’Enfant, M., Domon, J.M., et al. (2015) Tuning of pectin methylesterification:  
993 Pectin methyltransferase inhibitor 7 modulates the processive activity of co-expressed  
994 pectin methyltransferase 3 in a pH-dependent manner. *J. Biol. Chem.*, 290, 23320–23335.
- 995 Sénéchal, F., Wattier, C., Rustérucchi, C. and Pelloux, J. (2014) Homogalacturonan-modifying  
996 enzymes: Structure, expression, and roles in plants. *J. Exp. Bot.*, 65, 5125–5160.
- 997 Søndergaard, C.R., Olsson, M.H.M., Rostkowski, M. and Jensen, J.H. (2011) Improved  
998 treatment of ligands and coupling effects in empirical calculation and rationalization of p  
999 K a values. *J. Chem. Theory Comput.*, 7, 2284–2295. Available at:  
1000 <https://pubmed.ncbi.nlm.nih.gov/26606496/> [Accessed November 24, 2020].
- 1001 Swarup, K., Benková, E., Swarup, R., et al. (2008) The auxin influx carrier LAX3 promotes  
1002 lateral root emergence. *Nat. Cell Biol.*, 10, 946–954.
- 1003 Thonar, C., Liners, F. and Cutsem, P. Van (2006) Polymorphism and modulation of cell wall  
1004 esterase enzyme activities in the chicory root during the growing season. *J. Exp. Bot.*, 57,  
1005 81–89. Available at: [http://academic.oup.com/jxb/article/57/1/81/442028/Polymorphism-](http://academic.oup.com/jxb/article/57/1/81/442028/Polymorphism-and-modulation-of-cell-wall-esterase)  
1006 [and-modulation-of-cell-wall-esterase](http://academic.oup.com/jxb/article/57/1/81/442028/Polymorphism-and-modulation-of-cell-wall-esterase) [Accessed January 6, 2020].
- 1007 Voxeur, A., Habrylo, O., Guénin, S., et al. (2019) Oligogalacturonide production upon  
1008 Arabidopsis thaliana-Botrytis cinerea interaction. *Proc. Natl. Acad. Sci. U. S. A.*, 116,  
1009 19743–19752.
- 1010 Wachsman, G., Zhang, J., Moreno-Risueno, M.A., Anderson, C.T. and Benfey, P.N. (2020)  
1011 Cell wall remodeling and vesicle trafficking mediate the root clock in Arabidopsis.  
1012 *Science*, 370, 819–823.
- 1013 Wade, R.C., Gabdoulline, R.R. and Rienzo, F. De (2001) Protein interaction property  
1014 similarity analysis. *Int. J. Quantum Chem.*, 83, 122–127. Available at:

- 1015 <http://doi.wiley.com/10.1002/qua.1204> [Accessed November 17, 2020].
- 1016 Wang, J., Cieplak, P. and Kollman, P.A. (2000) *How Well Does a Restrained Electrostatic*  
1017 *Potential (RESP) Model Perform in Calculating Conformational Energies of Organic*  
1018 *and Biological Molecules? Keywords: additive force field; nonadditive force field;*  
1019 *restrained electrostatic potential (RESP); torsional angle parameterization*, Available at:  
1020 [www.amber.ucsf.edu/amber/](http://www.amber.ucsf.edu/amber/) [Accessed November 24, 2020].
- 1021 Wang, X., Wilson, L. and Cosgrove, D.J. (2020) Pectin methylesterase selectively softens the  
1022 onion epidermal wall yet reduces acid-induced creep. *J. Exp. Bot.*, 71, 2629–2640.  
1023 Available at: <https://pubmed.ncbi.nlm.nih.gov/32006044>.
- 1024 Willats, W.G.T., Knox, J.P. and Mikkelsen, J.D. (2006) Pectin: New insights into an old  
1025 polymer are starting to gel. *Trends Food Sci. Technol.*, 17, 97–104.
- 1026 Willats, W.G.T., Orfila, C., Limberg, G., et al. (2001) Modulation of the degree and pattern of  
1027 methyl-esterification of pectic homogalacturonan in plant cell walls: Implications for  
1028 pectin methyl esterase action, matrix properties, and cell adhesion. *J. Biol. Chem.*, 276,  
1029 19404–19413.
- 1030 Wolf, S., Rausch, T. and Greiner, S. (2009) The N-terminal pro region mediates retention of  
1031 unprocessed type-I PME in the Golgi apparatus. *Plant J.*, 58, 361–375.
- 1032

1033 **Figures**

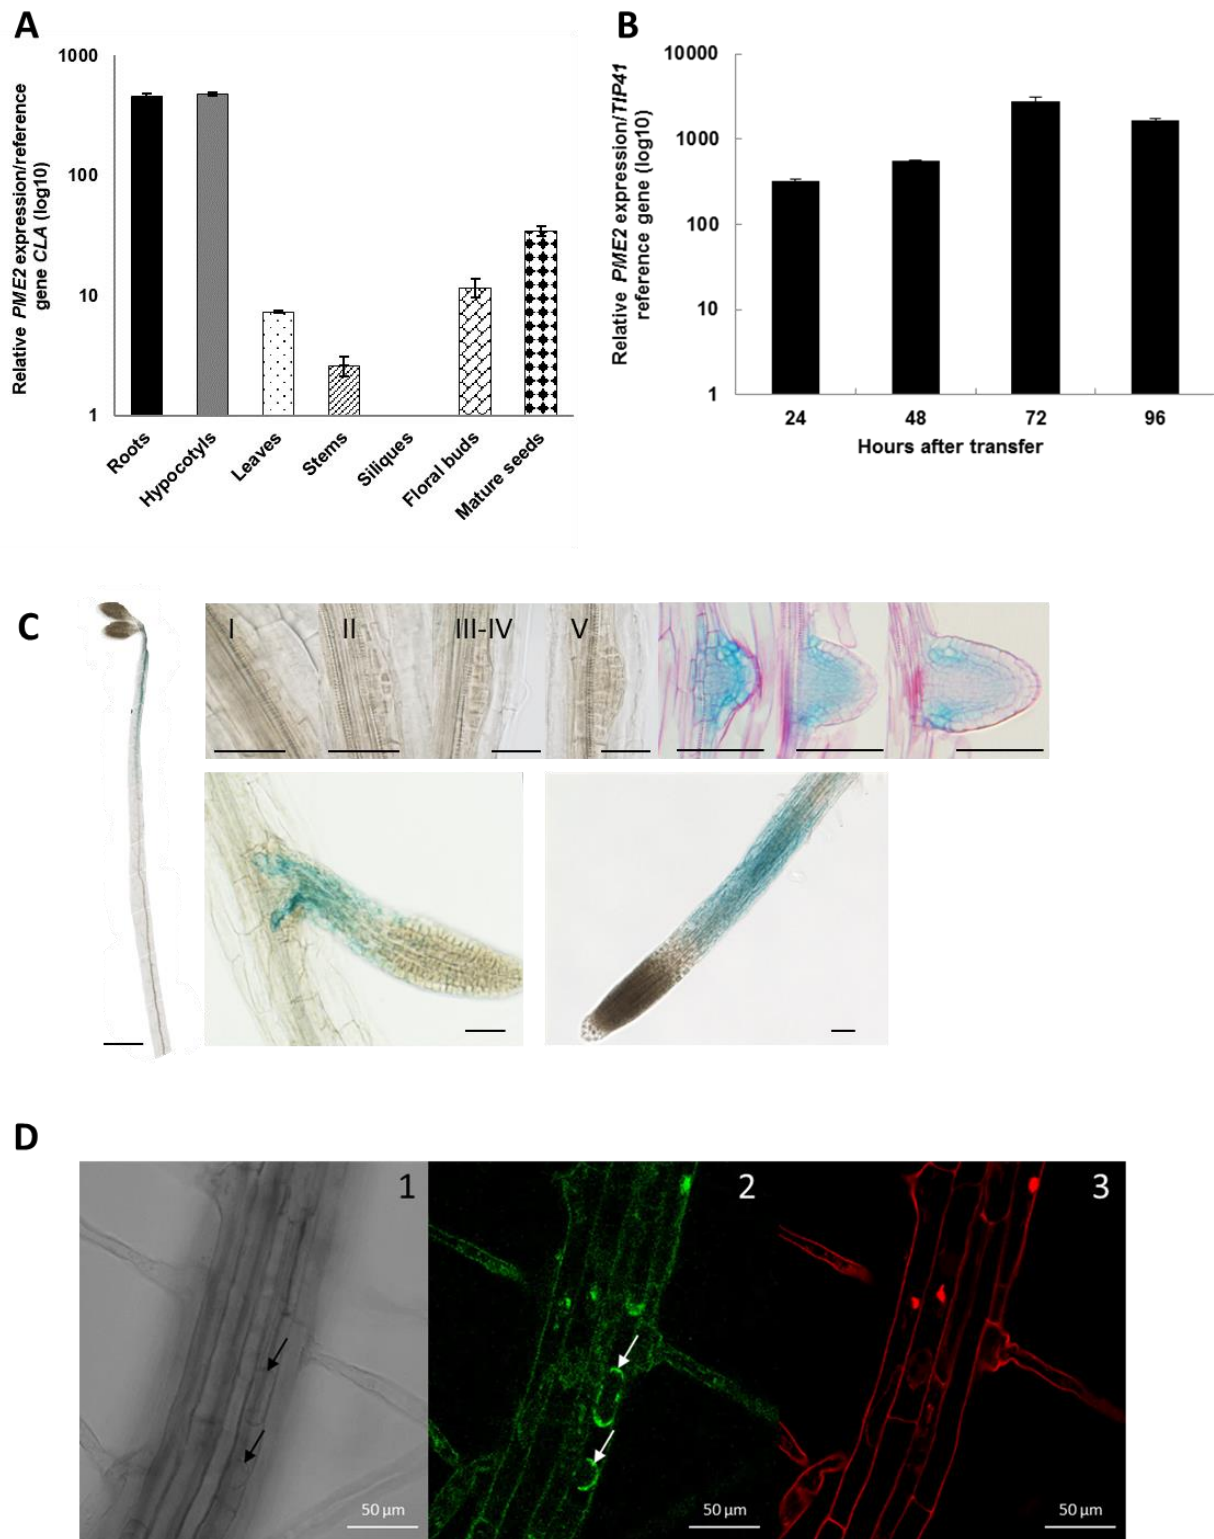

1034

1035 **Figure 1: *AtPME2* gene is highly expressed in roots and dark-grown hypocotyls and**  
1036 **targeted at the cell wall**

1037 *AtPME2* gene expression was quantified (A) on different organs and quantified using  
1038 *CLATHRIN* (*At5g46630*) as a reference gene, (B) on various stages of dark-grown hypocotyl  
1039 elongation (up to 96h post-induction) and quantified using *TIP41* (*At4G34270*) as a reference  
1040 gene and (C) Localization of *AtPME2* promoter activity during in 4 day-old dark-grown



1041 hypocotyl (left, scale bar: 1 mm) and lateral root initiation (right, scale bars: 100  $\mu$ m). **(D)**  
1042 Subcellular localization of the AtPME2 protein. Arabidopsis plants were transformed with  
1043 *Rhizobium radiobacter* containing a 35S::AtPME2-GFP construct and GFP fluorescence was  
1044 imaged in 6-day old roots under confocal microscope. 1. Brightfield imaging of plasmolyzed  
1045 root cells, 2. AtPME2-GFP fused protein signal, 3. Propidium iodide staining of the cell  
1046 walls. Scale bar: 50  $\mu$ m; Arrows indicate retraction of the tonoplast due to plasmolysis.  
1047



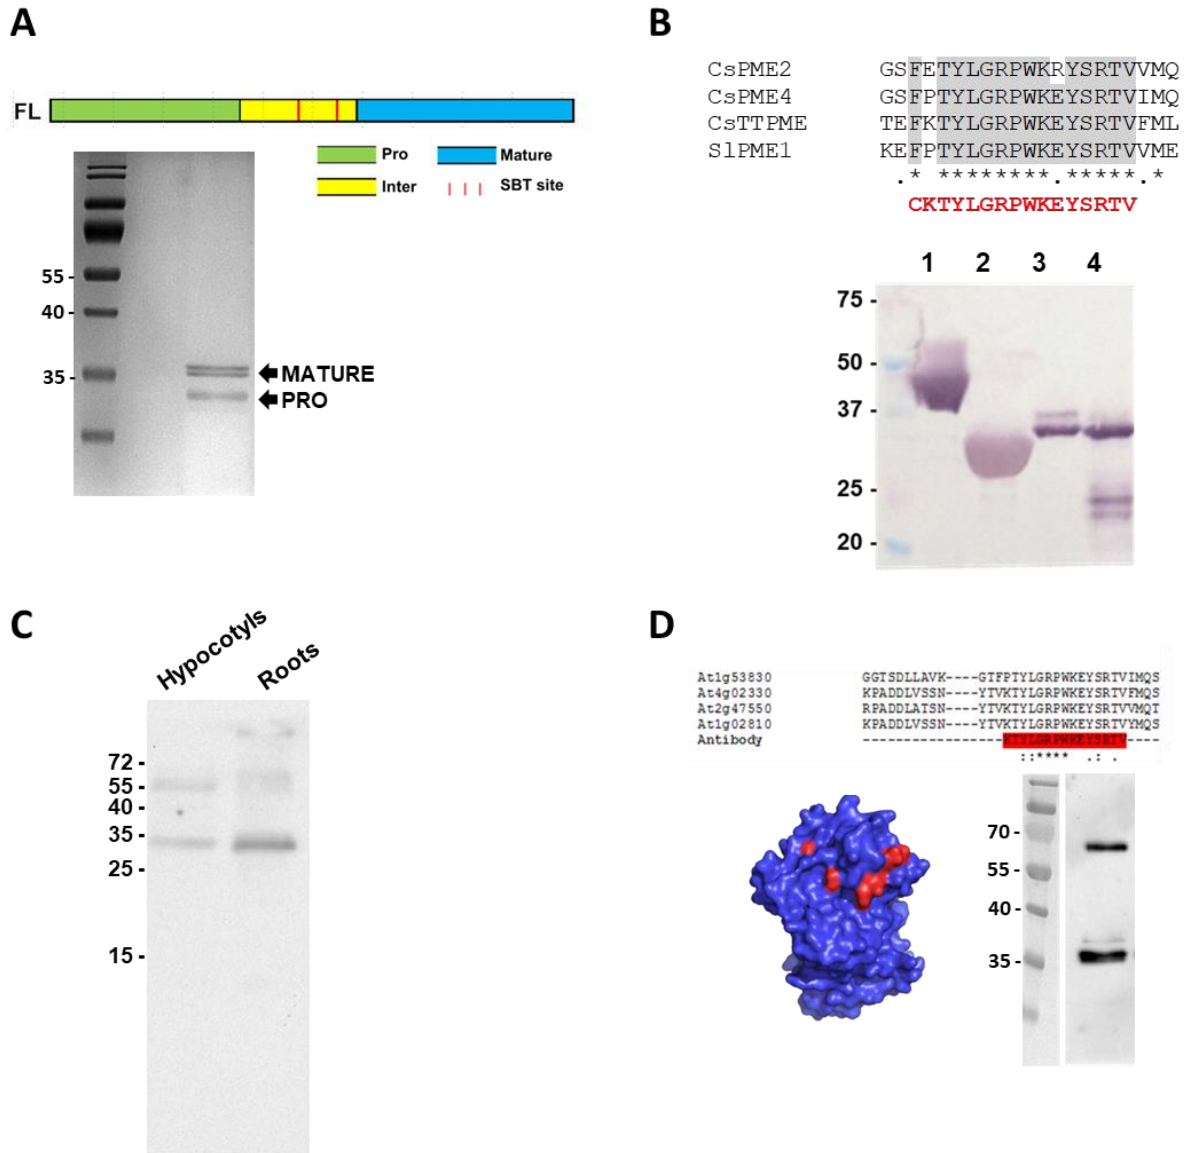

1048  
1049  
1050  
1051  
1052  
1053  
1054  
1055  
1056  
1057  
1058  
1059  
1060  
1061  
1062  
1063  
1064  
1065

**Figure 2: AtPME2 is effectively produced in *Pichia pastoris***

(A) *AtPME2* mature protein recovered from *Pichia pastoris* culture supernatant (purified by ion exchange chromatography) was separated by SDS-PAGE (Coomassie-Blue stained gel). Closely related bands at a MW ~35 kDa represent the two forms of processed enzymes (see scheme of protein structure above, including processing motifs). The lower band represent the PRO part. (B) Design of a peptide antibody that can detect sweet orange and tomato PME isoforms. The generic anti PME antibody was designed on a highly conserved part of the mature protein (see alignment). Western blot analysis allowed detection of purified PMEs, 1: CsTT-PME (*Citrus sinensis* thermally-tolerant isozyme; (Savary *et al.*, 2013)), 2: CsPME2 (*C. sinensis* fruit-specific salt-independent isozyme, (Savary *et al.*, 2010)), 3: CsPME4 (*C. sinensis* salt-dependent isozyme, (Savary *et al.*, 2010)), and SIPME1 (*Solanum lycopersicum* isozyme (Savary, 2001)). (C) Western blot analysis of cell-wall-enriched protein extracts from 7 day-old roots and 4 day-old dark grown hypocotyls using the anti PME antibody. Both processed and non-processed forms of PME can be detected. (D) Western blot detection of *AtPME2* purified by cation-exchange chromatography from concentrated *Pichia* culture media.

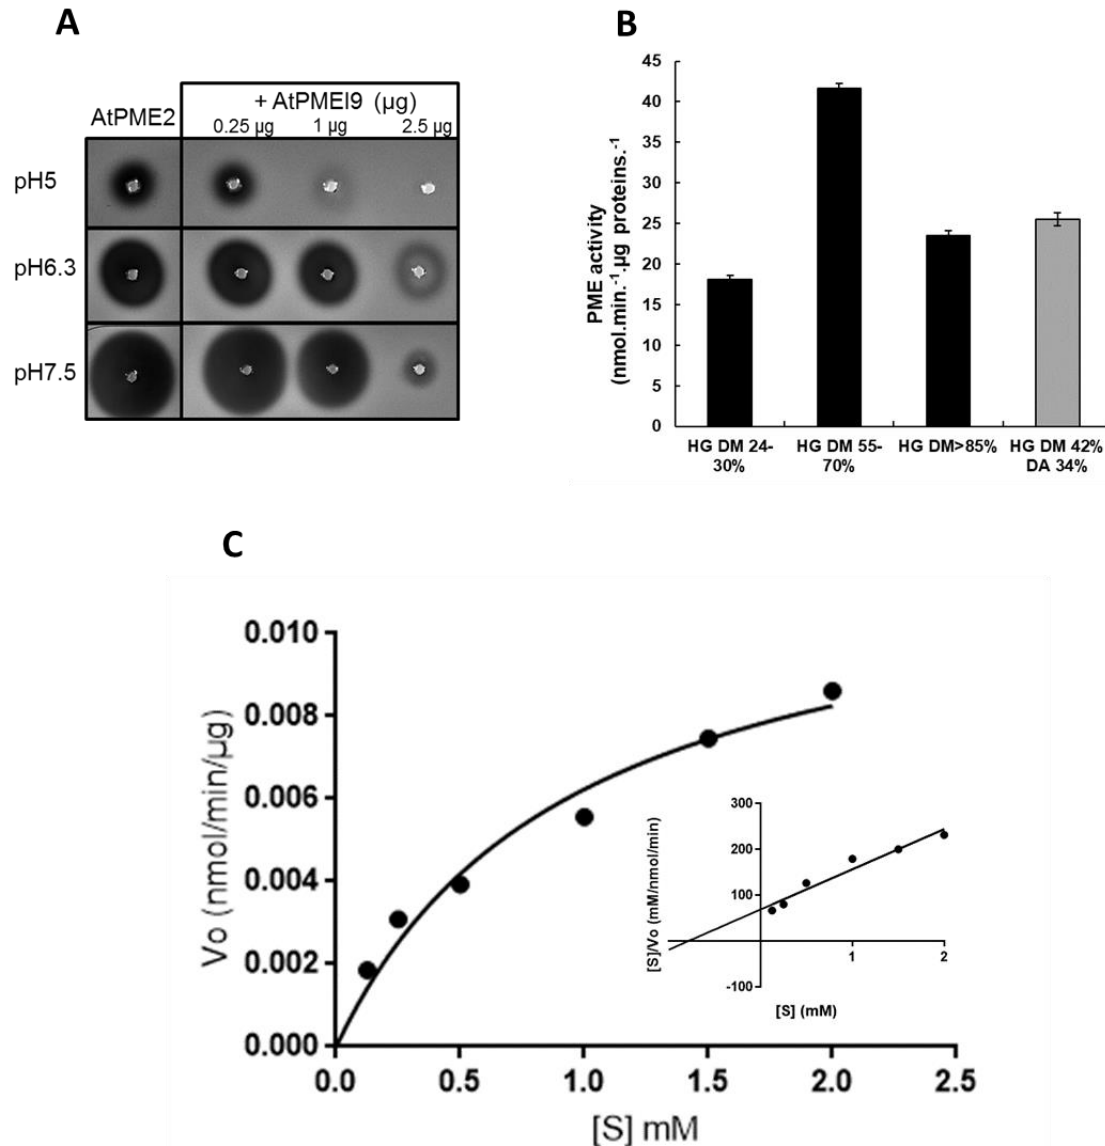

1066

1067 **Figure 3: AtPME2 is active and can be inhibited by PME1**

1068 (A) pH-dependence of AtPME2 activity. Activity of purified AtPME2 was assessed at three  
 1069 distinct pH (5, 6.3 and 7.5) with increasing quantities of the pH-independent AtPMEI9.  
 1070 Activity was determined with the gel diffusion assay using pectins DM 85% as a substrate and  
 1071 ruthenium red staining. The diameter of the halo reflects PME activity. (B) Substrate  
 1072 specificity of AtPME2. Activity of purified AtPME2 on pectic substrates with increasing  
 1073 degree of methylesterification (DM) was determined at an optimal pH of 7.5. Data represent  
 1074 the mean  $\pm$  SE of three to five replicates. HG: Homogalacturonan, DA: Degree of acetylation.  
 1075 (C) Determination of  $K_m$  and  $V_{max}$  for AtPME2. Activity was assessed using various  
 1076 concentrations of pectins DM 55-10% at 37°C and pH 7.5.

1077

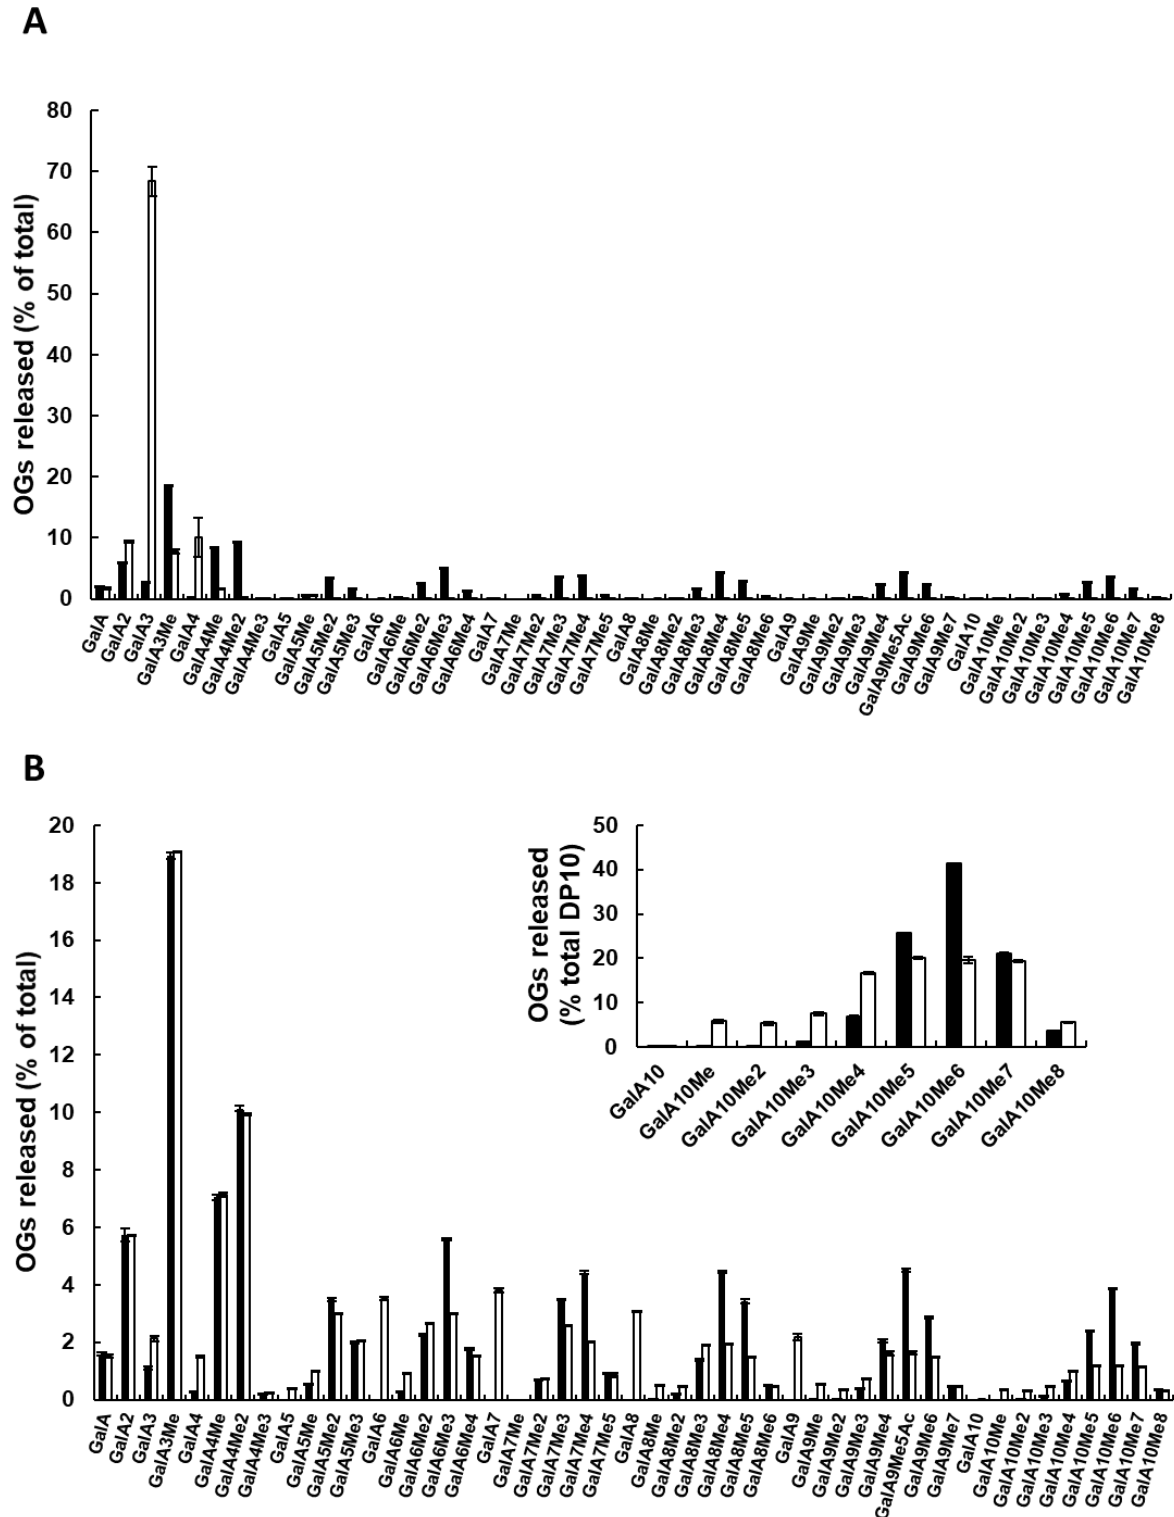

1078

1079 **Figure 4: Determination of AtPME2 mode of action using an LC-MS/MS**

1080 Comparisons of the oligogalacturonides (OGs) produced following demethylesterification by  
 1081 AtPME2 at (A) pH 8 and (B) pH 5. A population of OGS of various degree of polymerization  
 1082 (DP) and degree of methylesterification (DM) was first generated by action of *Aspergillus*  
 1083 *aculeatus* polygalacturonase during 2 h at 40°C. After heat denaturation of the PGs, the OGS  
 1084 were incubated overnight at 40°C with buffer (black bars) or isoactivities of AtPME2 at pH 5

1085 and pH 8 (white bars). OGs were separated using SEC and analyzed using MS/MS. Data  
1086 represent the mean  $\pm$  SE of three replicates.  
1087

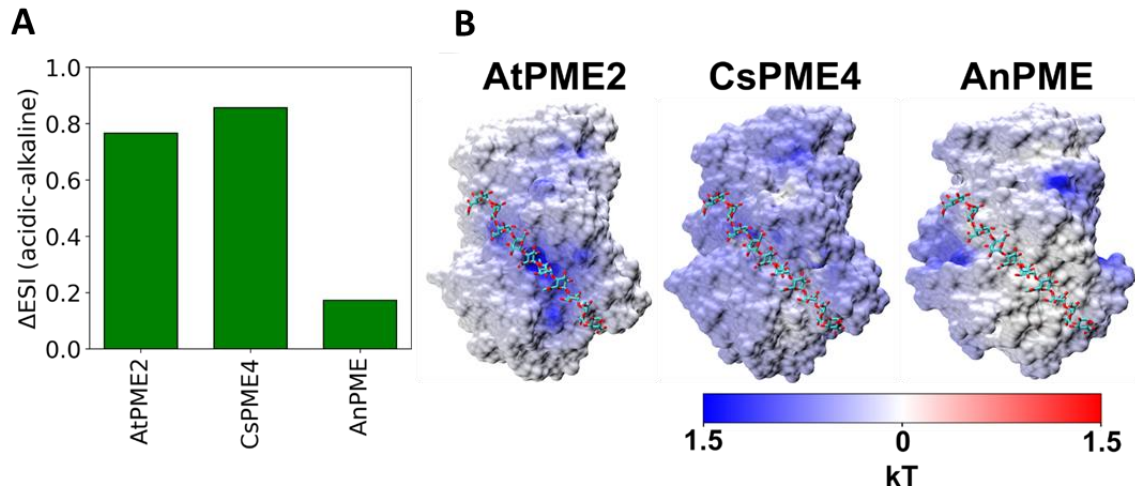

1088

1089 **Figure 5: Electrostatic potential of AtPME2 is pH-dependent**

1090 (A) Difference between the electrostatic similarity indices of AtPME2, CsPME4 and AnPME  
1091 at pH 5.0 (acidic) and pH 8.0 (basic). (B) Electrostatic potentials of the three PME isoforms  
1092 projected on the protein surfaces. The electrostatic potentials are the resultant of the  
1093 subtraction between the electrostatic potentials obtained at pH 8.0 from the one obtained at  
1094 pH 5.0 for each protein. The potentials of AnPME and CsPME4 have been then divided by  
1095 the electrostatic potential of AtPME2 to better show the comparison with AtPME2.  
1096

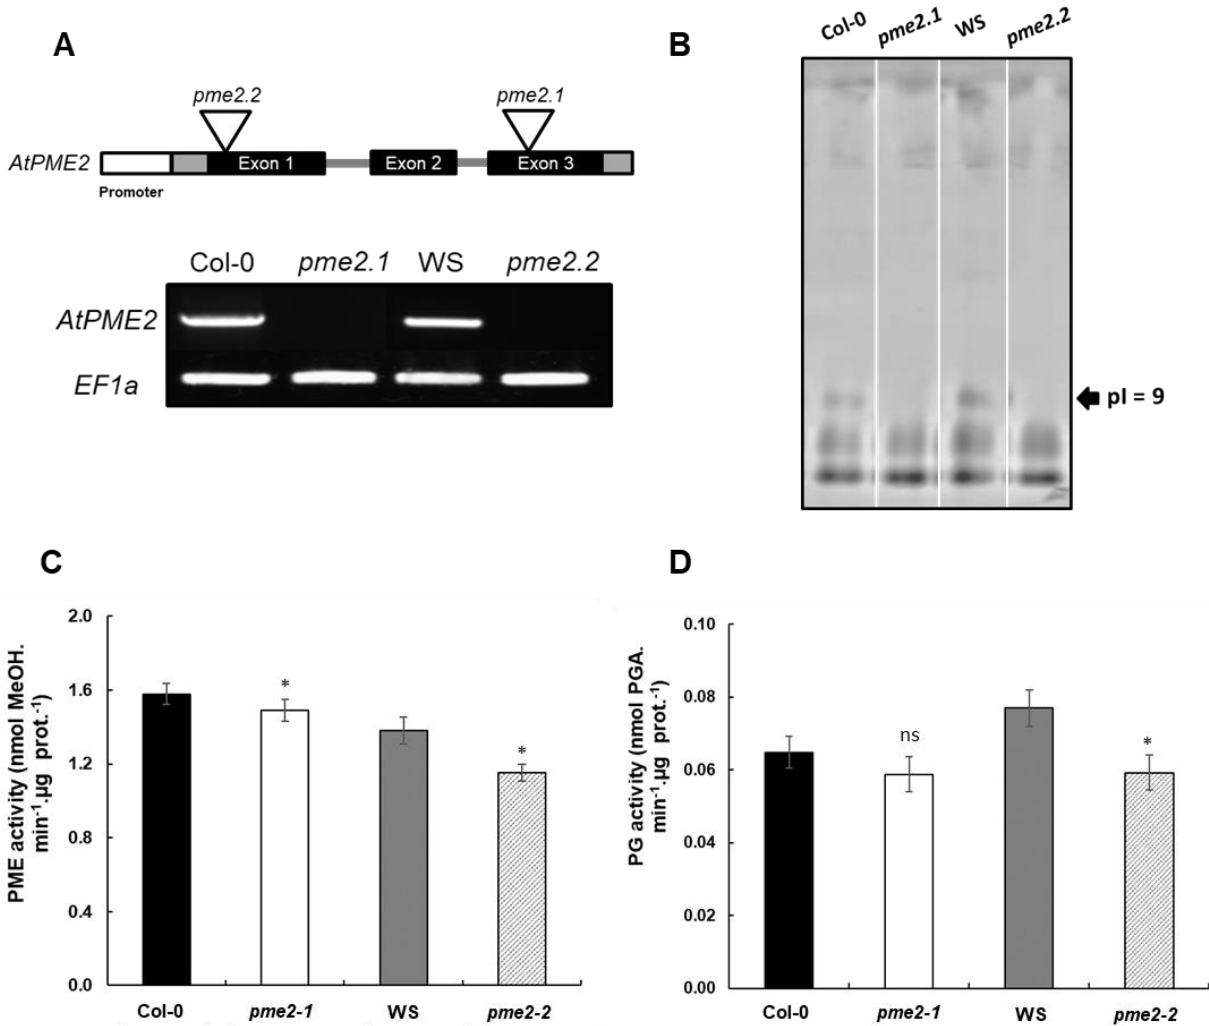

1097

1098 **Figure 6: Defect in AtPME2 leads changes in pectin remodeling enzyme activities**  
 1099 (A) Schematic representation of *AtPME2* gene structure and localisation of the T-DNA  
 1100 insertions for *pme2-1* (GK-835A09, in the third exon) and *pme2-2* (FLAG\_445B05, in the  
 1101 first exon). PCR analysis of *pme2-1*, *pme2-2* and WT (Col-0 and WS) hypocotyl cDNAs  
 1102 using specific primers flanking the T-DNA insertion sites. *EF1α* was used as reference gene.  
 1103 (B) Isoelectric focusing (IEF) of cell wall-enriched protein extracts from 4 day-old dark-  
 1104 grown hypocotyls of wild type Col-0/WS and *pme2-1/pme2-2* mutants. The same PME  
 1105 activities (15 mU) were loaded for each genotype. PME isoforms were separated and  
 1106 zymogram of PME activity was performed by incubating the gel with pectins (DM > 85 %),  
 1107 followed by ruthenium red staining. Similar observations were obtained from two  
 1108 independent experiments. Black arrow indicates the disappearance of an activity at a pI ~9 in  
 1109 *pme2* mutants. (C) Total PME activity of cell wall-enriched protein extracts from 4 day-old  
 1110 dark-grown hypocotyls of wild type Col-0/WS and *pme2-1/pme2-2* mutants. Data represent  
 1111 the means of PME activity in nmol of methanol.min<sup>-1</sup>/μg of protein<sup>-1</sup> ± SE of three  
 1112 independent protein extractions and three technical replicates (n=9). (D) Total PG activity of  
 1113 cell wall-enriched protein extracts from 4 day-old dark-grown hypocotyls of wild type Col-  
 1114 0/WS and *pme2-1/pme2-2* mutants. Data represent the means of PG activity in nmol of  
 1115 PGA.min<sup>-1</sup>/μg of protein<sup>-1</sup> ± SE of three independent protein extractions and three technical  
 1116 replicates (n=9). Significant differences (p<0.05\*) were determined according to Wilcoxon  
 1117 test. Non-significant differences are indicated with ns.  
 1118



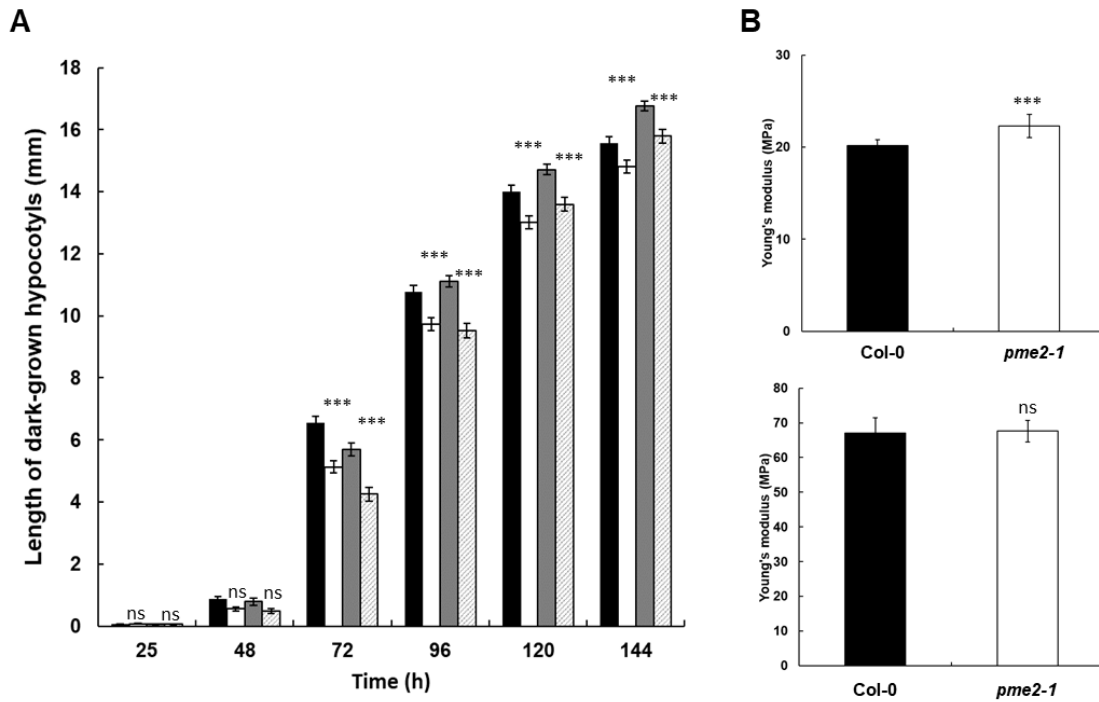

1119

1120

1121 **Figure 7: Defect in AtPME2 leads increased cell wall stiffness and reduced hypocotyl**  
1122 **length**

1123 (A) Growth kinematic analysis of etiolated hypocotyls of wild type Col-0 (black bar), WS  
1124 (grey bar), *pme2-1* (white bar) and *pme2-2* (hatched bar). Data represent the means of length  
1125 in mm  $\pm$  SE (n > 30) for each condition. (B) Cell wall stiffness of Col-0 (black bar) and  
1126 *pme2-1* (white bar) assessed by Atomic Force Microscopy on 3 day-old dark-grown  
1127 hypocotyls at the bottom part (bottom panel) and below the hook (top panel). Significant  
1128 differences (p<0.001\*\*\*) were determined according to Wilcoxon test. Non-significant  
1129 differences are indicated with ns.

1130

1131

1132

1133 **Supplemental material**

1134

1135

1136

1137

1138

```

PME2 peptide  MAPIKEFISKFSDFKNNKLIILSAAIALLLLASIVGIAATTTNQKNQKITTLSSTSHA
-----
PME2 peptide  IILKSVCSSTLYPELCSAVAATGGKELTSQKEVIEASLNLTTKAVKHNYFAVKKLIARRK
-----
PME2 peptide  GLTPREVTALHDCLETIDETLDELHVAVEDLHQYPKQKSLRKHADDLKTLLISSAITNQGT
-----
PME2 peptide  CLDGFSYDDADRKVRKALLKGVHVEHMCSNALAMIKNMTETDIANFELRDKSSTFTNNN
-----
PME2 peptide  NRKLEKVEVTGDLSDGWPKWLSVGDRLLLQGSIKADATVADDGSGDFTTVAAAVAAAPEK
-----ADATVADDGSGDFTTVAAAVAAAPEK
*****
PME2 peptide  SNKRFVIHIKAGVYRENVEVTKKTNIMFLGDGRKTIITGSRNVVDGSTITFHSATVAAV
-----ENVEVIKK-----
*****
PME2 peptide  GERFLARDITFQNTAGPSKHQAVALRVGSDFSAFYQCDMFAYQDTLYVHSNRQFFVKCHI
-----
PME2 peptide  TGTVDFI FGNAAVLQDCDINARRPNSGQKNMVTAQGRSDPNQNTGIVIQNCRIIGTSDL
-----SDPNQNTGIVIQNCRIIGTSDL
*****
PME2 peptide  LAVKGTFFPTYLGRPWKEYSRTVIMQSDISDVIRPEGWHEWSGSFALDTLYREYLNRRGGG
-----LAVKGTFFPTYLGRPWK-----
*****
PME2 peptide  AGTANRVKWKGYKVIITSDTEAQPFTAGQFIGGGWLASTGFPFSLSL 587
-----

```

1139

1140 **Supplemental Figure 1:** Identification of peptides mapping the mature part of AtPME2 in  
1141 cell wall-enriched extracts of Col-0 dark-grown hypocotyls using nano LC-MS/MS. The full  
1142 length amino-acid sequence is shown, with PRO part in purple, putative processing motifs  
1143 (RKLK, RLL) are in green.  
1144

**A**

|        |          |                               |
|--------|----------|-------------------------------|
| FL     | FL-F     | CTGCA Ggagccacaacaacaac       |
|        | FL-R     | GCGGCCG Caagacttaacgagaaagga  |
| Δ4FL   | Δ4FL-F   | CTGCA Ggaaac caaaacaaaaccacaa |
|        | Δ4FL-R   | GCGGCCG Caagacttaacgagaaagga  |
| Δ8FL   | Δ8FL-F   | CTGCA Ggaaac caaaaatcacactc   |
|        | Δ8FL-R   | GCGGCCG Caagacttaacgagaaagga  |
| Δ12FL  | Δ12FL-F  | CTGCA Ggaaacactctatcttcacatca |
|        | Δ12FL-R  | GCGGCCG Caagacttaacgagaaagga  |
| Δ16FL  | Δ16FL-F  | CTGCA Ggatcgcacacacgcc        |
|        | Δ16FL-R  | GCGGCCG Caagacttaacgagaaagga  |
| Δ20FL  | Δ20FL-F  | CTGCA Ggagccattctaaaatctgttg  |
|        | Δ20FL-R  | GCGGCCG Caagacttaacgagaaagga  |
| Δ42FL  | Δ42FL-F  | CTGCA Ggaaaccgaggaaagaga      |
|        | Δ42FL-R  | GCGGCCG Caagacttaacgagaaagga  |
| Δ115FL | Δ115FL-F | CTGCA Ggacctaagcaaaaatctctga  |
|        | Δ115FL-R | GCGGCCG Caagacttaacgagaaagga  |
| Δ192FL | Δ192FL-F | CTGCA Ggaaagtctcaacctcacc     |
|        | Δ192FL-R | GCGGCCG Caagacttaacgagaaagga  |
| Δ212FL | Δ212FL-F | CTGCA Ggattagacagtgatggatgg   |
|        | Δ212FL-R | GCGGCCG Caagacttaacgagaaagga  |

**B**

1 MAPIKEFISK FSDFKNNKKL ILSSAIALL LLASTVGVIA **TTTNQNKQR**  
↑ ↑ ↑  
FL Δ4 Δ8

51 **ITTLSSSTSHA** ILKSVCSSTL YPELCFSAVA ATGGKELTSQ KEVIEASLNI  
↑ ↑ ↑ ↑  
Δ12 Δ16 Δ20 Δ42

101 **TTKAVKHNYF** AVKCLIARKK GLTPREVTAL HDCLETIDET LDELHVAVED

151 **LHQYPKQKSL** RKHADDLKTLL ISSAITNQGT CLDGFSDYDDA DRKVRKALLR  
↑  
Δ115

201 **GQVHVEHMCS** NALAMIKNMT ETDIANFELR **DKSSTFTNNN NRKLEKVTGD**  
↑  
Δ192

251 **LDSDGWPKWL** SVGDRRLQGG **STIKADATVA** DDGSGDFTTV AA AVAAAPEK  
↑ ↑  
Δ212 MAT

301 **SNKRFVVIHK** AGVYRENVEV TKKKTNIMFL GDGRGKTIIT GSRNVVDGST

351 **TFHSATVA AV** GERFLARDIT FQNTAGPSKH QAVALRVGSD FSAFYQCDMF

401 **AYQDTLYVHS** NRQFFVKCHI TGTVDIFFGN AAVLQDCDI NARRPNSGQK

451 **NMVT AQGRSD** PNQNTGIVIQ NCRIGGTS DL LAVKGTFTPT Y LGRPWKEYSR

501 **TVIMQSDISD** VIRPEGWHEW SG SFALDTLT YREYLN RGGG AGTANRVKWK

551 **GYKVITSDTE** AQPFTAGQFI GGGGWLASTG FPFSLSL\*

1145

1146 **Supplemental Figure 2: (A)** Primers used for the amplification of full length AtPME2  
 1147 sequence and deletion mutants of the PRO part. **(B)** AtPME2 amino-acid sequence  
 1148 highlighting the localization of the sequences used for expression in *Pichia pastoris*.

```

1  MAPIKEFISK  FSDFKNNKKL  ILSSAAIALL  LLASIVGIAA  TTTNQNKNQK
51  ITTLLSSTSHA  ILKSVCSTL  YPELCFSAVA  ATGGKELTSQ  KEVIEASLNL
101  TTKAVKHNYF  AVKKLIAKRK  GLTPREVTAL  HDCLETIDET  LDELHVAVED
151  LHQYPKQKSL  RKHADDLKT  ISSAITNQGT  CLDGFSYDDA  DRKVRKALLK
201  GQVHVEHMCS  NALAMIKNMT  ETDIANFELR  DKSSTFTNNN  NRKLKEVTGD
251  LDSDGWPKWL  SVGDRRL  L
      QG  STIKADATVA  DDGSGDFTTV  AAATAAAPEK
301  SNKRFVIHIK  AGVYRENVEV  TKKKTNIMFL  GDGRGKTIIT  GSRNVVDGST
351  TFHSATVAAV  GERFLARDIT  FQNTAGPSKH  QAVALRVGSD  FSAFYQCDMF
401  AYQDTLYVHS  NRQFFVKCHI  TGTVDVDFGN  AAVALQDCDI  NARRPNSGQK
451  NMVTAQGRSD  PNQNTGLVIQ  NCRIGGTSDL  LAVKGTFTPT  LGRPWKKEYSR
501  TVIMQSDISD  VIRPEGWHEW  SGSFALDTLT  YREYLNRRGG  AGTANRVKWK
551  GYKVISDTE  AQPFTAGQFI  GGGGWLASTG  FPFSLSL

```

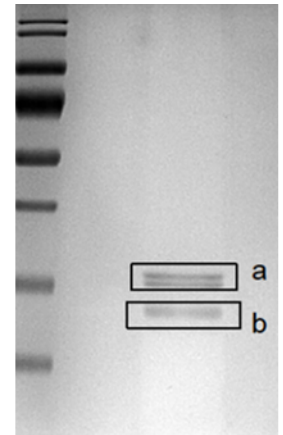

### Catalytic region tryptic peptides – 12 observed (2 truncated) (“Band a”)

| Position | Peptide sequences                                          |
|----------|------------------------------------------------------------|
| 75-300   | ADATVADDGSGDFTTVAAAVAAAPEK*                                |
| 316-322  | ENVEVTK*                                                   |
| 325-334  | TNIMFLGDGR                                                 |
| 344-363  | NVVDGSTTFHSATVAAVGER                                       |
| 368-379  | DITFQNTAGPSK                                               |
| 387-412  | VGSDFSAFYQCDMFAYQDTL YVHSNR                                |
| 451-458  | NMVTAQGR                                                   |
| 459-473  | SDPNQNTGIVIQNCR*                                           |
| 474-484  | IGGTSDLLAVK*                                               |
| 485-496  | GTFPTYLGRPWK*                                              |
| 501-532  | TVIMQSDISDVIRPEGWH (+EWSGSFALDTLTYR) – fragment observed   |
| 554-587  | VITSDTEAQPFTAGQFIGGG (+GWLASTGFPFSLSL) – fragment observed |

### PRO-region tryptic peptides – 7 observed (“Band b”)

| Position | Peptide sequences        |
|----------|--------------------------|
| 51-63    | ITLLSSTSHAILK            |
| 64-85    | SVCSSSTLYPELCFSAVAATGGK  |
| 107-113  | HNYFAVK                  |
| 169-192  | TLISSAITNQGTCLDGFSYDDADR |
| 201-217  | GQVHVEHMCSNALAMIK        |
| 218-230  | NMTETDIANFELR            |
| 233-242  | SSTFTNNNNR               |

\*Peptides observed in cell wall extract and indicated by sequence alignment in Supp Fig 1

1149

1150 **Supplemental Figure 3:** Identification of peptides mapping the PRO and mature part of  
1151 AtPME2 following cation exchange purification. Band **a** corresponds to the two proteins at  
1152 ~35 kDa while band **b** corresponds to the band below ~35kDa (see gel).  
1153

**A**

```

At3g62170      IPDKLEADK----LTIKSYLGRPWKKFATTVIIIGTEIGDLIKPEGWTEWQGEQN--HK
At2g47030      VPKRKLTPER----LTVATYLGPRWKKFSTTVIMSTEMGDLIRPEGWLIWDG-ESF--HK
At2g47040      VPKKLAER----LIVESYLGPRWKKFSTTVIINSEIGDVIIRPEGWLIWDG-ESF--HK
At2g26450      AANEDLKPVK----EEYKSYLGRPWKNYSRTIIMESKIENVIDPVGWLRWQETDFA--ID
At4g33230      APNEDLKPVK----AQFKSYLGRPWKPHSRTVVMESTIEDVIDPVGWLRWQETDFA--ID
At3g10710      SPLGDLTD-----VMTFLGRPWKNFSTTVIMDSYLHGFIIDRKGWLPWTG-DSA--PD
At5g04960      KPLDNLTD-----IQTFGLGRPWKDFSTTVIMKSFMDKFINPKGWLPWTG-DTA--PD
At5g10720      KAAPDLAEP----KSAMTFLGRPWKPYSRVFMQSYISDVIQPPVGWLEWNG-TIG--LD
At5g04970      GAAPDLAEP----KSTMTFLGRPWKPYSRVYIQSYISDVIQPPVGWLEWNG-TTG--LD
At4g03930      TASSDLDTAT----VKTYLGRPWRI FSTVAVLQSF IGDLVDPAGWTPWEG-ETG--LS
At1g11590      TASSDLDTAT----VKTYLGRPWRI FSTVAVMQSF IGDLVDPAGWTPWEG-ETG--LS
At3g27980      TTSSDLDTAT----VKTYLGRPWRI FSTVAVLQSF IGDLVDPAGWTPWEG-ETG--LS
At5g20860      RTSDLSFVK----HKYSSYLGRPWKYSRAIVMESYIDDAIAEGGWAGWLD-SGDEVLK
At5g51490      LPAPDLKPVV----GTVKTYMGRPWKFSRTVVLQTYLDNVVSPVGVWSPWIE-GSVFGLD
At5g51500      IPAPDLKPVV----RSVKTYMGRPWMMYSRTVVLKTYIDSVVSPVGVWSPWTK-GSTYGLD
At4g15980      TGDASYLPVK----AKNRAFGRPWKEFSRTIIMNTEIDDVIDPEGWLNWNG-TFA--LN
At3g47400      IAASDLKPVV----RAYKTYLGRPWQAYSRVTIMKTYIDNSISPLGWSFWLR-GSNFALN
At3g14300      SPNGNVT-----ATTYLGPRWKLFSKTVIMQSYIGSFVNPAGWLAWNS-TYDPPPR
At1g23200      ATA-----SETYLGPRWRSRHSRTVFMKCNLALVSPAGWLPWSG-SFA--LS
At5g64640      NGTEEYMKFQANPEGHKNFLGRPWKEFSRTVFNVCNLESLSIDPGWMPWNG-DFA--LK
At5g53370      LATPDLEASK----GSYPTYLGRPWKLYSRVVYMMSDMGDHDIPRGWLEWNG-PFA--LD
At5g49180      TGEPAYIPVK----SINKAYLGRPWKEFSRTIIMGTTIDDVIDPAGWLPWNG-DFA--LN
At5g09760      NGTEEYMKLFKANPKVHKNFLGRPWKDYSRVFIGCNLEALITPDGWLFWNG-DFA--LK
At4g02320      LAAPDLIPVQ----ANFKAYLGRPWQLYSRTVIMKSFIDDLVDPAGWLNWNG-DFA--LE
At4g02300      LAAPDLIPVK----ENFKAYLGRPWKYSRTVVIKSFIDDLIHPAGWLEGGK-DFA--LE
At4g00190      KGAPGVQ--L----GGVKTYLGRPWRSYARVTVVIGTYLDLTIIEPNGWIDWNG-VTA--LS
At3g49220      LAASDLQATN----GSTQTYLGRPWKLFRTVYMMYSYIGGHVHTRGWLEWNT-TFA--LD
At3g06830      TGDPAYIPMK----SVNKAYLGRPWKEFSRTIIMKTTIDDVIDPAGWLPWSG-DFA--LK
At2g26440      LASEDLFNS--NKVKSYLGRPWREFSRTVVMESYIDDEFIDGSGWSKWNG-GEA--LD
At1g53840      SANGNVI-----APTYLGRPWKEFSSTTVIMETVIGAVVRPSEGWSVWV-GVDP-FA
At4g33220      SADADLVPLY----NTTRTYLGRPWKLYSRVFIIRNNSDVVRPEGWLEWNA-DFA--LD
At3g60730      RAPEPEAVK----GRFKSYLGRPWKYSRTVFLKTDIDELIDPRGWREWSG-SYA--LS
At3g43270      AADTDLNLLN----NTTATYLGPRWKLYSRTVFMQNYMSDAINPVGWLEWNG-NFA--LD
At3g05620      LAT-----QPTYLGRPWKLYSRVYMNITYMSQLVQPPRGWLEWFG-NFA--LD
At3g05610      AGEFDYLAVK----ETSKAYLGRPWKEYSRTIIMNTFIPDFVQPPQGWQFWLG-DFG--LK
At2g45220      TAASDLRPVL----GSTKTYLGRPWQYSRTVFMKTSLDSLIDPRGWLEWNG-NFA--LK
At1g11580      TASSDLAPVK----GSVKTYLGRPWKLYSRVIMQSFIDNHIDPAGWFPWDG-EFA--LS
At3g14310      GATSDLQSVK----GSFPTYLGRPWKEYSQTVMQSAISDVIIRPEGWSEWTG-TFA--LN
At5g27870      VGEFDYLAVK----EQSKTYLGRPWKEYSRTIIMNTFIPDFVQPPQGWQFWLG-EFG--LN
At3g59010      TGS-----TKTYLGRPWQYSRTVVMQSFIDGSIHPSGWSFWNS-NFA--LK
At2g43050      TAE-----SMTYLGPRWKEYSRTVVMQSFIDGSIHPSGWSFWNS-GFG--LK
At1g53830      GGTSDDLAVK----GTFPTYLGRPWKEYSRTVIMQSDISDVIIRPEGWHEWSG-SFA--LD
At4g02330      KPADDLVSSN----YTVKTYLGRPWKEYSRTVFMQSYIDEVVEPVGWLEWNG-DFA--LS
At2g47550      RPADDLATS----YTVKTYLGRPWKEYSRTVVMQTYIDGPLEPSEGWNWNG-DFA--LS
At1g02810      KPADDLVSSN----YTVKTYLGRPWKEYSRTVFMQSYIDGFEVPGWREWNG-DFA--LS
Antibody      STNLRPWKEYSRTV
                ::*****  . . .
    
```

**B**

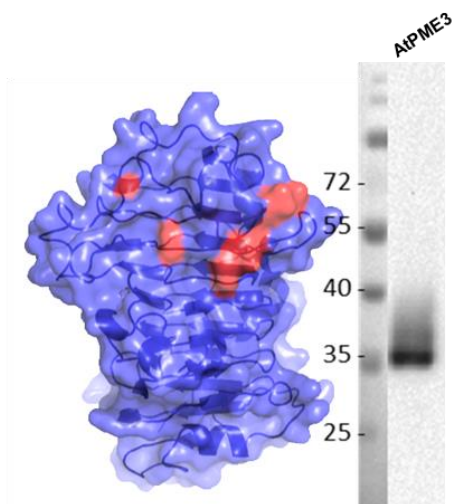

1154

1155

1156 **Supplemental Figure 4: (A)** Sequence alignment of 45 Arabidopsis PME isoforms showing  
 1157 the conservation of the epitope used for production of the generic anti-PME antibody. **(B)**  
 1158 Immunodetection of AtPME3 using the generic anti-PME antibody



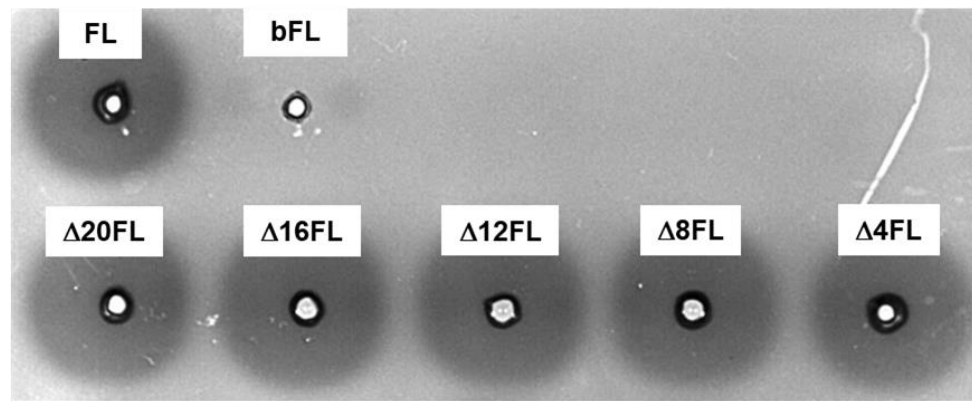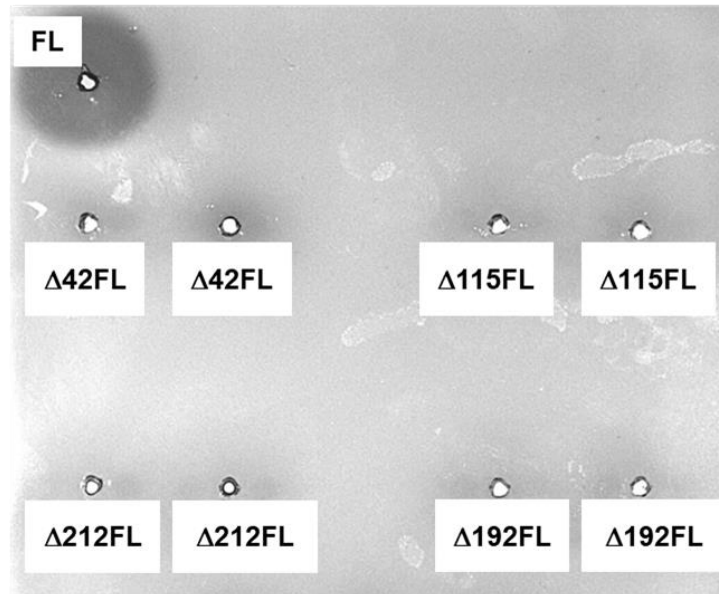

| Deletion | FL | Δ4FL | Δ8FL | Δ12FL | Δ16FL | Δ20FL | Δ42FL | Δ115FL | Δ192FL | Δ212FL |
|----------|----|------|------|-------|-------|-------|-------|--------|--------|--------|
| Activity | +  | +    | +    | +     | +     | +     | -     | -      | -      | -      |

1159

1160 **Supplemental Figure 5:** Effects of deletion of the N-terminus sequence of AtPME2 on the  
 1161 production of an active enzyme in *Pichia*. F: Full length AtPME2, FLb: heat-denatured  
 1162 AtPME2, Δ4FL to Δ212FL: Deletion of 4 to 212 amino acids of the PRO part. PME activity  
 1163 was assessed on concentrated supernatants using gel diffusion assay.  
 1164



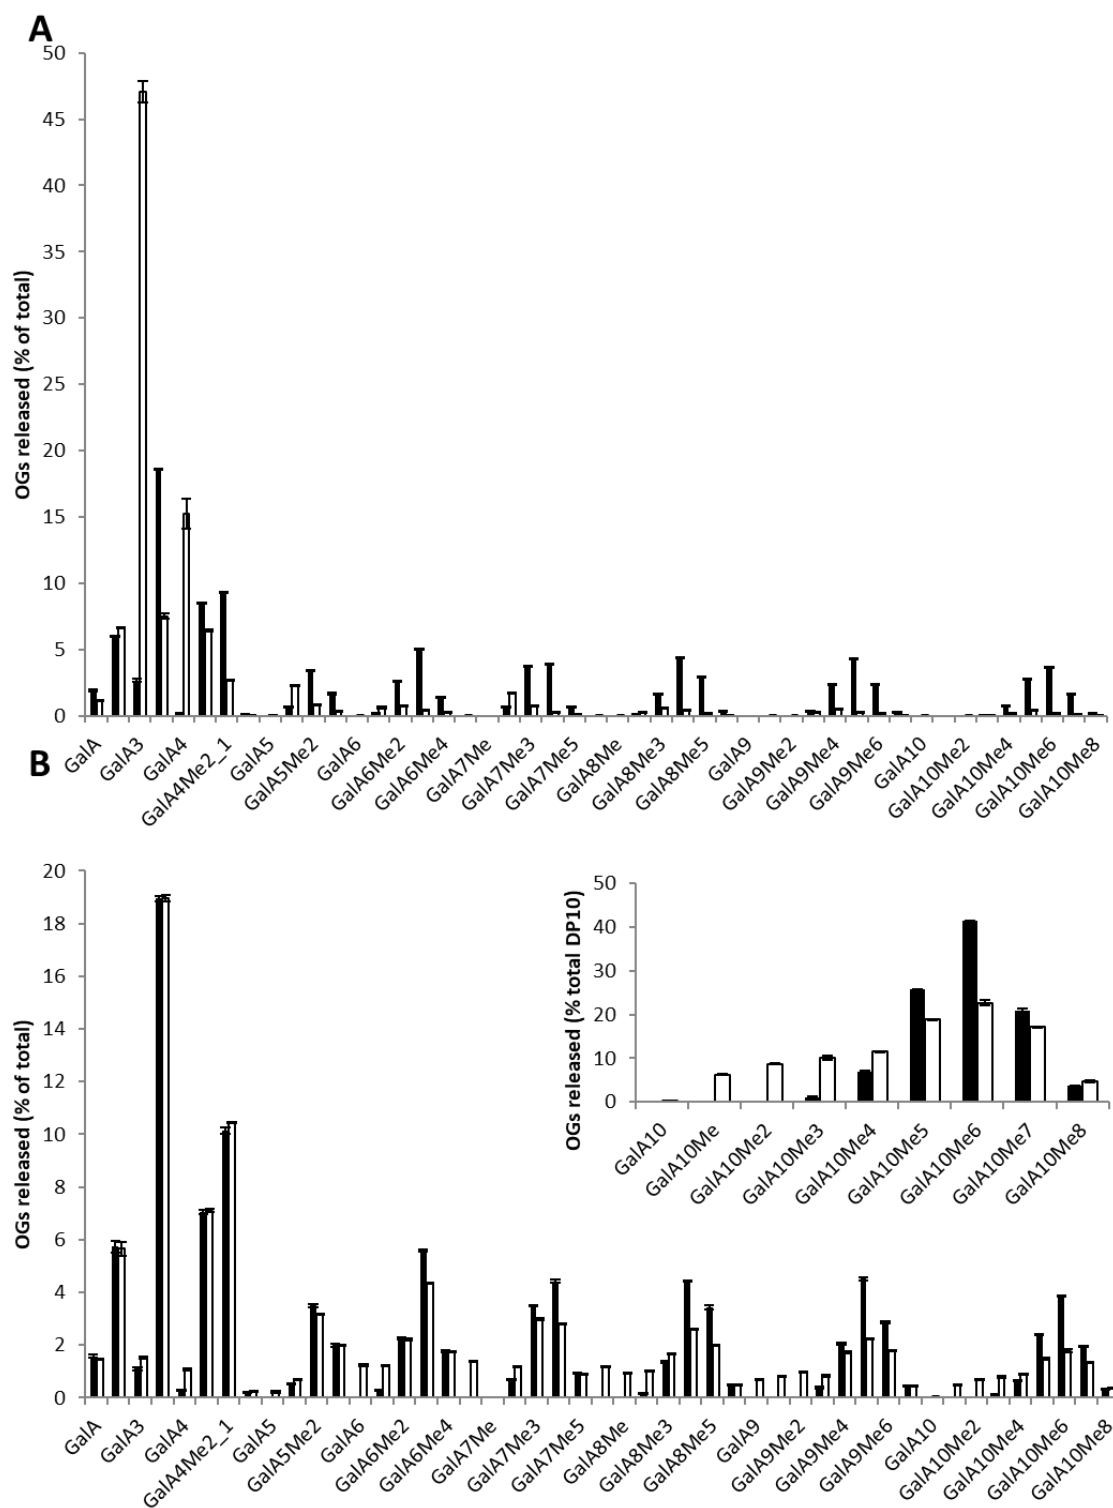

1165

1166 **Supplemental Figure 6:** Determination of the processivity of CsPME at (A) pH 8 and (B) pH  
1167 5 using LC-MS/MS. Non-digested samples (black bars); CsPME digestion (white bars). Data  
1168 represent the mean  $\pm$  SE of three replicates.  
1169

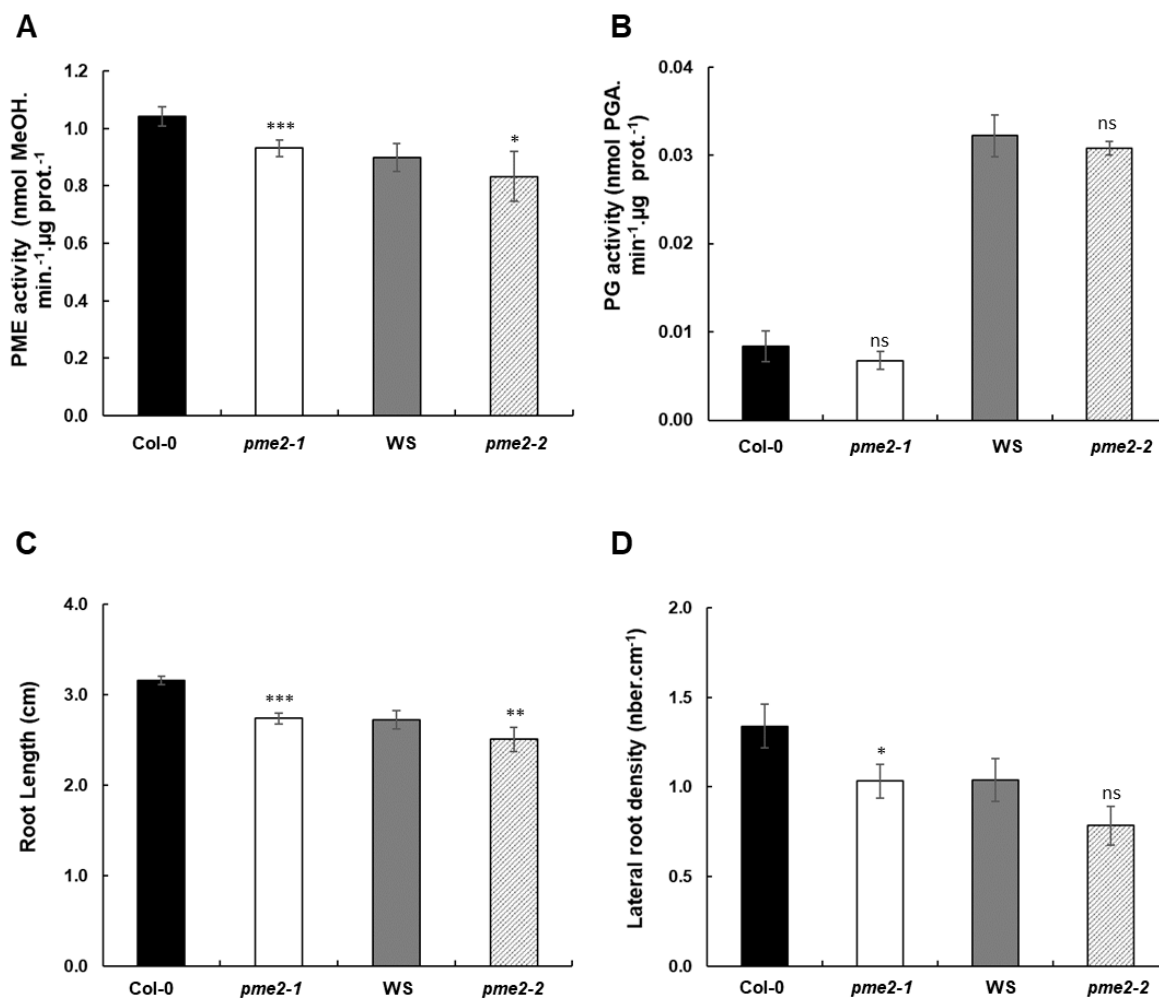

1170

1171 **Supplemental Figure 7:** *pme2* mutation affect root development. (A) Total PME activity of  
1172 cell wall-enriched protein extracts from 7-day-old roots of wild type Col-0/WS and *pme2-*  
1173 *1/pme2-2* mutants. Data represent the means of PME activity in nmol of methanol.min<sup>-1</sup>/μg of  
1174 protein<sup>-1</sup> ± SE of three independent protein extractions and three technical replicates (n=9). (B)  
1175 Total PG activity of cell wall-enriched protein extracts from 4 day-old dark-grown hypocotyls  
1176 of wild type Col-0/WS and *pme2-1/pme2-2* mutants. Data represent the means of PG activity  
1177 in nmol of PGA.min<sup>-1</sup>/μg of protein<sup>-1</sup> ± SE of three independent protein extractions and three  
1178 technical replicates (n=9). (C) Root length measured on 7-day-old roots of wild-type and  
1179 *pme2-1* and *pme2-2* mutant lines (n>90). (D) Lateral root density (number of emerged lateral  
1180 root.cm<sup>-1</sup>) of wild-type and *pme2-1* and *pme2-2* mutant lines (n>90). Statistical analyses were  
1181 realized using Mann-Whitney test: \* *P*<0.05.

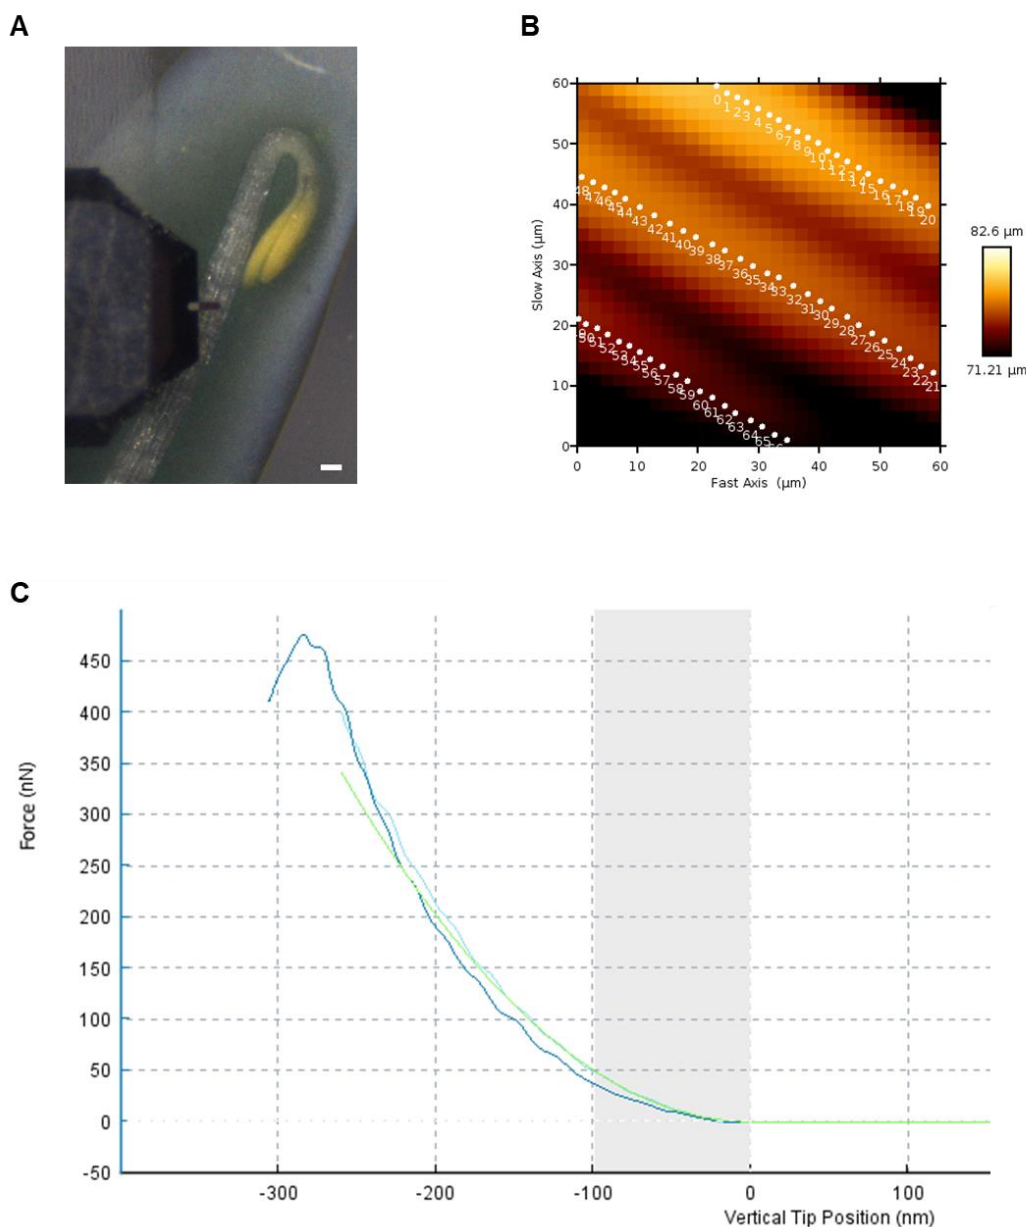

1182

1183 **Supplemental Figure 8:** AFM analysis of 3-day-old hypocotyls. **(A)** Top view of a wild-type  
1184 hypocotyl under the atomic force microscope; the cantilever (rectangular with a triangular  
1185 end) is located over the hypocotyl at about 1mm from the hook. Scale bar 100  $\mu\text{m}$ . **(B)**  
1186 Topographic image of a 60  $\mu\text{m}$  x 60  $\mu\text{m}$  region of the hypocotyl (height scale on right), with  
1187 three cells partially visible. The white dots show points where force-depth curves were  
1188 obtained in order to characterise cell wall stiffness. **(C)** Typical force-depth curve with  
1189 approach in light blue, retract in dark blue. The green curve is a fit of the approach to the  
1190 Sneddon model, which yields the apparent Young's modulus.  
1191

1192

1193 **Supplemental Table**

**A**

|                    |                                                 | Col          |             | <i>pme2.1</i> |             | WS           |             | <i>pme2.2</i> |             |
|--------------------|-------------------------------------------------|--------------|-------------|---------------|-------------|--------------|-------------|---------------|-------------|
|                    |                                                 | % coverage   | Nb peptides | % coverage    | Nb peptides | % coverage   | Nb peptides | % coverage    | Nb peptides |
| AT1G01900.1        | Subtilase family protein                        | 18.6         | 11          | 14.08         | 8           | 10.85        | 5           | 13.05         | 7           |
| AT1G20160.2        | Subtilisin-like serine endopeptidase protein    | 12.88        | 8           | 15.34         | 9           | 14.25        | 9           | 14.25         | 9           |
| <b>AT1G53830.1</b> | <b>Pectin methylesterase 2</b>                  | <b>19.08</b> | <b>5</b>    |               |             | <b>18.57</b> | <b>5</b>    |               |             |
| AT2G05920.1        | Subtilase family protein                        | 26.92        | 16          | 31.03         | 17          | 32.36        | 17          | 31.03         | 16          |
| AT2G43050.1        | Plant invertase/pectin methylesterase inhibitor | 25.68        | 10          | 27.22         | 11          | 22.78        | 9           | 18.73         | 7           |
| AT2G46930.1        | Pectinacylesterase family protein               | 17.55        | 5           | 29.09         | 8           | 31.49        | 9           | 31.01         | 8           |
| AT3G05910.1        | Pectinacylesterase family protein               | 27.95        | 7           | 5.54          | 2           | 35.42        | 9           | 26.75         | 7           |
| AT3G06770.2        | Pectin lyase-like superfamily protein           | 15.02        | 5           | 8.22          | 2           | 10.34        | 3           | 12.47         | 4           |
| AT3G07010.1        | Pectin lyase-like superfamily protein           | 10.82        | 4           | 10.1          | 3           |              |             |               |             |
| AT3G09410.3        | Pectinacylesterase family protein               |              |             |               |             | 6.06         | 2           | 8.67          | 3           |
| AT3G14067.1        | Subtilase family protein                        | 24.45        | 12          | 24.45         | 12          | 26           | 12          | 22.91         | 11          |
| AT3G14310.1        | Pectin methylesterase 3                         | 27.87        | 11          | 26.52         | 13          | 28.04        | 11          | 28.04         | 14          |
| AT3G16850.1        | Pectin lyase-like superfamily protein           | 28.57        | 7           | 32.75         | 9           | 28.57        | 8           | 30.33         | 8           |
| AT3G43270.1        | Plant invertase/pectin methylesterase inhibitor | 15.37        | 5           | 13.47         | 4           | 13.47        | 4           | 11.2          | 3           |
| AT3G49220.1        | Plant invertase/pectin methylesterase inhibitor | 9.2          | 5           | 10.37         | 6           | 12.04        | 7           | 10.87         | 7           |
| AT3G55140.2        | Pectin lyase-like superfamily protein           | 7.82         | 2           | 11.4          | 3           | 7.82         | 2           | 10.75         | 3           |
| AT3G57790.1        | Pectin lyase-like superfamily protein           | 4.69         | 2           | 10            | 5           | 12.65        | 6           | 10            | 5           |
| AT3G59010.1        | Pectin methylesterase 61                        |              |             |               |             | 15.88        | 4           | 13.04         | 4           |
| AT3G61490.1        | Pectin lyase-like superfamily protein           |              |             |               |             |              |             | 11.97         | 3           |
| AT4G19410.1        | Pectinacylesterase family protein               | 51.41        | 12          | 53.2          | 9           | 58.31        | 13          | 59.85         | 13          |
| AT4G23820.1        | Pectin lyase-like superfamily protein           | 32.66        | 10          | 10.14         | 3           | 18.24        | 5           | 9.23          | 2           |
| AT4G25260.1        | Plant invertase/pectin methylesterase inhibitor | 26.87        | 4           | 40.3          | 6           | 32.34        | 6           | 23.38         | 4           |
| AT4G33220.1        | Pectin methylesterase 44                        | 19.43        | 6           | 19.24         | 7           | 19.05        | 5           | 16.76         | 5           |
| AT5G20740.1        | Plant invertase/pectin methylesterase inhibitor |              |             |               |             | 11.71        | 2           | 11.71         | 2           |
| AT5G45280.2        | Pectinacylesterase family protein               | 71.1         | 16          | 66.24         | 13          | 44.5         | 10          | 44.5          | 10          |
| AT5G46960.1        | Plant invertase/pectin methylesterase inhibitor |              |             |               |             | 14.94        | 2           | 14.94         | 2           |
| AT5G51750.1        | Subtilase 1.3                                   | 10.13        | 5           |               |             | 10.26        | 5           | 8.21          | 4           |
| AT5G59090.2        | Subtilase 4.12                                  | 23.94        | 14          | 25.31         | 15          | 12.45        | 7           | 14.09         | 8           |
| AT5G62350.1        | Plant invertase/pectin methylesterase inhibitor |              |             |               |             | 11.39        | 2           |               |             |
| AT5G67360.1        | Subtilase family protein                        | 24.7         | 15          | 23.65         | 14          | 41.61        | 20          | 23.65         | 14          |

**B**

|                    |                                                 | Col          |             | WS           |             |
|--------------------|-------------------------------------------------|--------------|-------------|--------------|-------------|
|                    |                                                 | % coverage   | Nb peptides | % coverage   | Nb peptides |
| AT1G30600.1        | Subtilase family protein                        |              |             | 8.65         | 4           |
| AT1G32940.1        | Subtilase family protein                        | 20.8         | 14          |              |             |
| <b>AT1G53830.1</b> | <b>Pectin methylesterase 2</b>                  | <b>18.91</b> | <b>5</b>    | <b>16.87</b> | <b>4</b>    |
| AT2G04160.1        | Subtilisin-like serine endopeptidase            | 15.16        | 9           | 18.39        | 11          |
| AT2G05920.1        | Subtilase family protein                        | 62.2         | 29          | 62.2         | 30          |
| AT2G45220.1        | Plant invertase/pectin methylesterase inhibitor | 30.53        | 13          | 31.12        | 13          |
| AT3G14067.1        | Subtilase family protein                        | 38.87        | 17          | 38.35        | 17          |
| AT3G14310.1        | Pectin methylesterase 3                         | 23.99        | 8           | 19.93        | 7           |
| AT3G16850.1        | Pectin lyase-like superfamily protein           | 18.46        | 5           | 17.58        | 5           |
| AT3G43270.1        | Plant invertase/pectin methylesterase inhibitor |              |             | 11.2         | 3           |
| AT3G57790.1        | Pectin lyase-like superfamily protein           |              |             | 14.69        | 7           |
| AT4G19410.1        | Pectinacylesterase family protein               | 63.94        | 14          | 47.39        | 14          |
| AT4G20430.2        | Subtilase family protein                        | 4.21         | 2           | 4.21         | 2           |
| AT4G21650.1        | Subtilase family protein                        |              |             | 11.1         | 6           |
| AT4G23500.1        | Pectin lyase-like superfamily protein           | 4.65         | 2           | 12.53        | 4           |
| AT4G25260.1        | Plant invertase/pectin methylesterase inhibitor |              |             | 11.94        | 2           |
| AT4G33220.1        | pectin methylesterase 44                        |              |             | 13.9         | 3           |
| AT4G34980.1        | Subtilase family protein                        | 18.85        | 11          | 23.04        | 13          |
| AT5G09760.1        | Plant invertase/pectin methylesterase inhibitor | 13.43        | 5           | 11.8         | 5           |
| AT5G44530.1        | Subtilase family protein                        | 13.81        | 7           | 9.05         | 4           |
| AT5G45280.2        | Pectinacylesterase family protein               | 47.83        | 10          | 43.22        | 10          |
| AT5G59090.2        | Subtilase 4.12                                  | 30.23        | 16          | 35.15        | 21          |
| AT5G62350.1        | Plant invertase/pectin methylesterase inhibitor |              |             | 36.63        | 4           |
| AT5G67360.1        | Subtilase family protein                        | 32.76        | 17          | 42.8         | 21          |

1194

1195 **Table I:** Identification of homogalacturonan remodeling enzymes and regulators in cell wall-  
 1196 enriched protein extracts of (A) 4 day-old dark-grown hypocotyls of wild type Col-0/WS and  
 1197 *pme2* mutants and (B) Col-0/WS roots.

1198

1199

1200

## Parsed Citations

Andres-Robin, A., Reymond, M.C., Dupire, A, et al. (2018) Evidence for the regulation of gynoecium morphogenesis by ETTIN via cell wall dynamics. *Plant Physiol.*, 178, 1222–1232.

Google Scholar: [Author Only](#) [Title Only](#) [Author and Title](#)

Bader, O., Krauke, Y. and Hube, B. (2008) Processing of predicted substrates of fungal Kex2 proteinases from *Candida albicans*, *C. glabrata*, *Saccharomyces cerevisiae* and *Pichia pastoris*. *BMC Microbiol.*, 8, 116. Available at:

<http://bmcmicrobiol.biomedcentral.com/articles/10.1186/1471-2180-8-116> [Accessed June 11, 2020].

Google Scholar: [Author Only](#) [Title Only](#) [Author and Title](#)

Baker, N.A., Sept, D., Joseph, S., Holst, M.J. and McCammon, J.A. (2001) Electrostatics of nanosystems: Application to microtubules and the ribosome. *Proc. Natl. Acad. Sci. U. S. A.*, 98, 10037–10041. Available at: <https://pubmed.ncbi.nlm.nih.gov/11517324/> [Accessed November 24, 2020].

Google Scholar: [Author Only](#) [Title Only](#) [Author and Title](#)

Blomberg, N., Gabdoulline, R.R., Nilges, M. and Wade, R.C. (1999) Classification of protein sequences by homology modeling and quantitative analysis of electrostatic similarity. *Proteins Struct. Funct. Genet.*, 37, 379–387. Available at:

<https://onlinelibrary.wiley.com/doi/full/10.1002/%28SICI%291097-0134%2819991115%2937%3A3%3C379%3A%3AAID-PROT6%3E3.0.CO%3B2-K> [Accessed November 17, 2020].

Google Scholar: [Author Only](#) [Title Only](#) [Author and Title](#)

Bosch, M. (2005) Pectin Methylsterases and Pectin Dynamics in Pollen Tubes. *Plant Cell Online*, 17, 3219–3226. Available at: <http://www.plantcell.org/cgi/doi/10.1105/tpc.105.037473>.

Google Scholar: [Author Only](#) [Title Only](#) [Author and Title](#)

Bosch, M. and Hepler, P.K. (2005) Pectin methylsterases and pectin dynamics in pollen tubes. *Plant Cell*, 17, 3219–3226.

Google Scholar: [Author Only](#) [Title Only](#) [Author and Title](#)

Brady, S.M., Orlando, D.A., Lee, J.Y., Wang, J.Y., Koch, J., Dinneny, J.R., Mace, D., Ohler, U. and Benfey, P.N. (2007) A high-resolution root spatiotemporal map reveals dominant expression patterns. *Science* (80-. ), 318, 801–806.

Google Scholar: [Author Only](#) [Title Only](#) [Author and Title](#)

Braybrook, S.A and Peaucelle, A (2013) Mechano-chemical aspects of organ formation in *Arabidopsis thaliana*: the relationship between auxin and pectin. *PLoS One*, 8, e57813–e57813. Available at: <https://pubmed.ncbi.nlm.nih.gov/23554870>.

Google Scholar: [Author Only](#) [Title Only](#) [Author and Title](#)

Cameron, R.G., Luzio, G.A., Goodner, K. and Williams, M.A.K. (2008) Demethylation of a model homogalacturonan with a salt-independent pectin methylsterase from citrus: I. Effect of pH on demethylated block size, block number and enzyme mode of action. *Carbohydr. Polym.*, 71, 287–299. Available at: <http://www.sciencedirect.com/science/article/pii/S0144861707003530>.

Google Scholar: [Author Only](#) [Title Only](#) [Author and Title](#)

Catoire, L., Pierron, M., Morvan, C., Hervé Du Penhoat, C. and Goldberg, R.E. (1998) Investigation of the Action Patterns of Pectinmethylsterase Isoforms through Kinetic Analyses and NMR Spectroscopy IMPLICATIONS IN CELL WALL EXPANSION\*, Available at: <http://www.jbc.org/> [Accessed January 6, 2020].

Cheong, M.S., Lee, D.Y., Seo, K.H., Choi, G.H., Song, Y.H., Park, K.H. and Kim, J.H. (2019) Phenylephrine, a small molecule, inhibits pectin methylsterases. *Biochem Biophys. Res. Commun.*, 508, 320–325.

Google Scholar: [Author Only](#) [Title Only](#) [Author and Title](#)

Daher, F.B., Chen, Y., Bozorg, B., Clough, J., Jönsson, H. and Braybrook, S.A (2018) Anisotropic growth is achieved through the additive mechanical effect of material anisotropy and elastic asymmetry. *Elife*, 7. Available at: <https://elifesciences.org/articles/38161> [Accessed February 4, 2019].

Google Scholar: [Author Only](#) [Title Only](#) [Author and Title](#)

Dedeurwaerder, S., Menu-Bouaouiche, L., Mareck, A., Lerouge, P. and Guerineau, F. (2009) Activity of an atypical *Arabidopsis thaliana* pectin methylsterase. *Planta*, 229, 311–321.

Google Scholar: [Author Only](#) [Title Only](#) [Author and Title](#)

Denès, J.M., Baron, A., Renard, C.M.G.C., Péan, C. and Drilleau, J.F. (2000) Different action patterns for apple pectin methylsterase at pH 7.0 and 4.5. *Carbohydr. Res.*, 327, 385–93. Available at: <http://www.ncbi.nlm.nih.gov/pubmed/10990023> [Accessed January 6, 2020].

Google Scholar: [Author Only](#) [Title Only](#) [Author and Title](#)

Dixit, S., Upadhyay, S.K., Singh, H., Pandey, B., Chandrashekar, K. and Verma, P.C. (2013) Pectin methylsterase of *Datura* species, purification, and characterization from *Datura stramonium* and its application. *Plant Signal. Behav.*, 8.

Google Scholar: [Author Only](#) [Title Only](#) [Author and Title](#)

Dolinsky, T.J., Nielsen, J.E., McCammon, J.A and Baker, N.A (2004) PDB2PQR: An automated pipeline for the setup of Poisson-Boltzmann electrostatics calculations. *Nucleic Acids Res.*, 32. Available at: <https://pubmed.ncbi.nlm.nih.gov/15215472/> [Accessed November 24, 2020].

Google Scholar: [Author Only](#) [Title Only](#) [Author and Title](#)

Dorokhov, Y.L., Skurat, E. V., Frolova, O.Y., et al. (2006) Role of the leader sequence in tobacco pectin methylesterase secretion. *FEBS Lett.*, 580, 3329–3334. Available at: <http://doi.wiley.com/10.1016/j.febslet.2006.04.090> [Accessed June 11, 2020].

Google Scholar: [Author Only Title Only Author and Title](#)

Downie, B., Dirk, L.M.A., Hadfield, K.A., Wilkins, T.A., Bennett, A.B. and Bradford, K.J. (1998) A gel diffusion assay for quantification of pectin methylesterase activity. *Anal. Biochem.*, 264, 149–157.

Google Scholar: [Author Only Title Only Author and Title](#)

Duvetter, T., Fraeye, I., Sila, D.N., Verlent, I., Smout, C., Hendrickx, M. and Loey, A. Van (2006) Mode of De-esterification of Alkaline and Acidic Pectin Methyl Esterases at Different pH Conditions. *J. Agric. Food Chem.*, 54, 7825–7831. Available at: <https://doi.org/10.1021/jf060013h>.

Google Scholar: [Author Only Title Only Author and Title](#)

Fendrych, M., Leung, J. and Friml, J. (2016) TIR1/AFB-Aux/IAA auxin perception mediates rapid cell wall acidification and growth of *Arabidopsis hypocotyls*. *Elife*, 5, e19048. Available at: <https://pubmed.ncbi.nlm.nih.gov/27627746>.

Google Scholar: [Author Only Title Only Author and Title](#)

Francoz, E., Ranocha, P., Ru, A. Le, Martinez, Y., Fourquaux, I., Jauneau, A., Dunand, C. and Burlat, V. (2019) Pectin Demethylesterification Generates Platforms that Anchor Peroxidases to Remodel Plant Cell Wall Domains. *Dev. Cell*, 48, 261-276.e8.

Google Scholar: [Author Only Title Only Author and Title](#)

Fries, M., Ihrig, J., Brocklehurst, K., Shevchik, V.E. and Pickersgill, R.W. (2007) Molecular basis of the activity of the phytopathogen pectin methylesterase. *EMBO J.*, 26, 3879–3887. Available at: <http://emboj.embopress.org/cgi/doi/10.1038/sj.emboj.7601816> [Accessed June 5, 2020].

Google Scholar: [Author Only Title Only Author and Title](#)

Goldberg, R., Morvan, C., Jauneau, A. and Jarvis, M.C. (1996) Methyl-esterification, de-esterification and gelation of pectins in the primary cell wall. *Prog. Biotechnol.*, 14, 151–172.

Google Scholar: [Author Only Title Only Author and Title](#)

Hervé, V., Duruflé, H., San Clemente, H., Albenne, C., Balliau, T., Zivy, M., Dunand, C. and Jamet, E. (2016) An enlarged cell wall proteome of *Arabidopsis thaliana* rosettes. *Proteomics*, 16, 3183–3187. Available at: <http://doi.wiley.com/10.1002/pmic.201600290> [Accessed June 11, 2020].

Google Scholar: [Author Only Title Only Author and Title](#)

Hewezi, T., Howe, P., Maier, T.R., Hussey, R.S., Mitchum, M.G., Davis, E.L. and Baum, T.J. (2008) Cellulose binding protein from the parasitic nematode *Heterodera schachtii* interacts with *Arabidopsis* pectin methylesterase: cooperative cell wall modification during parasitism. *Plant Cell*, 20, 3080–93. Available at: <http://www.ncbi.nlm.nih.gov/pubmed/19001564> [Accessed February 5, 2019].

Google Scholar: [Author Only Title Only Author and Title](#)

Hocq, L., Guinand, S., Habrylo, O., et al. (2020) The exogenous application of AtPGLR, an endo-polygalacturonase, triggers pollen tube burst and repair. *Plant J.*, n/a. Available at: <https://doi.org/10.1111/tpj.14753>.

Google Scholar: [Author Only Title Only Author and Title](#)

Hocq, L., Pelloux, J. and Lefebvre, V. (2017) Connecting Homogalacturonan-Type Pectin Remodeling to Acid Growth. *Trends Plant Sci.*, 22, 20–29. Available at: <http://dx.doi.org/10.1016/j.tplants.2016.10.009>.

Google Scholar: [Author Only Title Only Author and Title](#)

Hocq, L., Sénéchal, F., Lefebvre, V., et al. (2017) Combined Experimental and Computational Approaches Reveal Distinct pH Dependence of Pectin Methylesterase Inhibitors. *Plant Physiol.*, 173, 1075–1093. Available at: <http://www.plantphysiol.org/lookup/doi/10.1104/pp.16.01790>.

Google Scholar: [Author Only Title Only Author and Title](#)

Hruz, T., Laule, O., Szabo, G., Wessendorp, F., Bleuler, S., Oertle, L., Widmayer, P., Gruissem, W. and Zimmermann, P. (2008) Genevestigator V3: A Reference Expression Database for the Meta-Analysis of Transcriptomes Y. Van de Peer, ed. *Adv. Bioinformatics*, 2008, 420747. Available at: <https://doi.org/10.1155/2008/420747>.

Google Scholar: [Author Only Title Only Author and Title](#)

Johansson, K., El-Ahmad, M., Friemann, R., Jörnvall, H., Marković, O. and Eklund, H. (2002) Crystal structure of plant pectin methylesterase. *FEBS Lett.*, 514, 243–249.

Google Scholar: [Author Only Title Only Author and Title](#)

Jolie, R.P., Duvetter, T., Loey, A.M. Van and Hendrickx, M.E. (2010) Pectin methylesterase and its proteinaceous inhibitor: A review. *Carbohydr. Res.*, 345, 2583–2595.

Google Scholar: [Author Only Title Only Author and Title](#)

Kent, L.M., Loo, T.S., Melton, L.D., Mercadante, D., Williams, M.A.K. and Jameson, G.B. (2016) Structure and properties of a non-processive, salt-requiring, and acidophilic pectin methylesterase from *aspergillus Niger* provide insights into the key determinants of processivity control. *J. Biol. Chem.*, 291, 1289–1306.

Google Scholar: [Author Only Title Only Author and Title](#)

Kumpf, R.P., Shi, C.-L., LARRIERU, A., Sto, I.M., Butenko, M.A., Peret, B., Riiser, E.S., Bennett, M.J. and Aalen, R.B. (2013) Floral organ abscission peptide IDA and its HAE/HSL2 receptors control cell separation during lateral root emergence. *Proc. Natl. Acad. Sci.*, 110,



5235–5240. Available at: <http://www.pnas.org/cgi/doi/10.1073/pnas.1210835110>.

Google Scholar: [Author Only](#) [Title Only](#) [Author and Title](#)

Leroux, C., Bouton, S., Kiefer-Meyer, M.-C., et al. (2015) PECTIN METHYLESTERASE48 Is Involved in Arabidopsis Pollen Grain Germination. *Plant Physiol.*, 167, 367–380. Available at: <http://www.plantphysiol.org/lookup/doi/10.1104/pp.114.250928>.

Google Scholar: [Author Only](#) [Title Only](#) [Author and Title](#)

Lin, T.-P., Liu, C.-C., Chen, S.-W. and Wang, W.-Y. (1989) Purification and Characterization of Pectinmethylesterase from *Ficus awkeotsang* Makino Achenes. *Plant Physiol.*, 91, 1445–1453.

Google Scholar: [Author Only](#) [Title Only](#) [Author and Title](#)

Malamy, J.E. and Benfey, P.N. (1997) . , 44, 33–44.

Google Scholar: [Author Only](#) [Title Only](#) [Author and Title](#)

Markovič, O. and Janeček, Š. (2004) Pectin methylesterases: Sequence-structural features and phylogenetic relationships. *Carbohydr. Res.*, 339, 2281–2295.

Google Scholar: [Author Only](#) [Title Only](#) [Author and Title](#)

Markovič, O. and Kohn, R. (1984) Mode of pectin deesterification by *Trichoderma reesei* pectinesterase. *Experientia*, 40, 842–843.

Google Scholar: [Author Only](#) [Title Only](#) [Author and Title](#)

Mercadante, D., Melton, L.D., Jameson, G.B. and Williams, M.A.K. (2014) Processive pectin methylesterases: the role of electrostatic potential, breathing motions and bond cleavage in the rectification of Brownian motions. *PLoS One*, 9, e87581. Available at: <http://www.ncbi.nlm.nih.gov/pubmed/24503943> [Accessed June 5, 2020].

Google Scholar: [Author Only](#) [Title Only](#) [Author and Title](#)

Mercadante, D., Melton, L.D., Jameson, G.B., Williams, M.A.K. and Simone, A. De (2013) Substrate dynamics in enzyme action: Rotations of monosaccharide subunits in the binding groove are essential for pectin methylesterase processivity. *Biophys. J.*, 104, 1731–1739. Available at: <http://dx.doi.org/10.1016/j.bpj.2013.02.049>.

Google Scholar: [Author Only](#) [Title Only](#) [Author and Title](#)

Micheli, F. (2001) Pectin methylesterases: Cell wall enzymes with important roles in plant physiology. *Trends Plant Sci.*, 6, 414–419.

Google Scholar: [Author Only](#) [Title Only](#) [Author and Title](#)

Milani, P., Gholamirad, M., Traas, J., Arnéodo, A., Boudaoud, A., Argoul, F. and Hamant, O. (2011) In vivo analysis of local wall stiffness at the shoot apical meristem in *Arabidopsis* using atomic force microscopy. *Plant J.*, 67, 1116–1123.

Google Scholar: [Author Only](#) [Title Only](#) [Author and Title](#)

Nguyen-Kim, H., San Clemente, H., Balliau, T., Zvy, M., Dunand, C., Albenne, C. and Jamet, E. (2016) *Arabidopsis thaliana* root cell wall proteomics: Increasing the proteome coverage using a combinatorial peptide ligand library and description of unexpected Hyp in peroxidase amino acid sequences. *Proteomics*, 16, 491–503. Available at: <http://doi.wiley.com/10.1002/pmic.201500129> [Accessed May 22, 2019].

Google Scholar: [Author Only](#) [Title Only](#) [Author and Title](#)

Peaucelle, A., Braybrook, S.A., Le Guillou, L., Bron, E., Kuhlemeier, C. and Höfte, H. (2011) Pectin-Induced Changes in Cell Wall Mechanics Underlie Organ Initiation in *Arabidopsis*. *Curr. Biol.*, 21, 1720–1726. Available at: <http://www.sciencedirect.com/science/article/pii/S0960982211009638>.

Google Scholar: [Author Only](#) [Title Only](#) [Author and Title](#)

Peaucelle, A., Louvet, R., Johansen, J.N., et al. (2011) The transcription factor BELLRINGER modulates phyllotaxis by regulating the expression of a pectin methylesterase in *Arabidopsis*. *Development*, 138, 4733–4741.

Google Scholar: [Author Only](#) [Title Only](#) [Author and Title](#)

Peaucelle, A., Louvet, R., Johansen, J.N., Höfte, H., Laufs, P., Pelloux, J. and Mouille, G. (2008) *Arabidopsis* phyllotaxis is controlled by the methyl-esterification status of cell-wall pectins. *Curr. Biol.*, 18, 1943–8. Available at: <http://www.ncbi.nlm.nih.gov/pubmed/19097903>.

Google Scholar: [Author Only](#) [Title Only](#) [Author and Title](#)

Peaucelle, A., Wightman, R. and Höfte, H. (2015) The Control of Growth Symmetry Breaking in the *Arabidopsis* Hypocotyl. *Curr. Biol.*, 25, 1746–1752.

Google Scholar: [Author Only](#) [Title Only](#) [Author and Title](#)

Pelletier, S., Orden, J. Van, Wolf, S., et al. (2010) A role for pectin de-methylesterification in a developmentally regulated growth acceleration in dark-grown *Arabidopsis* hypocotyls. *New Phytol.*, 188, 726–739.

Google Scholar: [Author Only](#) [Title Only](#) [Author and Title](#)

Pelloux, J., Rustérucci, C. and Mellerowicz, E.J. (2007) New insights into pectin methylesterase structure and function. *Trends Plant Sci.*, 12, 267–277.

Google Scholar: [Author Only](#) [Title Only](#) [Author and Title](#)

Peng, C.C., Hsiao, E.S.L., Ding, J.L.C. and Tzen, J.T.C. (2005) Functional expression in *Pichia pastoris* of an acidic pectin methylesterase from jelly fig (*Ficus awkeotsang*). *J. Agric. Food Chem.*, 53, 5612–5616.

Google Scholar: [Author Only](#) [Title Only](#) [Author and Title](#)

Refrégier, G., Pelletier, S., Jaillard, D. and Höfte, H. (2004) Interaction between wall deposition and cell elongation in dark-grown

hypocotyl cells in *Arabidopsis*. *Plant Physiol.*, 135, 959–968.

Google Scholar: [Author Only](#) [Title Only](#) [Author and Title](#)

Ren, C. and Kermode, A.R. (2000) An increase in pectin methyl esterase activity accompanies dormancy breakage and germination of yellow cedar seeds. *Plant Physiol.*, 124, 231–242. Available at: [/pmc/articles/PMC59138/?report=abstract](http://pmc/articles/PMC59138/?report=abstract) [Accessed June 30, 2020].

Google Scholar: [Author Only](#) [Title Only](#) [Author and Title](#)

Ridley, B.L., O'Neill, M.A. and Mohnen, D. (2001) Pectins: Structure, biosynthesis, and oligogalacturonide-related signaling. *Phytochemistry*, 57, 929–967. Available at: <https://pubmed.ncbi.nlm.nih.gov/11423142/> [Accessed November 5, 2020].

Google Scholar: [Author Only](#) [Title Only](#) [Author and Title](#)

Salamin, K., Sriranganadane, D., Léchenne, B. and Jousson, O. (2010) Endogenous Secreted Subtilisin in *Pichia pastoris* GS115 and KM71 Strains 1 2. Available at: <http://aemas.org/> [Accessed June 11, 2020].

Google Scholar: [Author Only](#) [Title Only](#) [Author and Title](#)

San Clemente, H. and Jamet, E. (2015) WallProtDB, a database resource for plant cell wall proteomics. *Plant Methods*, 11, 1–7.

Google Scholar: [Author Only](#) [Title Only](#) [Author and Title](#)

Savary, B.J. (2001) Perfusion chromatography separation of the tomato fruit-specific pectin methylesterase from a semipurified commercial enzyme preparation. *Prep. Biochem. Biotechnol.*, 31, 241–258.

Google Scholar: [Author Only](#) [Title Only](#) [Author and Title](#)

Savary, B.J., Vasu, P., Cameron, R.G., McCollum, T.G. and Nuñez, A. (2013) Structural Characterization of the Thermally Tolerant Pectin Methylesterase Purified from *Citrus sinensis* Fruit and Its Gene Sequence. *J. Agric. Food Chem.*, 61, 12711–12719. Available at: <https://doi.org/10.1021/jf403914u>.

Google Scholar: [Author Only](#) [Title Only](#) [Author and Title](#)

Savary, B.J., Vasu, P., Nunez, A. and Cameron, R.G. (2010) Identification of thermolabile pectin methylesterases from sweet orange fruit by peptide mass fingerprinting. *J. Agric. Food Chem.*, 58, 12462–12468.

Google Scholar: [Author Only](#) [Title Only](#) [Author and Title](#)

Sénéchal, F., Graff, L., Surcouf, O., et al. (2014) *Arabidopsis* PECTIN METHYLESTERASE17 is co-expressed with and processed by SBT3.5, a subtilisin-like serine protease. *Ann. Bot.*, 114, 1161–1175.

Google Scholar: [Author Only](#) [Title Only](#) [Author and Title](#)

Sénéchal, F., L'Enfant, M., Domon, J.M., et al. (2015) Tuning of pectin methylesterification: Pectin methylesterase inhibitor 7 modulates the processive activity of co-expressed pectin methylesterase 3 in a pH-dependent manner. *J. Biol. Chem.*, 290, 23320–23335.

Google Scholar: [Author Only](#) [Title Only](#) [Author and Title](#)

Sénéchal, F., Wattier, C., Rustérucchi, C. and Pelloux, J. (2014) Homogalacturonan-modifying enzymes: Structure, expression, and roles in plants. *J. Exp. Bot.*, 65, 5125–5160.

Google Scholar: [Author Only](#) [Title Only](#) [Author and Title](#)

Søndergaard, C.R., Olsson, M.H.M., Rostkowski, M. and Jensen, J.H. (2011) Improved treatment of ligands and coupling effects in empirical calculation and rationalization of p K a values. *J. Chem. Theory Comput.*, 7, 2284–2295. Available at: <https://pubmed.ncbi.nlm.nih.gov/26606496/> [Accessed November 24, 2020].

Google Scholar: [Author Only](#) [Title Only](#) [Author and Title](#)

Swarup, K., Benková, E., Swarup, R., et al. (2008) The auxin influx carrier LAX3 promotes lateral root emergence. *Nat. Cell Biol.*, 10, 946–954.

Google Scholar: [Author Only](#) [Title Only](#) [Author and Title](#)

Thonar, C., Liners, F. and Cutsem, P. Van (2006) Polymorphism and modulation of cell wall esterase enzyme activities in the chicory root during the growing season. *J. Exp. Bot.*, 57, 81–89. Available at: <http://academic.oup.com/jxb/article/57/1/81/442028/Polymorphism-and-modulation-of-cell-wall-esterase> [Accessed January 6, 2020].

Google Scholar: [Author Only](#) [Title Only](#) [Author and Title](#)

Voxeur, A., Habrylo, O., Guénin, S., et al. (2019) Oligogalacturonide production upon *Arabidopsis thaliana*-*Botrytis cinerea* interaction. *Proc. Natl. Acad. Sci. U. S. A.*, 116, 19743–19752.

Google Scholar: [Author Only](#) [Title Only](#) [Author and Title](#)

Wachsman, G., Zhang, J., Moreno-Risueno, M.A., Anderson, C.T. and Benfey, P.N. (2020) Cell wall remodeling and vesicle trafficking mediate the root clock in *Arabidopsis*. *Science*, 370, 819–823.

Google Scholar: [Author Only](#) [Title Only](#) [Author and Title](#)

Wade, R.C., Gabdouliline, R.R. and Rienzo, F. De (2001) Protein interaction property similarity analysis. *Int. J. Quantum Chem.*, 83, 122–127. Available at: <http://doi.wiley.com/10.1002/qua.1204> [Accessed November 17, 2020].

Google Scholar: [Author Only](#) [Title Only](#) [Author and Title](#)

Wang, J., Cieplak, P. and Kollman, P.A. (2000) How Well Does a Restrained Electrostatic Potential (RESP) Model Perform in Calculating Conformational Energies of Organic and Biological Molecules? Keywords: additive force field; nonadditive force field; restrained electrostatic potential (RESP); torsional angle parameterization, Available at: [www.amber.ucsf.edu/amber/](http://www.amber.ucsf.edu/amber/) [Accessed November 24, 2020].

**Wang, X., Wilson, L. and Cosgrove, D.J. (2020) Pectin methylesterase selectively softens the onion epidermal wall yet reduces acid-induced creep. *J. Exp. Bot.*, 71, 2629–2640. Available at: <https://pubmed.ncbi.nlm.nih.gov/32006044>.**

Google Scholar: [Author Only](#) [Title Only](#) [Author and Title](#)

**Willats, W.G.T., Knox, J.P. and Mikkelsen, J.D. (2006) Pectin: New insights into an old polymer are starting to gel. *Trends Food Sci. Technol.*, 17, 97–104.**

Google Scholar: [Author Only](#) [Title Only](#) [Author and Title](#)

**Willats, W.G.T., Orfila, C., Limberg, G., et al. (2001) Modulation of the degree and pattern of methyl-esterification of pectic homogalacturonan in plant cell walls: Implications for pectin methyl esterase action, matrix properties, and cell adhesion. *J. Biol. Chem.*, 276, 19404–19413.**

Google Scholar: [Author Only](#) [Title Only](#) [Author and Title](#)

**Wolf, S., Rausch, T. and Greiner, S. (2009) The N-terminal pro region mediates retention of unprocessed type-I PME in the Golgi apparatus. *Plant J.*, 58, 361–375.**

Google Scholar: [Author Only](#) [Title Only](#) [Author and Title](#)
