1 **RESEARCH ARTICLE**

2

3 **Running title:** AtPME2 has a pH-dependent processivity

4

5 **Corresponding authors**

6 Jérôme Pelloux and Valérie Lefebvre, UMRT INRAE 1158 BioEcoAgro – BIOPI Biologie des  
7 Plantes et Innovation, SFR Condorcet FR CNRS 3417, Université de Picardie, 33 Rue St Leu, 80039  
8 Amiens, France.

9

10

11

12

13 **Article title**

14 Arabidopsis AtPME2 has a pH-dependent processivity and control cell wall mechanical properties

15

16 **Authors**

17 Ludivine Hocq<sup>1</sup>, Olivier Habrylo<sup>1</sup>, Aline Voxeur<sup>1</sup>, Corinne Pau-Roblot<sup>1</sup>, Josip Safran<sup>1</sup>, Fabien  
18 Sénéchal<sup>1</sup>, Françoise Fournet<sup>1</sup>, Solène Bassard<sup>1</sup>, Virginie Battu<sup>2</sup>, Hervé Demailly<sup>3</sup>, José C. Tovar<sup>4</sup>,  
19 Serge Pilard<sup>5</sup>, Paulo Marcelo<sup>6</sup>, Brett J. Savary<sup>4</sup>, Davide Mercadante<sup>7</sup>, Maria Fransiska Njo<sup>8,9</sup>, Tom  
20 Beeckman<sup>8,9</sup>, Arezki Boudaoud<sup>2</sup>, Jérôme Pelloux<sup>1\*</sup>, Valérie Lefebvre<sup>1\*</sup>

21

22 <sup>1</sup> : UMRT INRAE 1158 BioEcoAgro – BIOPI Biologie des Plantes et Innovation, SFR Condorcet  
23 FR CNRS 3417, Université de Picardie, 33 Rue St Leu, 80039 Amiens, France. <sup>2</sup> : Laboratoire  
24 Reproduction et Développement des Plantes, UMR 5667, ENS de Lyon, BP 7000 69342 Lyon  
25 Cedex 07 France. <sup>3</sup> : CRRBM, Université de Picardie, 33 Rue St Leu, 80039 Amiens, France. <sup>4</sup> :  
26 Arkansas Biosciences Institute, Arkansas State University, Jonesboro, AR 72467, USA. <sup>5</sup> :  
27 Plateforme Analytique, Université de Picardie, 33 Rue St Leu, 80039 Amiens, France. <sup>6</sup> : Plateforme  
28 d'Ingénierie cellulaire et d'Analyses des Protéines, CURS, Avenue Laënnec - 80054 Amiens cedex  
29 1, Université de Picardie. <sup>7</sup> : School of Chemical Sciences, The University of Auckland, Private Bag  
30 92019, Auckland 1142, New Zealand. <sup>8</sup> : Ghent University, Department of Plant Biotechnology and  
31 Bioinformatics, 9052 Ghent, Belgium. <sup>9</sup> : VIB Center for Plant Systems Biology, 9052 Ghent,  
32 Belgium.

33

34 \*: contributed equally to the work as senior authors.

35

36 **One sentence summary**

37 The processivity of AtPME2, a pectin methylesterase that fine-tunes cell wall pectins is modulated  
38 by pH *in vitro* and impacts the mechanical properties of the wall, affecting development *in planta*.

39

40

41 **Footnotes**

42 **Author's contribution**

43 L.H., O.H., A.V., F.F., CP-R, J.S., F.S., S.B., S.P., V.B., P.M., M-F.N., D.M. performed research  
44 and analyzed the results. D.M., B.J.S., T.B., A.B., VL and JP designed the research. V.L. and J.P.  
45 managed the project. V.L., J.P. wrote the manuscript with input from D.M., B.J.S. and A.B.

46

47 **Funding information**

48 This work was supported by grants from the Agence Nationale de la Recherche (ANR-12-BSV5-  
49 0001 GALAPAGOS and ANR PECTOSIGN). LH was recipient of a studentship from the “Trans  
50 Channel Wallnet” project, which was selected by the INTERREG IVA program France (Channel  
51 – England European cross-border cooperation program. The financial support from the Institut  
52 Universitaire de France (IUF) to JP is gratefully acknowledged.

53

54 **Present address:**

55 L.H. : Cellengo, 19 avenue de la Forêt de Haye, 54500 Vandoeuvre les Nancy. O.H. : Centre de  
56 Recherche et Innovation Soufflet, 1 rue de la Poterne à Sel, 10400 Nogent sur Seine, France. A.V. :  
57 INRAE, Institut Jean-Pierre Bourgin, UMR1318 INRAE-AgroParisTech, ERL3559 CNRS, Saclay  
58 Plant Sciences, 78026 Versailles, France. J.C.T : Donald Danforth Plant Science Center, 975 N.  
59 Warson Rd., St. Louis, MO 63132, USA.

60

61

62 **Corresponding author email:**

63 [jerome.pelloux@u-picardie.fr](mailto:jerome.pelloux@u-picardie.fr)

64 [valerie.lefebvre@u-picardie.fr](mailto:valerie.lefebvre@u-picardie.fr)

65

66 **Abstract**

67

68 Pectin methylesterases (PMEs) modify homogalacturonan's (HG) chemistry and play a key  
69 role in regulating primary cell wall mechanical properties. How PME activity can fine-tune pectin  
70 structure in the growing plant has remained elusive. Here we report on the Arabidopsis AtPME2,  
71 which we found to be highly expressed during lateral root emergence and dark-grown hypocotyl  
72 elongation. We produced the mature active enzyme using heterologous expression in *Pichia pastoris*  
73 and characterized it through the use of a generic plant PME antiserum suitable for detecting  
74 recombinant and native enzyme independent of species source. At neutral pH AtPME2 is  
75 preferentially active on pectins with a degree of 55-70% methylesterification and can be inhibited  
76 by PME inhibitor protein (PMEI). We show that the mode of action for AtPME2 can switch from  
77 full processivity (at pH 8), creating large blocks of unmethylated galacturonic acid, to low  
78 processivity (at pH 5) and relate these observations to the differences in electrostatic potential of the  
79 protein at acidic and alkaline pH. To assess the role of AtPME2 in development, we characterized  
80 two knock-out lines. We show that in the context of acidified apoplast, low-processive  
81 demethylesterification by AtPME2 can loosen the cell wall, with consequent increase in cell  
82 elongation and etiolated hypocotyl length. Our study brings insights into how the pH-dependent  
83 regulation by PME activity could affect pectin structure and associated cell wall mechanical  
84 properties in expansion.

85

## 86 Introduction

87

88

89

90

91

92

93

94

95

96

97

98

99

100

101

102

103

104

105

106

107

108

109

110

111

112

113

114

115

116

117

118

119

How plants control pectin's chemistry in cell walls is a central question in plant growth and development and in plant response to abiotic and biotic stresses. Pectins are complex polysaccharides that function as key structural elements regulating the mechanical properties of plant cell walls. Pectins are enriched in galacturonic acid and comprise four main domains: homogalacturonan (HG), rhamnogalacturonan-I (RG-I), rhamnogalacturonan-II (RG-II) and xylogalacturonan (XG). One key feature of HG chemistry, a homopolymer of  $\alpha$ -1,4-linked-D-galacturonic acid units, is the presence of methyl- and acetyl-ester substitutions along the polymer chain that modify its physical, chemical, and biochemical properties (Ridley et al., 2001). Plants synthesize HG as a highly methylesterified form (up to 80% methyl esters, occurring at the C-6 carboxyl position) and a low acetylated form (up to 5-10% acetyl ester, occurring at the O-2 or O-3 positions) in the Golgi apparatus, before being exported to the apoplastic space. The degree of methylesterification (DM) and degree of acetylation (DA), as well as the distribution of these substitutions on the backbone are fine-tuned at the cell wall by pectin methylesterases (PMEs, EC 3.1.1.11) and pectin acetylerases (PAE, EC 3.1.1.6), respectively (Pelloux et al., 2007). Pectin methylesterase action on HG is tightly regulated biochemically by proteinaceous inhibitors called pectin methylesterase inhibitors (PMEIs), or by pH and cations (Micheli, 2001). Resulting activity can introduce extensive de-methylesterified HG blocks that can bind  $\text{Ca}^{2+}$  ions cooperatively, creating so called "egg-box", cross-linked structures that promote cell wall rigidity (Willats et al., 2006). Limited de-methylesterified blocks may also provide substrate-binding sites for pectin-depolymerizing enzymes such as polygalacturonases (endo-PGs, EC 3.2.1.15) and pectin/pectate lyases-like (PLLs EC 4.2.2.2), which reduce HG's degree of polymerization (DP) and promotes the pectic network's deconstruction (Sénéchal et al., 2014b). Therefore, to relate the consequences of PME action on pectin substrates to changes in the cell wall's elasticity, it is key to determine their degree of processivity (*i.e.*, the extent PME hydrolyzes consecutive methylesters).

Plants are well described for expressing multiple PME isoforms with individual isozymes varying in tissue-specific expression patterns, biochemical properties, and action patterns. PMEs thereby likely function differentially in the cell wall during plant growth and development (Goldberg et al., 1996; Micheli, 2001; Pelloux et al., 2007). PMEs were indeed reported to play a key role in developmental processes as diverse as hypocotyl elongation (Pelletier et al., 2010), pollen tube growth (Leroux et al., 2015), root development (Hewezi et al., 2008), organogenesis at the shoot apical meristem (Peaucelle et al., 2008; Peaucelle et al., 2011), and gynoecium development (Andres-Robin et al., 2018). Contradictory reports showed that PME activity can either

120 induce cell wall stiffening or loosening, with distinct consequences on plant development (Peaucelle  
121 et al., 2015; Daher et al., 2018; Wang et al., 2020). This could at least partly be explained by the  
122 demethylation pattern that different PME isoforms would create in relation to their processivity,  
123 which could be regulated by the local cell wall microenvironment, including ion concentrations,  
124 apoplastic pH, enzyme's localization, and presence of inhibitory proteins.

125 Because plant PMEs are encoded by large multigenic family (e.g., 66 genes in Arabidopsis;  
126 Sénéchal, Wattier, et al., 2014), there is need to determine the expression profile and degree of  
127 processivity of individual isoforms to assess their potential for generating HG micro-domains that  
128 differ in de-methylesterified block sizes. Such micro-domains were recently reported to play a key  
129 role in determining the control of mucilage release in Arabidopsis seeds through interaction with  
130 peroxidases (Francoz et al., 2019). Plant PMEs typically have neutral to alkaline pH activity  
131 optimum (Jolie et al., 2010; Dixit et al., 2013) although few acidic isoforms are reported (Lin et al.,  
132 1989; Thonar et al., 2006). It is generally recognized that plant and microbial PMEs differ in their  
133 processivity. Plant and bacterial PMEs produce large blocks of demethylesterified HG by processive  
134 action, while fungal enzymes act more randomly on their substrate, providing single or limited  
135 consecutive demethylesterifications (Fries et al., 2007; Mercadante et al., 2013; Mercadante et al.,  
136 2014; Sénéchal et al., 2015; Kent et al., 2016). The structural determinants for differences in  
137 processivity were assessed (Mercadante et al., 2014; Kent et al., 2016), with key suggestions about  
138 the role of charged residues in certain subsites of the enzyme binding groove, and the interplay of  
139 electrostatic *versus* hydrophobic contacts in favoring substrate-binding and sliding along the groove  
140 to achieve processivity (Fries et al., 2007; Mercadante et al., 2014; Kent et al., 2016). The myriad  
141 of PME isoforms expressed in plants is however suggestive of a very fine regulation of the  
142 processive activity. The binding to certain methylation pattern and the enzymatic release after a  
143 certain number of de-methylesterification cycles are likely to be fine-tuned to modulate the physico-  
144 chemical properties of plant cell wall pectin in accordance to the micro-environment. PME  
145 processivity of an apple PME was shown to be pH-dependent, with a possible shift from a blockwise  
146 to non-blockwise mode of action (Denès et al., 2000), and processive fungal PMEs were also  
147 reported (Markovič and Kohn, 1984; Safran et al., 2021). Considering such complexity of the PMEs'  
148 landscape, it is therefore paramount importance to adopt a more comprehensive approach in which  
149 biochemical data are combined with structural and biophysical information of PMEs activity.  
150 Nevertheless, studying the crystal structure or mode of action of rare plant PMEs (i.e., low abundant  
151 proteins due to limited temporal and tissue-specific expression) has been impaired by the ability to  
152 produce purified native enzyme in quantities sufficient for refined structural studies. Routine

153 heterologous expression of effectively folded plant PME s has been challenging, thus their precise  
154 mode of action remains unresolved (Cheong et al., 2019).

155 We describe here the biochemical and functional characterization of Arabidopsis *AtPME2*  
156 (At1g53830), a group 2 PME (harboring a N-terminal extension, i.e. PRO-domain, showing  
157 sequence similarities with the PME I domain (Pfam04043)) which is strongly expressed in dark-  
158 grown hypocotyls and roots, and whose protein localizes at the cell wall. We successfully expressed  
159 active *AtPME2* in the yeast *Pichia pastoris*, and using generic PME antibodies generated from a  
160 designed peptide immunogen, we show that the PRO-part is important for processing the enzyme  
161 into its mature active form. We further determined that *AtPME2* is more active on moderately to  
162 highly methylesterified pectic substrates, with a high processivity at neutral pH, while it shows a  
163 low degree of processivity in acidic conditions. And finally, using loss-of-function mutant plants  
164 for *AtPME2*, we show that the enzyme may play a key role in controlling dark-grown hypocotyl  
165 development through modulating the cell wall's structural chemistry and mechanics. This study  
166 brings insights on how the differential expression of an individual Arabidopsis PME isoform having  
167 distinctive processivity for homogalacturonan may contribute to structural changes in the cell wall  
168 that affect plant development.

169



## 170 **Results**

171

### 172 ***AtPME2* gene is expressed in dark-grown hypocotyls and roots**

173

174 *AtPME2* (*At1g53830*) gene expression was followed using RT-qPCR transcript profiling in  
175 various organs (roots, dark-grown hypocotyls, leaves, stem, siliques, floral buds and seeds) and was  
176 found to be highly expressed in dark-grown hypocotyls and roots as compared to leaves, stem, floral  
177 buds and seeds. In contrast, no expression was detected in siliques (**Figure 1A**). During the time  
178 course of dark-grown hypocotyl development, an increase in *AtPME2* transcripts was measured up  
179 to 72 h post-induction (**Figure 1B**). This timing corresponds to the acceleration phase of growth  
180 according to previously published work (Pelletier et al., 2010). In contrast, *AtPME2* was stably  
181 expressed in roots during seedling development in the light (**data not shown**).

182 *AtPME2* promoter activity was further localized using a *GUS* reporter gene. Following plant  
183 transformation, GUS staining was assessed in light-grown and 4 day-old dark-grown seedlings. In  
184 etiolated hypocotyls, the promoter activity was mainly localized in the upper part of the organ  
185 (**Figure 1C, left panel**). During lateral root formation, no GUS staining was detected in the early  
186 stages (stages I to V) of primordia differentiation, while a strong signal was observed at later stages  
187 (from VI onwards) (**Figure 1C, upper panel**). In elongating roots (either primary, lateral or  
188 adventitious), *AtPME2* promoter activity was mainly present in the elongation zone (**Figure 1C,**  
189 **lower panel**).

190

### 191 ***AtPME2* protein is present as a processed isoform in the cell wall**

192 Using proteomic profiling, we identified pectin remodeling enzymes PME, PAE, PG, PLL  
193 and regulatory proteins PME1 and SBT (subtilase) in cell wall-enriched protein fractions isolated  
194 from either 4-day-old hypocotyls (**Supplemental Table IA**) and 7-day-old roots (**Supplemental**  
195 **Table IB**), of Col-0 and WS ecotypes. This survey confirmed that *AtPME2* was indeed present in  
196 cell wall-enriched protein fractions of both organs, thus supporting transcriptional data.

197 To further verify the secretion of *AtPME2* in the apoplasm, we designed a genetic construct  
198 tagging *AtPME2* with GFP attached at the C-terminus of the mature protein sequence. Following  
199 plant transformation, confocal imaging of plasmolyzed root cells that revealed GFP fluorescence  
200 was detected at both the cell wall and the cytoplasm (**Figure 1E**). This is consistent with *AtPME2*  
201 translocation to the cell wall where it acts to fine-tune pectin structure and with previous reports of  
202 the processing of nascent into mature protein during transport in Golgi vesicles (Micheli, 2001;  
203 Wolf et al., 2009).

204

205 **AtPME2 can be effectively produced and processed as an active isoform in *Pichia pastoris***

206 To produce pure active enzyme for biochemical studies we took into consideration the  
207 hypothesis that the PME1 domain functions as a chaperone during PME transport and processing  
208 (Micheli, 2001). We therefore inserted the full length AtPME2 coding sequence into the pPICZ  $\alpha$ B  
209 yeast expression vector, minus the plant secretory signal peptide and STOP codon (referred as “FL”  
210 construct, **Supplemental Figure 1**) and transformed *Pichia pastoris*. PME activity was detected in  
211 concentrated supernatants of induced transformants and recombinant AtPME2 purified after cation  
212 exchange chromatography as shown by SDS-PAGE (Coomassie-Blue stained gel) in **Figure 2A**.  
213 One band is present at ~30 kDa and two bands are observed at ~35 kDa, the latter corresponding to  
214 the approximate mass calculated from the sequence for the mature AtPME2 protein. The doublet is  
215 consistent with AtPME2 being cleaved at either of the processing motifs (RKLK and RRLL, see  
216 **Supplemental Figure 1**) by *Pichia pastoris* subtilisin protease. The identity of AtPME2 was  
217 confirmed by mass spectrometry of the tryptic peptides, matching 12 peptides of the mature protein  
218 (**Supplemental Figure 2**). The lower band, ~30 kDa, corresponds to the PRO-peptide, which was  
219 confirmed by matching 7 tryptic peptides (**Supplemental Figure 2**). Using *Pichia* expression  
220 system, we were thus able to produce the mature active AtPME2 enzyme, as well as recover the  
221 PRO-peptide.

222 To support detection and identification of plant PMEs such as AtPME2 in expression studies,  
223 we produced an antiserum that could be broadly selective for plant PMEs (ie generic for plants,  
224 independent of species source) in western blotting. Considering the sequences alignment of 45  
225 Arabidopsis PME catalytic domains (**Supplemental Figure 3A**), we chose a 15 amino acid peptide  
226 sequence (KTYLGRPWKEYSRTV) which is indeed highly conserved, notably in AtPME2  
227 (AT1G53830, PTYLGRPWKEYSRTV) and AtPME3 (AT3G14310, PTYLGRPWKEYSQTV)  
228 sequences, two of the proteins identified both in hypocotyls and roots in our proteomic analyses.  
229 Western blot analyses, used to assess this generic PME antibody, showed a strong antiserum binding  
230 signal for purified PME isoforms isolated from citrus (CsTT-PME, CsPME2 and CsPME4) and  
231 tomato (SIPME1) fruit (Savary, 2001; Savary et al., 2010; Savary et al., 2013) as well as purified  
232 AtPME3 (Sénéchal et al., 2015) (**Figure 2B** and **Supplemental Figure 3B**), thus supporting the  
233 generic antiserum provides a new tool for analyzing plant and Arabidopsis PMEs. To assess its  
234 sensitivity for detecting PMEs present in cell wall-enriched protein fractions, we used it to analyze  
235 Arabidopsis hypocotyl and root protein extracts. We detected antigen signals at approximately 35  
236 kDa, which is consistent with the predicted size of fully processed (mature) PME (**Figure 2C**).  
237 Additional bands were detected above ~55 kDa, which may represent unprocessed PME precursors.  
238 Finally, we performed western-blot analysis on the recombinant purified AtPME2, and detected the

239 two AtPME2 protein bands separated at molecular mass ~35 kDa (**Figure 2D**). A strong antigen  
240 band is also revealed with mass approaching 70 kDa, while no corresponding protein was observed  
241 in the stained protein gel (**Figure 2A**). We speculate this represents low amounts of either  
242 glycosylated unprocessed AtPME2 protein as observed in the hypocotyl and root immunoblots  
243 (**Figure 2C**), or possibly dimers formed during electrophoresis.

244

### 245 **Biochemical characterization of AtPME2**

246 The pH-dependency and sensitivity to inhibition by PMEI were determined for the purified  
247 AtPME2. Using the ruthenium red gel diffusion assay with high-DM pectins (> 85%) as a substrate,  
248 we showed that the enzyme was the most active at neutral pH (7.5), although it was still active at  
249 pH 5 (**Figure 3A**). AtPME2 activity was inhibited at the three pHs tested (5, 6.3 and 7.5) by the  
250 previously reported pH-insensitive AtPMEI9 inhibitor protein (Hocq et al., 2017b). This inhibition  
251 was positively correlated with increasing quantities of AtPMEI9 (**Figure 3A**). In addition, AtPME2  
252 could also be inhibited by pH-sensitive AtPMEI4 at pH 5 (**data not shown**).

253 We assessed AtPME2 activity on citrus pectins with varying degrees of esterification at the  
254 optimal pH 7.5. When using pectic substrates of low DA, AtPME2 activity was the strongest for  
255 DM 55 to 70% (40 nmol MeOH.min<sup>-1</sup>. µg proteins<sup>-1</sup>), and activity was reduced by ~half when using  
256 substrates of high (>85%) or low (24-30%) DM. AtPME2 was active on sugar beet pectins of DM  
257 42% and DA 34%, suggesting acetylation of GalA residues may minimally affect the enzyme's  
258 activity (**Figure 3B**). Using the best substrate (pectins DM 55% - 70%) and the optimal pH of 7.5,  
259 we determined the kinetic parameters of the enzyme and showed that the Km was 0.481 mM and  
260 the Vmax was 0.019 nmol MeOH.min<sup>-1</sup>.µg protein<sup>-1</sup> (**Figure 3C**).

261

### 262 **AtPME2 has a low degree of processivity in acidic conditions**

263 In order to get precise insights into AtPME2 activity, we designed an experimental set- up  
264 to characterize its degree of processivity. We first digested pectins of DM 55 to 70% with a fungal  
265 polygalacturonase (endo-PG from *Aspergillus aculeatus*) for 3 h to generate a population of HG  
266 oligogalacturonides (OGs) of various DP and DM. Following heat denaturation of PG activity, the  
267 processivity of AtPME2 was determined by characterizing the relative proportion of the resulting  
268 OGs, classified by DP and DM, after overnight incubation with 20 nmol AtPME2 at pH 8 and 80  
269 nmol AtPME2 at pH 5 (to compensate for the lower PME activity at acidic pH). As a control, we  
270 used the commercially available PMEs extracted from Citrus peels, which also present stronger  
271 activity at neutral pH compared to acidic pH (**data not shown**). The population of OG identified  
272 after PME digestion was then compared to that obtained in non PME-treated condition (named

273 hereafter control pH 8 and control pH 5). In control samples, we were able to detect different  
274 methylated forms for each DP, with a peak of relative abundance corresponding on average to  
275 slightly more than 50% DM (e.g. GalA7Me4, GalA8Me4, GalA10Me6), in accordance with the  
276 mean DM of the pectins used as a substrate. At optimal pH 8, when considering oligos of DP  
277 comprised between 3 and 10, for instance DP 10 (GalA10), the different methylated forms detected  
278 in the control samples (GalA10Me5, GalA10Me6, GalA10Me7) were totally absent in AtPME2-  
279 treated OGs. In contrast unmethylated OG trimers and tetramers were the predominant end-products  
280 that accumulated (**Figure 4A**). These OGs can result from the residual activity of *Aspergillus* PG  
281 in the reaction mixture: in absence of calcium *in vitro*, long blocks of unmethylated HG created by  
282 processive demethylesterification of pectins at pH8 are preferential substrates, leading to hydrolysis  
283 of the OGs pool. Similar results were obtained when using Citrus PME (**Supplemental Figure 4A**).

284 When PME treatment (AtPME2 and CsPME) was performed at pH 5, results were strikingly  
285 different. For a given DP, the proportion of highly methylesterified forms (> 50% DM) decreased  
286 in the PME-treated samples compared to control pH 5 (**Figure 4B, Supplemental Figure 4B**). OGs  
287 with lower DM appeared following treatment with PME (GalA10Me, GalA10Me2 and  
288 GalA10Me3, absent in control pH 5), and relative amount of higher DM decreased (GalA10Me5,  
289 GalA10Me6 and GalA10Me7) (**Figure 4B inset, Supplemental Figure 4B inset**). Results were  
290 similar for OGs of distinct DPs, including GalA6, GalA7, GalA8 and GalA9, with a shift in the  
291 abundance from highly methylesterified to low methylesterified forms of these OGs in PME-treated  
292 samples as compared to control pH5. These OGs of decreased DM are likely to have less affinity  
293 for residual *Aspergillus* PG as they were not further digested (**Figure 4B**). It has to be mentioned  
294 that those differences in the DM distributions are more pronounced when using AtPME2 compared  
295 to CsPME. For OGs of DP < 5, no differences were detected between samples, suggesting that  
296 PME2 and CsPME have a strong preference for substrates of DP > 5 at pH 5. Taken together, these  
297 results show that the degree of processivity of the two PMEs increases as the pH shifts from acidic  
298 towards neutral to alkaline pH.

299

### 300 **The electrostatic potential of PMEs correlates with their processivity**

301 Electrostatic properties have been identified as significant in order to rationalize the basis of  
302 PMEs processivity, with charge asymmetry along the binding groove being an important feature to  
303 promote the sliding of negatively charged, demethylesterified, polysaccharides (Mercadante et al.,  
304 2014). We chose to compare the electrostatic potentials of the 2 PMEs whose modes of action were  
305 determined in this study, in addition to a fungal acidic PME from *Aspergillus niger*, AnPME, whose  
306 random mode of action at both pH has already been published (Duvetter et al., 2006; Cameron et

307 al., 2008; Kent et al., 2016). Interestingly, AtPME2 and CsPME4 (the major isoform in the  
308 commercial PME from orange peel), which experimentally increase in processivity with increasing  
309 pH, show the largest differences in the electrostatic similarity indices, whereas AnPME, which has  
310 been indicated as a non-processive, acidic PME (Kent et al., 2016) shows little differences across  
311 pH (**Figure 5A**). Moreover, the projection of the electrostatic potential differences between acidic  
312 and alkaline pH on the protein surfaces, normalized to highlight the differences between AtPME2  
313 and CsPME4 or AnPME, show a concentrated positive charge patterning in the binding groove,  
314 with the largest difference observed for CsPME4 and small to no difference (electrostatic potential  
315 difference close to 0) for AnPME, as expected from comparing the action of these PMEs  
316 experimentally (**Figure 5B**).

317

### 318 **Loss of function in AtPME2 mutants can alter pectin remodeling enzyme activities**

319 To investigate AtPME2's role in controlling growth and development, two homozygous T-  
320 DNA insertional knockout (KO) lines, *pme2-1* (GK-835A09, in the third exon) and *pme2-2*  
321 (FLAG\_445B05, in the first exon), were identified in Arabidopsis Col-0 and WS backgrounds  
322 respectively. RT-PCR analyses revealed that both mutant lines were KO at the transcript level  
323 (**Figure 6A**). Consistent with this, no tryptic peptides from the catalytic domain of AtPME2 were  
324 detected by proteomic analyses performed on cell wall-enriched protein fractions from *pme2-1* and  
325 *pme2-2* hypocotyls (**Supplemental Table IA**). This ultimately shows that *pme2* allelic mutants are  
326 KO at the protein level. This was further supported by zymogram analysis where cell wall-enriched  
327 protein extracts from wild-type, *pme2-1* and *pme2-2* hypocotyls were resolved by isoelectric  
328 focusing (IEF) coupled with detection of PME activity. Results obtained showed no activity band  
329 at a pI of ~9 in the KO lines, which corresponds to the predicted pI of the mature part of AtPME2  
330 (**Figure 6B**). No changes in the activity of the other PME isoforms were apparent, suggesting that  
331 the absence of the AtPME2 protein is likely to impact total PME activity. This was further confirmed  
332 by measuring pectin remodeling enzymes activities of cell wall-enriched proteins of 4 day-old dark-  
333 grown hypocotyls. As anticipated, we observed that the total PME activity decreased in *pme2*  
334 mutants compared to wild-type (**Figure 6C**). Total PG activity measured in the same type of extracts  
335 was also reduced by 10 % and 20 % in *pme2-1* and *pme2-2*, respectively (**Figure 6D**). In roots, total  
336 PME and PG activities were as well decreased in *pme2* mutants, albeit to a lesser extent compared  
337 to what was observed in dark-grown hypocotyls (**Supplemental Figure 5A and 5B**).

338

339

340 **AtPME2 plays a role in controlling hypocotyl elongation through regulation of mechanical**  
341 **properties**

342 To determine if changes in pectin remodeling enzyme activities may affect seedling  
343 development, we first assessed the effects of the mutations on primary root length and lateral root  
344 emergence. In our experimental conditions, elongation of primary root was slightly impaired in both  
345 mutants, although only significantly in Col-0 background, in relation to the decrease in the length  
346 of fully elongated cells (**Supplemental Figure 5C, data not shown**). Considering AtPME2  
347 expression pattern, lateral root density was also assessed and results showed significant lower  
348 density only for Col-0 allele (**Supplemental Figure 5D**).

349 We next followed etiolated hypocotyl elongation over a time-course. The rationale for  
350 etiolated hypocotyls includes: i) In the hypocotyl, cell length increased in an acropetal wave starting  
351 approximately 48 hours after sowing, ii) AtPME2 is highly expressed in the upper part of a 4 day-  
352 old growing hypocotyl, below the hook, where cells are strongly elongating, so that the absence of  
353 AtPME2 in mutants should alter their development. Thus, we hypothesized KO mutants lacking  
354 AtPME2 activity will show altered hypocotyl development. Kinematic analysis showed hypocotyl  
355 length was significantly different in both alleles, with a reduction of 10% as compared to wild-type  
356 (**Figure 7A**). The differences between wild-type and *pme2* mutants were more important from 72 h  
357 onwards, which corresponds to the rapid elongation phase. To assess if the decrease in the length is  
358 related to changes in the mechanical properties of the cell wall, we measured the stiffness (as  
359 apparent Young's modulus) of the cell wall using atomic force microscopy (AFM, **Supplemental**  
360 **Figure 6**) in the *pme2-1* mutant and its corresponding wild-type Col-0. The stiffness of the  
361 epidermal cell wall at the basal part of 4-day-old hypocotyls, was similar between *pme2* and WT  
362 Col-0 (**Figure 7B, bottom panel**). In contrast, the apical part of hypocotyls (the zone where the  
363 promoter of *AtPME2* was shown to be active) showed a 10% increase in cell wall stiffness in the  
364 *pme2-1* mutant, compared to wild type (**Figure 7B, top panel**). As such, a more rigid cell wall in  
365 the *pme2-1* mutant could restrict hypocotyl elongation. The Young's modulus measured at the top  
366 of dark-grown hypocotyl was lower (~20 MPa) than that measured in the basal part (60 MPa), also  
367 reflecting the difference of cell wall stiffness in relation to growth rate.

368

369

## 370 Discussion

371 How the mode of action by individual pectin methylesterases affect pectin's chemistry and  
372 the mechanical properties of plant cell walls remains unresolved. This is in part due to the difficulty  
373 of obtaining purified single isoforms from plant material and to co-expression of multiple isoforms  
374 from this very large gene family. Here, we report on AtPME2, a PME expressed during lateral root  
375 emergence and in dark-grown hypocotyl elongation. Starting from its production in heterologous  
376 system and full biochemical characterization, we describe how its mode of action varies as a  
377 function of pH and assess how this might control plant development.

378 While *AtPME2* gene was previously found to be highly expressed during the growth  
379 transition phase in dark-grown hypocotyls (Pelletier et al., 2010), we show that, in 3 to 4 day-old  
380 seedlings, the *AtPME2* promoter is specifically active at the top of hypocotyls (**Figure 1**), a region  
381 with enhanced elongation at this stage (Refrégier et al., 2004; Peaucelle et al., 2015; Daher et al.,  
382 2018). The *AtPME2* promoter is also highly active in the root elongation zone, and during lateral  
383 root formation, as suggested by previous data sets (Brady et al., 2007; Hruz et al., 2008) and  
384 confirmed using RNA sequencing and immunocytochemistry (Wachsman et al., 2020). In lateral  
385 root primordia, the promoter's activity initiates at stage VI before emergence (Malamy and Benfey,  
386 1997), suggesting a role for AtPME2, together with other pectin remodeling enzymes (including  
387 PG) in the process of lateral rhizogenesis (Swarup et al., 2008; Kumpf et al., 2013; Hocq et al.,  
388 2020). Our findings are in accordance with this hypothesis (**Supplemental Figure 5**), and are further  
389 backed-up by a recent study showing that AtPME2 is of prime importance for determining lateral  
390 root mergence.

391 Our results support SBT-mediated processing of PME occurs in the cell before their  
392 deposition at the apoplast. Using C-terminal translational fusion, we showed AtPME2 to be present  
393 both at the cell wall and in the cytoplasm (**Figure 1A**). Cell wall-associated proteome fingerprinting  
394 analyses only identified peptides associated to mature AtPME2 and other PME isoforms from dark-  
395 grown hypocotyls and radicles in seedling (**Supplemental table IA, B**). Similar results obtained for  
396 other plant PME, in several organs, indicates thus an ubiquitous processing mechanism (San  
397 Clemente and Jamet, 2015; Sénéchal et al., 2015; Hervé et al., 2016; Nguyen-Kim et al., 2016).

398 Using heterologous expression to obtaining sufficient amounts of plant PME for biochemical  
399 analysis has often turned out to be challenging, despite early reports showing that AtPME31 and  
400 AtPME12 can be expressed in *E. Coli* (Dedeurwaerder et al., 2009; Cheong et al., 2019), or that an  
401 acidic PME from Jelly fig can be produced in yeast (Peng et al., 2005). While we initially failed to  
402 produce mature AtPME2 (group 2 plant PME) in *Pichia*, we subsequently showed that the PRO  
403 domain was required for proper cleavage and release of a functional PME. Our results support the

404 hypothesis that the PRO domain supports recognition of processing motifs, RCLK and RRL in  
405 AtPME2, by endogenous yeast subtilisins, including KEX2 and SUB2 (Bader et al., 2008; Salamin  
406 et al., 2010). *In planta*, PME and SBTs are co-expressed during development and the S1P-mediated  
407 processing of group 2 PMEs is required for the export of active enzymes in the cell wall (Wolf et  
408 al., 2009). It was further suggested that the PRO-region inhibits group 2 PMEs activity during  
409 transport through the secretory pathway (Bosch, 2005; Bosch and Hepler, 2005; Dorokhov et al.,  
410 2006). The approaches and tools that we have developed now open the way to deciphering the  
411 interaction of PME with SBT.

412 We found that AtPME2 has an optimal activity at weakly alkaline pH (**Figure 3A**), like  
413 Arabidopsis AtPME3 and AtPME31 (Dedeurwaerder et al., 2009; Sénéchal et al., 2015). The  
414 predicted pI~9 for AtPME2 might explain the pH-dependency of the enzyme's activity as it was  
415 previously shown that most plant and bacterial PMEs have a neutral to alkaline pI, while fungal  
416 enzymes are acidic (Sénéchal et al., 2014b). AtPME2 is inhibited *in vitro* by both pH-sensitive and  
417 pH-insensitive PMEIs (AtPMEI4 (data not shown) and AtPMEI9 (**Figure 3A**), respectively) (Hocq,  
418 Sénéchal, et al., 2017). This suggests that it might be the target of multiple inhibitors at the cell wall,  
419 which further questions the role of such diversity of PME-PMEI interactions.

420 We applied a newly developed LC-MS/MS oligosaccharide-profiling approach, that  
421 determines DP and methylation of OGs, for analysing PME processivity (Voxeur et al., 2019; Hocq  
422 et al., 2020). We determined that AtPME2 presents a non-processive mode of action at pH 5, close  
423 to cell wall pH, while it is processive at pH8, close to its optimum of activity (Hocq et al., 2017).  
424 Processive behaviour of plant and bacterial PMEs have been described in details (Willats et al.,  
425 2006; Jolie et al., 2010), and the structural determinants of the processivity of the *Erwinia* PME was  
426 unraveled using molecular dynamic (MD) simulations (Mercadante et al., 2013; Mercadante et al.,  
427 2014), where the rotation of monosaccharide subunits in the binding groove of the enzyme was  
428 shown to be a key determinant of the processivity. In contrast to plant and bacterial PMEs, fungal  
429 enzymes are often regarded as non-processive. The elucidation of the 3D structure of a non-  
430 processive, salt-requiring, PME from *Aspergillus niger* demonstrated key differences between  
431 processive and non-processive isoforms, highlighting the importance of the electrostatic potentials  
432 of the enzymes in determining their processivity (Kent et al., 2016). This is in accordance with our  
433 experimental observations of the differences in processivity observed at different pH for the plant  
434 PMEs. Differences in the electrostatic similarity indices (Blomberg et al., 1999; Wade et al., 2001)  
435 calculated at two different pH can therefore yield an understanding of the different properties of  
436 PMEs at different pH. Interestingly, the comparison of the electrostatic potentials of PMEs either  
437 active in basic or acidic conditions suggests that differences between the electrostatic potentials at



438 acidic and alkaline pH are particularly concentrated in proximity of subsites -2 and -3, which have  
439 been identified as preferentially docking negatively charged de-methylesterified galacturonic acid  
440 monomers; non-processive AnPME show the absence of positive patches in these subsites. Our  
441 results clearly demonstrate that the pH-dependency of the mode of action of PMEs, previously  
442 suggested in early reports on apple PME (Catoire et al., 1998), might be a key to fine-tune enzymes  
443 activity in cell wall microenvironments defined by local pH. Localized changes in apoplastic pH  
444 were indeed previously shown to be of major importance for auxin-mediated hypocotyl elongation  
445 (Fendrych et al., 2016). As such, pH-dependent changes in PME mode of action might explain a  
446 number of unexpected results linking pectin chemistry to cell wall mechanical properties gathered  
447 over the last 10 years. Based on *in vitro* studies on pectin-based gels, it was assumed that  
448 demethylesterification of pectins by plant PME should lead to large stretches of negatively-charged  
449 GalA that can cross-link with calcium ions, stiffening the wall (Willats et al., 2001). However, this  
450 scheme appears contradictory with reports showing that overexpressing plant PMEs lead to reduced  
451 stiffness of the wall, through decreased values of the Young's modulus (Peaucelle et al., 2011a;  
452 Peaucelle et al., 2015; Wang et al., 2020). Supported by our results on AtPME2, a possible  
453 explanation of these apparent contradictory reports might reside in the fact that, within the acidic  
454 context of the cell wall, PME mode of action is not what was inferred from *in vitro* studies and may  
455 change according to pH microenvironments.

456 To assess whether the absence of AtPME2 can have consequences on development, we  
457 analyzed two T-DNA alleles, *pme2-1* and *pme2-2*, knock-out at the gene and protein levels. We  
458 showed that *pme2* mutants had reduced root length as well as reduced lateral roots density, compared  
459 to the control. Dark-grown hypocotyls of *pme2* mutants were shorter compared to wild-type, which  
460 correlated with an increase in cell wall's Young's Modulus in elongating cells of this organ, at the  
461 top of the hypocotyl. In addition, these mutants showed decreased PME as well as reduced PG  
462 activities. It therefore appears that, in *pme2* mutants, higher methylesterification of pectins would  
463 prevent their hydrolysis by PGs, reducing elongation through stiffening the walls. Our results are in  
464 accordance with those presented by Peaucelle et al. (Peaucelle et al., 2011; Peaucelle et al., 2015),  
465 either in elongating organs such as our model, or in meristems, where softening of the wall is a  
466 prerequisite for organ initiation. In both cases, softening of the wall was correlated with higher 2F4  
467 labelling (Braybrook and Peaucelle, 2013; Peaucelle et al., 2015).

468

## 469 **Conclusions**

470 According to our results, in the acidic context of the cell wall, AtPME2 would participate to pectin  
471 demethylesterification by randomly acting on the HG chains, leading to the creation of substrates

472 for PG, and consequent destructurement of HG. The somehow contrasting reports linking pectins to  
473 cell wall mechanics (Peaucelle et al., 2015; Daher et al., 2018) might be partially explained by our  
474 results, suggesting that pH plays a key role in changing PME processivity, thereby affecting pectin  
475 mechanical properties. Our biochemical data support a model for which the regulation of PME  
476 activity by microdomains of distinct pH might be a key to link pectin chemistry to cell wall  
477 mechanics.

478

479

480

481

## 482 **Material and Methods**

### 483 **Plant material and growth conditions**

484 Two *Arabidopsis thaliana* homozygous T-DNA insertion lines for *At1g53830* (*PME2*) were  
485 selected by PCR (see primers in **Supplemental Table II**): *pme2-1* is in Col-0 ecotype (, GK-  
486 835A09, in the third exon) and *pme2-2* in WS ecotype (FLAG445B05, in the first exon). For  
487 RT-qPCR analysis of *AtPME2* gene expression, seeds from Columbia-0 (Col-0) background were  
488 sowed either on soil or on plates containing ½ MS solid media and grown in light and dark  
489 conditions as previously described (Hocq et al., 2020). For kinetic phenotyping of hypocotyls, seeds  
490 from the four genotypes were sterilized and sown *in vitro* (Hocq et al., 2020). They were then put  
491 in the dark at 21°C for 6 days in a phenobox chamber. This specific growth chamber is designed to  
492 receive 27 square Petri dishes (12cm\*12cm) and to allow automatic image acquisition of each one  
493 using a 36 Mpix D810 camera (Nikon, Champigny sur Marne, France) fixed onto a robotic arm  
494 (Optimalog, Saint-Cyr-sur-Loire, France). Pictures were taken every 4 hours, during the first 20  
495 hours, and then every 2 hours. Images from each seedling were analyzed by a specific software  
496 (Optimalog) for measurement of hypocotyl length. For each biological replicate, at least 40  
497 hypocotyls were analyzed.

498

### 499 **Analysis of gene expression by RT-qPCR**

500

501 Total RNAs extraction, cDNA synthesis and RT-qPCR experiments were performed as previously  
502 described (Hocq et al., 2020) using specific primers for *AtPME2* (**Supplemental Table II**) Relative  
503 expression was normalized according to the most stable reference genes, identified with Genorm in  
504 each sample panels (Vandesompele et al., 2002): *CLA* (*At5g46630*, for different organs) and *TIP41*  
505 (*At4G34270* for dark-grown hypocotyl development. Method used to determine relative expression  
506 was previously described.(Sénéchal et al., 2014). Two to three biological replicates were realized,  
507 with two technical replicates each.

508

### 509 **Promoter amplification, plant transformation and GUS staining**

510 Amplification of the promoter sequence of *AtPME2* (~2 kb upstream of the *AtPME2* transcription  
511 start) was performed using the specific primers (**Supplemental Table II**). The purified PCR product  
512 was subsequently cloned into pBI101.3 (Ozyme, Saint-Cyr l'Ecole, France), upstream of *GUS*  
513 coding gene. Transformation, plant selection, GUS staining and image acquisition was as previously  
514 described (Hocq et al., 2020).

515

## 516 **Fusion of *AtPME2* coding sequence with fluorescent tag and confocal imaging**

517 *Atlg53830* coding sequence was amplified from Riken pda01692 by PCR using Phusion Hot Start  
518 II DNA Polymerase (Thermo Scientific, F549) and specific primers (**Supplemental Table II**). PCR  
519 product was fused to GFP CDS in pGBW454 under the control of CaMV-P35S promoter using LR  
520 cloning. *Rhizobium radiobacter* (C58C1) was transformed with pGBW405 recombinant vector *via*  
521 electroporation and used for transformation of Arabidopsis. After selection of transformants, roots  
522 were incubated with propidium iodide (IP, 0.1 mg ml<sup>-1</sup>, Sigma-Aldrich, # P4864, St. Louis, MO,  
523 USA) for 20 minutes, transferred in 1 M sorbitol solution to plasmolyze cells before observation  
524 under confocal microscope (Zeiss, LMS 780). Excitation wavelenghtes are 370-560 nm and 488 nm  
525 for IP and GFP respectively, and emission wavelenghtes are 631 nm and 493-549 nm, respectively.

## 526 527 **AtPME2 cloning and overexpression in *Pichia pastoris* and purification**

528 For cloning in expression vector, the coding sequence, minus the signal peptide, of *Atlg53830* was  
529 amplified from Riken pda01692, using the Phusion Hot Start II DNA Polymerase and specific  
530 primers (**Supplemental Table II**) The amplified full-length sequence, referred as “FL”, was cloned  
531 in frame with polyHis sequence into pPICZαB (ThermoFisher Invitrogen™) as previously described  
532 (Hocq *et al.* 2020). Transformation, selection of transformants and cultures were performed as  
533 previously described (Hocq *et al.*, 2020). Culture supernatants recovered following centrifugation,  
534 were applied onto a CM-FF Hi trap cation-exchange column following the manufacturer’s  
535 instructions (GE-Healthcare). Fractions with PME activity were pooled and concentrated. For LC-  
536 MS determination of the mode of action, aliquots of AtPME2 were exchanged into 100 mM  
537 ammonium acetate pH 5, or 20 mM Tris HCl pH 8 using PD SpinTrap G-25 (GE-Healthcare, 28-  
538 9180-04) following manufacturer’s recommendations.

## 539 540 **Mass spectrometry analysis of PMEs**

541 Cell wall-enriched protein fractions from 4 day-old dark-grown hypocotyls (WT and *pme2* mutants)  
542 and roots (WT) were extracted from 50 mg frozen fine powder according to method previously  
543 described (Sénéchal *et al.*, 2014a). Equal amounts of proteins were resolved on SDS-PAGE for each  
544 condition. Tryptic peptides from excised bands were separated and analysed as previously described  
545 (Sénéchal *et al.*, 2014a). Following purification of AtPME2 by cation exchange chromatography,  
546 bands corresponding to putative mature and PRO part were excised and treated as described above.

## 547 548 **PME-specific antibodies and Western blot analysis**

549 For Western blot analysis of recombinant AtPME2, AtPME3 (Sénéchal *et al.*, 2015), purified native

550 sweet orange and tomato PME (Savary, 2001; Savary et al., 2010; Savary et al., 2013), and cell  
551 wall-enriched protein extracts from dark-grown hypocotyls and roots, were separated onto a SDS-  
552 PAGE and proteins were transferred to Hybond-P PVDF transfer membrane (GE Healthcare,  
553 Amersham™ RPN303F) using the manufacturer's instructions and a Trans-Blot TURBO Transfer  
554 System (Bio-Rad, 170-4155) at 0.1A for 30 min. Blotted membranes were blocked with BSA and  
555 incubated for 2 h at room temperature with 1:3000 dilution of anti-PME primary antibody. This  
556 polyclonal antibody was raised in rabbits against a synthetic peptide (CKTYLGRPWKEYSRT)  
557 (Genscript, Piscataway, NJ, USA) that includes the highly conserved amino acid sequence including  
558 residue in the catalytic site of PMEs (Markovič and Janeček, 2004). Blotted membrane was probed  
559 with 1:5000 dilution of anti-rabbit secondary antibody coupled with peroxidase (ThermoFisher,  
560 31460), followed by detection with the chemiluminescent substrate (ECL™ Prime Western Blotting  
561 System, GE Healthcare, RPN2232).

562

### 563 **PME activity assays**

564 Total PME activity was quantified on cell wall-enriched protein extracts using commercial citrus  
565 pectins (DM >85% P9561, Sigma-Aldrich) and the alcohol oxidase-coupled colorimetric assay  
566 (Klavons and Bennet, 1986; L'Enfant et al., 2015). Substrate specificity of recombinant AtPME2  
567 activity was determined at pH 7.5 and 28°C using commercial citrus pectin (Sigma-Aldrich, DM  
568 >85%, P9561; DM 55-70, P9436; DM 20-34%, P9311), sugar beet pectin (DM 42%, degree of  
569 acetylation 31% (CPKelco). Results were expressed as nmol MeOH min<sup>-1</sup> μg<sup>-1</sup> of protein using a  
570 methanol standard curve. The kinetic parameters, V<sub>max</sub> and K<sub>m</sub>, were determined on citrus pectin  
571 (DM 55-70%, Sigma-Aldrich, P9436). The reactions were performed with 3 to 6 replicates using  
572 substrate concentrations ranging from 0.125 to 2 mg mL<sup>-1</sup>. The kinetic data were calculated by the  
573 Hanes-Wolf plot. Total PG activity from cell wall enriched dark-grown hypocotyl extract was  
574 determined as previously described (Hocq et al., 2020). The effects of pH on purified AtPME2  
575 activity; the inhibition assays with PME19 were quantified by gel diffusion (Downie et al., 1998)  
576 with some modifications (Ren and Kermodé, 2000).

577

### 578 **Oligosaccharide oligoprofiling**

579 To determine the mode of action of recombinant AtPME2, first, 0.4% (w:v) citrus pectin DM 55-  
580 70 % (Sigma, Cat. No. P9436) were first subjected to a 2 h digestion in ammonium acetate buffer  
581 100mM pH4 at 40 °C by 2.9 U.mL<sup>-1</sup> of *Aspergillus acuelatus* endo-polygalacturonase M2  
582 (Megazyme, Bray, Ireland) to generate OGs which differ in their degrees of polymerization and  
583 methylesterification. After addition of 1 volume absolute ethanol and centrifugation (5 min, 5000g),

584 the upper phase containing OGs was divided in two tubes, evaporated, and re-suspended either in  
585 ammonium acetate 100mM pH 5, or in Tris HCl 20mM pH 8. After heat-inactivation of PG, OGs  
586 were treated for 16h at 40°C by 80 nmol/min of purified AtPME2 either at pH 5 (Buffer) or 20  
587 nmol/min at pH 8 (Buffer) in order to compensate for the difference in activity measured at both  
588 pH. Chromatographic separation of OGs by size exclusion chromatography (SEC), MS-detection  
589 and data acquisition and processing were performed as previously described (Hocq et al., 2020).

590

### 591 **Calculation and comparison of protein electrostatics**

592 3D models of putative mature parts of Arabidopsis AtPME2 and Orange PME (CsPME4) were  
593 created using the I-TASSER prediction software (Zheng et al., 2019), with *D. carota* PME  
594 (PDB:1GQ8), (Johansson et al., 2002) as starting model. Protein electrostatic potentials were  
595 obtained by solving the linearized version of the Poisson-Boltzmann (PB) equation using APBS  
596 version 3.0 (Baker et al., 2001). Atomic radii and partial charges were assigned according to the  
597 AMBER99 force field parameters (Wang et al., 2000), using PDB2PQR version 2.1.1 (Dolinsky et  
598 al., 2004). The structures of AtPME2, AnPME (PDB: 5C1C) and CsPME4 were protonated  
599 considering the protonation states empirically estimated using PROPKA version 3.3 (Søndergaard  
600 et al., 2011) at either pH 5.0 or pH 8.0. The solution of the PB equation was discretized on a 19.3  
601 nm<sup>3</sup> grid with spacing of 0.6 Å, centered on the C<sub>α</sub> atom of one of the PMEs catalytic aspartic acid  
602 residues, conserved across PMEs. Solvent dielectric was set at a value of 78.5 to account for an  
603 aqueous environment, whereas solute dielectric and temperature were set to 4.0 and 298.15 K  
604 respectively. Potentials calculated at pH 8.0 were then subtracted, grid point by grid point, from the  
605 potentials calculated at pH 5.0 to obtain an electrostatic potential difference. A numerical  
606 comparison of the electrostatic potentials was achieved by calculating electrostatic similarity indices  
607 as the cross-product between two electrostatic potentials:

$$608 \quad SI_{a,b}^H = \frac{2\phi_a(i,j,k)\phi_b(i,j,k)}{(\phi_a^2(i,j,k) + \phi_b^2(i,j,k))}$$

609 Where  $\phi_a^2(i,j,k)$  and  $\phi_b^2(i,j,k)$  are the electrostatic potentials calculated at the grid points  $i,j,k$  for  
610 proteins  $a$  and  $b$  (Blomberg et al., 1999; Wade et al., 2001).

611

612

### 613 **Atomic Force Microscopy (AFM) measurements**

614 The protocol was adapted from (Milani et al., 2011) and applied to wild type and *pme2-1* hypocotyls  
615 at 3 days after induction of germination. Hypocotyls were immobilized and covered with water.  
616 Measurements were performed as close as possible (typically ~ 1 mm) to the hook (**Supplemental**  
617 **Figure 6A**). We used cantilevers with pyramidal tip and spring constant 5-6N/m. We analysed three  
618 regions of size 60µmx60µm per hypocotyl and obtained force-depth curves on ~60 points along the  
619 top of visible cells (**Supplemental Figure 6B**), with maximal depth 100-400 nm. Apparent Young's  
620 modulus was obtained by fitting the 0-100 µm depth range of the force-depth curve with the  
621 Sneddon model for a cone of half-angle 18°, assuming a Poisson ratio of 0.3 for the cell wall  
622 (**Supplemental Figure 6C**). We pooled together all values of modulus for a given hypocotyl.

623

### 624 **Statistical analysis**

625 Data represent the mean ± SE and were treated with R software (R development Core Team, 2008).  
626 Normality of data and equality of variances were assessed using Shapiro-Wilk and F-tests,  
627 respectively. Non-parametric Wilcoxon test was carried out for pairwise comparisons. Significant  
628 differences between two groups were determined as highly significant for  $p < 0.001$  (\*\*\*),  
629 significant for  $p < 0.1$  (\*\*), and moderately significant for  $p < 0.05$  (\*), while ns indicates non-  
630 significant differences.

631

### 632 **Accession numbers**

633 Nucleotide sequence data from this article can be found in The Arabidopsis Information Resource  
634 database under the following accession numbers: *AtPME2*, *AT1G53830*; *AtAtPMEI9*,  
635 *AT1G62770*; *CLA*, *AT5G46630*; *APT1*, *AT1G27450*; *TIP41*, *AT4G34270*. Protein data from this  
636 article can be found in UniprotKB database under the following accession numbers: *AtPME2*,  
637 Q42534; *AtPME3*, O49006; *AtPMEI9*, Q9SI72.

638

639

640 **Figure legends**

641

642 **Figure 1: *AtPME2* gene is highly expressed in roots and dark-grown hypocotyls and targeted**  
643 **at the cell wall**

644 *AtPME2* gene expression was quantified (A) on different organs and quantified using *CLATHRIN*  
645 (*At5g46630*) as a reference gene, (B) on various stages of dark-grown hypocotyl elongation (up to  
646 96h post-induction) and quantified using *TIP41* (*At4G34270*) as a reference gene and (C)  
647 Localization of *AtPME2* promoter activity during in 4 day-old dark-grown hypocotyl (left, scale  
648 bar: 1 mm) and lateral root initiation (right, scale bars: 100  $\mu$ m). (D) Subcellular localization of the  
649 *AtPME2* protein. Arabidopsis plants were transformed with *Rhizobium radiobacter* containing a  
650 35S::*AtPME2*-GFP construct and GFP fluorescence was imaged in 6-day old roots under confocal  
651 microscope. 1. Brightfield imaging of plasmolyzed root cells, 2. *AtPME2*-GFP fused protein signal,  
652 3. Propidium iodide staining of the cell walls. Scale bar: 50  $\mu$ m; Arrows indicate retraction of the  
653 tonoplast due to plasmolysis.

654

655 **Figure 2: *AtPME2* is effectively produced in *Pichia pastoris***

656 (A) *AtPME2* mature protein recovered from *Pichia pastoris* culture supernatant (purified by ion  
657 exchange chromatography) was separated by SDS-PAGE (Coomassie-Blue stained gel). Closely  
658 related bands at a MW ~35 kDa represent the two forms of processed enzymes (see scheme of  
659 protein structure above, including processing motifs). The lower band represent the PRO part. (B)  
660 Design of a peptide antibody that can detect sweet orange and tomato PME isoforms. The generic  
661 anti PME antibody was designed on a highly conserved part of the mature protein (see alignment).  
662 Western blot analysis allowed detection of purified PMEs, 1: CsTT-PME (*Citrus sinensis* thermally-  
663 tolerant isozyme; (Savary et al., 2013)), 2: CsPME2 (*C. sinensis* fruit-specific salt-independent  
664 isozyme, (Savary et al., 2010), 3: CsPME4 (*C. sinensis* salt-dependent isozyme, (Savary et al.,  
665 2010)), and SIPME1 (*Solanum lycopersicum* isozyme (Savary, 2001). (C) Western blot analysis of  
666 cell- wall-enriched protein extracts from 7 day-old roots and 4 day-old dark grown hypocotyls using  
667 the anti PME antibody. Both processed and non-processed forms of PME can be detected. (D)  
668 Western blot detection of *AtPME2* purified by cation-exchange chromatography from concentrated  
669 *Pichia* culture media.

670

671 **Figure 3: *AtPME2* is active and can be inhibited by PME1**

672 (A) pH-dependence of *AtPME2* activity. Activity of purified *AtPME2* was assessed at three distinct  
673 pH (5, 6.3 and 7.5) with increasing quantities of the pH-independent *AtPMEI9*. Activity was



674 determined with the gel diffusion assay using pectins DM 85% as a substrate and ruthenium red  
675 staining. The diameter of the halo reflects PME activity. **(B)** Substrate specificity of AtPME2.  
676 Activity of purified AtPME2 on pectic substrates with increasing degree of methylesterification  
677 (DM) was determined at an optimal pH of 7.5. Data represent the mean  $\pm$  SE of three to five  
678 replicates. HG: Homogalacturonan, DA: Degree of acetylation. **(C)** Determination of  $K_m$  and  $V_{max}$   
679 for AtPME2. Activity was assessed using various concentrations of pectins DM 55-10% at 37°C  
680 and pH 7.5.

681

#### 682 **Figure 4: Determination of AtPME2 mode of action using an LC-MS/MS**

683 Comparisons of the oligogalacturonides (OGs) produced following demethylesterification by  
684 AtPME2 at **(A)** pH 8 and **(B)** pH 5. A population of OGs of various degree of polymerization (DP)  
685 and degree of methylesterification (DM) was first generated by action of *Aspergillus aculeatus*  
686 polygalacturonase during 2 h at 40°C. After heat denaturation of the PGs, the OGs were incubated  
687 overnight at 40°C with buffer (black bars) or isoactivities of AtPME2 at pH 5 and pH 8 (white bars).  
688 OGs were separated using SEC and analyzed using MS/MS. Data represent the mean  $\pm$  SE of three  
689 replicates.

690

#### 691 **Figure 5: Electrostatic potential of AtPME2 is pH-dependent**

692 **(A)** Difference between the electrostatic similarity indices of AtPME2, CsPME4 and AnPME at pH  
693 5.0 (acidic) and pH 8.0 (basic). **(B)** Electrostatic potentials of the three PME isoforms projected on  
694 the protein surfaces. The electrostatic potentials are the resultant of the subtraction between the  
695 electrostatic potentials obtained at pH 8.0 from the one obtained at pH 5.0 for each protein. The  
696 potentials of AnPME and CsPME4 have been then divided by the electrostatic potential of AtPME2  
697 to better show the comparison with AtPME2.

698

#### 699 **Figure 6: Defect in AtPME2 leads changes in pectin remodeling enzyme activities**

700 **(A)** Schematic representation of *AtPME2* gene structure and localisation of the T-DNA insertions  
701 for *pme2-1* (GK-835A09, in the third exon) and *pme2-2* (FLAG\_445B05, in the first exon). PCR  
702 analysis of *pme2-1*, *pme2-2* and WT (Col-0 and WS) hypocotyl cDNAs using specific primers  
703 flanking the T-DNA insertion sites. *EF1*□ was used as reference gene. **(B)** Isoelectric focusing (IEF)  
704 of cell wall-enriched protein extracts from 4 day-old dark-grown hypocotyls of wild type Col-0/WS  
705 and *pme2-1/pme2-2* mutants. The same PME activities (15 mU) were loaded for each genotype.  
706 PME isoforms were separated and zymogram of PME activity was performed by incubating the gel  
707 with pectins (DM > 85 %), followed by ruthenium red staining. Similar observations were obtained

708 from two independent experiments. Black arrow indicates the disappearance of an activity at a pI  
709 ~9 in *pme2* mutants. (C) Total PME activity of cell wall-enriched protein extracts from 4 day-old  
710 dark-grown hypocotyls of wild type Col-0/WS and *pme2-1/pme2-2* mutants. Data represent the  
711 means of PME activity in nmol of methanol.min<sup>-1</sup>/μg of protein<sup>-1</sup> ± SE of three independent protein  
712 extractions and three technical replicates (n=9). (D) Total PG activity of cell wall-enriched protein  
713 extracts from 4 day-old dark-grown hypocotyls of wild type Col-0/WS and *pme2-1/pme2-2* mutants.  
714 Data represent the means of PG activity in nmol of PGA.min<sup>-1</sup>/μg of protein<sup>-1</sup> ± SE of three  
715 independent protein extractions and three technical replicates (n=9). Significant differences  
716 (p<0.05\*) were determined according to Wilcoxon test. Non-significant differences are indicated  
717 with ns.

718

719 **Figure 7: Defect in AtPME2 leads increased cell wall stiffness and reduced hypocotyl length**

720 (A) Growth kinematic analysis of etiolated hypocotyls of wild type Col-0 (black bar), WS (grey  
721 bar), *pme2-1* (white bar) and *pme2-2* (hatched bar). Data represent the means of length in mm ± SE  
722 (n > 30) for each condition. (B) Cell wall stiffness of Col-0 (black bar) and *pme2-1* (white bar)  
723 assessed by Atomic Force Microscopy on 3 day-old dark-grown hypocotyls at the bottom part  
724 (bottom panel) and below the hook (top panel). Significant differences (p<0.001\*\*\*) were  
725 determined according to Wilcoxon test. Non-significant differences are indicated with ns.

726

727

728

729 **Literature Cited**

- 730 **Andres-Robin A, Reymond MC, Dupire A, Battu V, Dubrulle N, Mouille G, Lefebvre V,**  
731 **Pelloux J, Boudaoud A, Traas J, et al** (2018) Evidence for the regulation of  
732 gynoecium morphogenesis by ETTIN via cell wall dynamics. *Plant Physiology* **178**:  
733 1222–1232
- 734 **Bader O, Krauke Y, Hube B** (2008) Processing of predicted substrates of fungal Kex2  
735 proteinases from *Candida albicans*, *C. glabrata*, *Saccharomyces cerevisiae* and *Pichia*  
736 *pastoris*. *BMC Microbiology* **8**: 116
- 737 **Baker NA, Sept D, Joseph S, Holst MJ, McCammon JA** (2001) Electrostatics of  
738 nanosystems: Application to microtubules and the ribosome. *Proceedings of the*  
739 *National Academy of Sciences of the United States of America* **98**: 10037–10041
- 740 **Blomberg N, Gabdoulline RR, Nilges M, Wade RC** (1999) Classification of protein  
741 sequences by homology modeling and quantitative analysis of electrostatic similarity.  
742 *Proteins: Structure, Function and Genetics* **37**: 379–387
- 743 **Bosch M** (2005) Pectin Methylesterases and Pectin Dynamics in Pollen Tubes. *the Plant Cell*  
744 *Online* **17**: 3219–3226
- 745 **Bosch M, Hepler PK** (2005) Pectin methylesterases and pectin dynamics in pollen tubes.  
746 *Plant Cell* **17**: 3219–3226
- 747 **Brady SM, Orlando DA, Lee JY, Wang JY, Koch J, Dinneny JR, Mace D, Ohler U,**  
748 **Benfey PN** (2007) A high-resolution root spatiotemporal map reveals dominant  
749 expression patterns. *Science* **318**: 801–806
- 750 **Braybrook SA, Peaucelle A** (2013) Mechano-chemical aspects of organ formation in  
751 *Arabidopsis thaliana*: the relationship between auxin and pectin. *PLoS one* **8**: e57813–  
752 e57813
- 753 **Cameron RG, Luzio GA, Goodner K, Williams MAK** (2008) Demethylation of a model  
754 homogalacturonan with a salt-independent pectin methylesterase from citrus: I. Effect of  
755 pH on demethylated block size, block number and enzyme mode of action.  
756 *Carbohydrate Polymers* **71**: 287–299
- 757 **Catoire L, Pierron M, Morvan C, Hervé Du Penhoat C, Goldberg RE** (1998)  
758 Investigation of the Action Patterns of Pectinmethylesterase Isoforms through Kinetic  
759 Analyses and NMR Spectroscopy IMPLICATIONS IN CELL WALL EXPANSION\*.
- 760 **Cheong MS, Lee DY, Seo KH, Choi GH, Song YH, Park KH, Kim JH** (2019)  
761 Phenylephrine, a small molecule, inhibits pectin methylesterases. *Biochemical and*  
762 *Biophysical Research Communications* **508**: 320–325
- 763 **Daher FB, Chen Y, Bozorg B, Clough J, Jönsson H, Braybrook SA** (2018) Anisotropic  
764 growth is achieved through the additive mechanical effect of material anisotropy and  
765 elastic asymmetry. *eLife*. doi: 10.7554/eLife.38161
- 766 **Dedeurwaerder S, Menu-Bouaouiche L, Mareck A, Lerouge P, Guerineau F** (2009)  
767 Activity of an atypical *Arabidopsis thaliana* pectin methylesterase. *Planta* **229**: 311–321
- 768 **Denès JM, Baron A, Renard CMGC, Péan C, Drilleau JF** (2000) Different action patterns  
769 for apple pectin methylesterase at pH 7.0 and 4.5. *Carbohydrate research* **327**: 385–93
- 770 **Dixit S, Upadhyay SK, Singh H, Pandey B, Chandrashekar K, Verma PC** (2013) Pectin  
771 methylesterase of *Datura* species, purification, and characterization from *Datura*  
772 *stramonium* and its application. *Plant Signaling and Behavior*. doi: 10.4161/psb.25681
- 773 **Dolinsky TJ, Nielsen JE, McCammon JA, Baker NA** (2004) PDB2PQR: An automated  
774 pipeline for the setup of Poisson-Boltzmann electrostatics calculations. *Nucleic Acids*  
775 *Research*. doi: 10.1093/nar/gkh381
- 776 **Dorokhov YL, Skurat E V., Frolova OYu, Gasanova T V., Ivanov PA, Ravin N V.,**  
777 **Skryabin KG, Mäkinen KM, Klimyuk VI, Gleba YYu, et al** (2006) Role of the

- 778 leader sequence in tobacco pectin methylesterase secretion. FEBS Letters **580**: 3329–  
779 3334
- 780 **Downie B, Dirk LMA, Hadfield KA, Wilkins TA, Bennett AB, Bradford KJ** (1998) A gel  
781 diffusion assay for quantification of pectin methylesterase activity. Analytical  
782 biochemistry **264**: 149–157
- 783 **Duvetter T, Fraeye I, Sila DN, Verlent I, Smout C, Hendrickx M, Van Loey A** (2006)  
784 Mode of De-esterification of Alkaline and Acidic Pectin Methyl Esterases at Different  
785 pH Conditions. Journal of Agricultural and Food Chemistry **54**: 7825–7831
- 786 **Fendrych M, Leung J, Friml J** (2016) TIR1/AFB-Aux/IAA auxin perception mediates  
787 rapid cell wall acidification and growth of Arabidopsis hypocotyls. eLife **5**: e19048
- 788 **Francoz E, Ranocha P, Le Ru A, Martinez Y, Fourquaux I, Jauneau A, Dunand C,**  
789 **Burlat V** (2019) Pectin Demethylesterification Generates Platforms that Anchor  
790 Peroxidases to Remodel Plant Cell Wall Domains. Developmental Cell **48**: 261-276.e8
- 791 **Fries M, Ihrig J, Brocklehurst K, Shevchik VE, Pickersgill RW** (2007) Molecular basis of  
792 the activity of the phytopathogen pectin methylesterase. The EMBO Journal **26**: 3879–  
793 3887
- 794 **Goldberg R, Morvan C, Jauneau A, Jarvis MC** (1996) Methyl-esterification, de-  
795 esterification and gelation of pectins in the primary cell wall. Progress in Biotechnology  
796 **14**: 151–172
- 797 **Hervé V, Duruflé H, San Clemente H, Albenne C, Balliau T, Zivy M, Dunand C, Jamet**  
798 **E** (2016) An enlarged cell wall proteome of *Arabidopsis thaliana* rosettes.  
799 PROTEOMICS **16**: 3183–3187
- 800 **Hewezi T, Howe P, Maier TR, Hussey RS, Mitchum MG, Davis EL, Baum TJ** (2008)  
801 Cellulose binding protein from the parasitic nematode *Heterodera schachtii* interacts  
802 with Arabidopsis pectin methylesterase: cooperative cell wall modification during  
803 parasitism. The Plant cell **20**: 3080–93
- 804 **Hocq L, Guinand S, Habrylo O, Voxeur A, Tabi W, Safran J, Fournet F, Domon J-M,**  
805 **Mollet J-C, Pilard S, et al** (2020) The exogenous application of AtPGLR, an endo-  
806 polygalacturonase, triggers pollen tube burst and repair. The Plant Journal. doi:  
807 10.1111/tpj.14753
- 808 **Hocq L, Pelloux J, Lefebvre V** (2017a) Connecting Homogalacturonan-Type Pectin  
809 Remodeling to Acid Growth. Trends in Plant Science **22**: 20–29
- 810 **Hocq L, Sénéchal F, Lefebvre V, Lehner A, Domon J-M, Mollet J-C, Dehors J, Pageau**  
811 **K, Marcelo P, Guérineau F, et al** (2017b) Combined Experimental and Computational  
812 Approaches Reveal Distinct pH Dependence of Pectin Methylesterase Inhibitors. Plant  
813 Physiology **173**: 1075–1093
- 814 **Hruz T, Laule O, Szabo G, Wessendorp F, Bleuler S, Oertle L, Widmayer P, Gruissem**  
815 **W, Zimmermann P** (2008) Genevestigator V3: A Reference Expression Database for  
816 the Meta-Analysis of Transcriptomes. Advances in Bioinformatics **2008**: 420747
- 817 **Johansson K, El-Ahmad M, Friemann R, Jörnvall H, Markovič O, Eklund H** (2002)  
818 Crystal structure of plant pectin methylesterase. FEBS Letters **514**: 243–249
- 819 **Jolie RP, Duvetter T, Van Loey AM, Hendrickx ME** (2010) Pectin methylesterase and its  
820 proteinaceous inhibitor: A review. Carbohydrate Research **345**: 2583–2595
- 821 **Kent LM, Loo TS, Melton LD, Mercadante D, Williams MAK, Jameson GB** (2016)  
822 Structure and properties of a non-processive, salt-requiring, and acidophilic pectin  
823 methylesterase from aspergillus Niger provide insights into the key determinants of  
824 processivity control. Journal of Biological Chemistry **291**: 1289–1306
- 825 **Kumpf RP, Shi C-L, Larrieu A, Sto IM, Butenko MA, Peret B, Riiser ES, Bennett MJ,**  
826 **Aalen RB** (2013) Floral organ abscission peptide IDA and its HAE/HSL2 receptors

- 827 control cell separation during lateral root emergence. Proceedings of the National  
828 Academy of Sciences **110**: 5235–5240
- 829 **Leroux C, Bouton S, Kiefer-Meyer M-C, Fabrice TN, Mareck A, Guénin S, Fournet F,**  
830 **Ringli C, Pelloux J, Driouich A, et al** (2015) PECTIN METHYLESTERASE48 Is  
831 Involved in Arabidopsis Pollen Grain Germination. Plant Physiology **167**: 367–380
- 832 **Lin T-P, Liu C-C, Chen S-W, Wang W-Y** (1989) Purification and Characterization of  
833 Pectinmethylesterase from *Ficus awkeotsang* Makino Achenes . Plant Physiology **91**:  
834 1445–1453
- 835 **Malamy JE, Benfey PN** (1997) <Malamy benfey paper.pdf>. **44**: 33–44
- 836 **Markovič O, Janeček Š** (2004) Pectin methylesterases: Sequence-structural features and  
837 phylogenetic relationships. Carbohydrate Research **339**: 2281–2295
- 838 **Markovič O, Kohn R** (1984) Mode of pectin deesterification by *Trichoderma reesei*  
839 pectinesterase. Experientia **40**: 842–843
- 840 **Mercadante D, Melton LD, Jameson GB, Williams MAK** (2014) Processive pectin  
841 methylesterases: the role of electrostatic potential, breathing motions and bond cleavage  
842 in the rectification of Brownian motions. PloS one **9**: e87581
- 843 **Mercadante D, Melton LD, Jameson GB, Williams MAK, De Simone A** (2013) Substrate  
844 dynamics in enzyme action: Rotations of monosaccharide subunits in the binding groove  
845 are essential for pectin methylesterase processivity. Biophysical Journal **104**: 1731–1739
- 846 **Micheli F** (2001) Pectin methylesterases: Cell wall enzymes with important roles in plant  
847 physiology. Trends in Plant Science **6**: 414–419
- 848 **Milani P, Gholamirad M, Traas J, Arnéodo A, Boudaoud A, Argoul F, Hamant O**  
849 (2011) In vivo analysis of local wall stiffness at the shoot apical meristem in  
850 Arabidopsis using atomic force microscopy. Plant Journal **67**: 1116–1123
- 851 **Nguyen-Kim H, San Clemente H, Balliau T, Zivy M, Dunand C, Albenne C, Jamet E**  
852 (2016) *Arabidopsis thaliana* root cell wall proteomics: Increasing the proteome  
853 coverage using a combinatorial peptide ligand library and description of unexpected  
854 Hyp in peroxidase amino acid sequences. PROTEOMICS **16**: 491–503
- 855 **Peaucelle A, Braybrook SA, Le Guillou L, Bron E, Kuhlemeier C, Höfte H** (2011a)  
856 Pectin-Induced Changes in Cell Wall Mechanics Underlie Organ Initiation in  
857 Arabidopsis. Current Biology **21**: 1720–1726
- 858 **Peaucelle A, Louvet R, Johansen JN, Höfte H, Laufs P, Pelloux J, Mouille G** (2008)  
859 Arabidopsis phyllotaxis is controlled by the methyl-esterification status of cell-wall  
860 pectins. Current biology : CB **18**: 1943–8
- 861 **Peaucelle A, Louvet R, Johansen JN, Salsac F, Morin H, Fournet F, Belcram K, Gillet**  
862 **F, Höfte H, Laufs P** (2011b) The transcription factor BELLRINGER modulates  
863 phyllotaxis by regulating the expression of a pectin methylesterase in Arabidopsis.  
864 Development **138**: 4733–4741
- 865 **Peaucelle A, Wightman R, Höfte H** (2015) The Control of Growth Symmetry Breaking in  
866 the Arabidopsis Hypocotyl. Current Biology **25**: 1746–1752
- 867 **Pelletier S, Van Orden J, Wolf S, Vissenberg K, Delacourt J, Ndong YA, Pelloux J,**  
868 **Bischoff V, Urbain A, Mouille G, et al** (2010) A role for pectin de-methylesterification  
869 in a developmentally regulated growth acceleration in dark-grown Arabidopsis  
870 hypocotyls. New Phytologist **188**: 726–739
- 871 **Pelloux J, Rustérucci C, Mellerowicz EJ** (2007) New insights into pectin methylesterase  
872 structure and function. Trends in Plant Science **12**: 267–277
- 873 **Peng CC, Hsiao ESL, Ding JLC, Tzen JTC** (2005) Functional expression in *Pichia pastoris*  
874 of an acidic pectin methylesterase from jelly fig (*Ficus awkeotsang*). Journal of  
875 Agricultural and Food Chemistry **53**: 5612–5616

- 876 **Refrégier G, Pelletier S, Jaillard D, Höfte H** (2004) Interaction between wall deposition  
877 and cell elongation in dark-grown hypocotyl cells in *Arabidopsis*. *Plant Physiology* **135**:  
878 959–968
- 879 **Ren C, Kermode AR** (2000) An increase in pectin methyl esterase activity accompanies  
880 dormancy breakage and germination of yellow cedar seeds. *Plant Physiology* **124**: 231–  
881 242
- 882 **Ridley BL, O’Neill MA, Mohnen D** (2001) Pectins: Structure, biosynthesis, and  
883 oligogalacturonide-related signaling. *Phytochemistry* **57**: 929–967
- 884 **Safran J, Habrylo O, Cherkaoui M, Lecomte S, Voxeur A, Pilard S, Bassard S, Pau-  
885 Roblot C, Mercadante D, Pelloux J, et al** (2021) New insights into the specificity and  
886 processivity of two novel pectinases from *Verticillium dahliae*. doi:  
887 10.1016/j.ijbiomac.2021.02.035
- 888 **Salamin K, Sriranganadane D, Léchenne B, Jousson O** (2010) Endogenous Secreted  
889 Subtilisin in *Pichia pastoris* GS115 and KM71 Strains 1 2. doi: 10.1128/AEM.00412-10
- 890 **San Clemente H, Jamet E** (2015) WallProtDB, a database resource for plant cell wall  
891 proteomics. *Plant Methods* **11**: 1–7
- 892 **Savary BJ** (2001) Perfusion chromatography separation of the tomato fruit-specific pectin  
893 methylesterase from a semipurified commercial enzyme preparation. *Preparative  
894 Biochemistry and Biotechnology* **31**: 241–258
- 895 **Savary BJ, Vasu P, Cameron RG, McCollum TG, Nuñez A** (2013) Structural  
896 Characterization of the Thermally Tolerant Pectin Methylesterase Purified from *Citrus  
897 sinensis* Fruit and Its Gene Sequence. *Journal of Agricultural and Food Chemistry* **61**:  
898 12711–12719
- 899 **Savary BJ, Vasu P, Nunez A, Cameron RG** (2010) Identification of thermolabile pectin  
900 methylesterases from sweet orange fruit by peptide mass fingerprinting. *Journal of  
901 Agricultural and Food Chemistry* **58**: 12462–12468
- 902 **Sénéchal F, Graff L, Surcouf O, Marcelo P, Rayon C, Bouton S, Mareck A, Mouille G,  
903 Stintzi A, Höfte H, et al** (2014a) *Arabidopsis* PECTIN METHYLESTERASE17 is co-  
904 expressed with and processed by SBT3.5, a subtilisin-like serine protease. *Annals of  
905 Botany* **114**: 1161–1175
- 906 **Sénéchal F, L’Enfant M, Domon JM, Rosiau E, Crépeau MJ, Surcouf O, Esquivel-  
907 Rodriguez J, Marcelo P, Mareck A, Guérineau F, et al** (2015) Tuning of pectin  
908 methylesterification: Pectin methylesterase inhibitor 7 modulates the processive activity  
909 of co-expressed pectin methylesterase 3 in a pH-dependent manner. *Journal of Biological  
910 Chemistry* **290**: 23320–23335
- 911 **Sénéchal F, Wattier C, Rustérucci C, Pelloux J** (2014b) Homogalacturonan-modifying  
912 enzymes: Structure, expression, and roles in plants. *Journal of Experimental Botany* **65**:  
913 5125–5160
- 914 **Søndergaard CR, Olsson MHM, Rostkowski M, Jensen JH** (2011) Improved treatment of  
915 ligands and coupling effects in empirical calculation and rationalization of  $pK_a$  values.  
916 *Journal of Chemical Theory and Computation* **7**: 2284–2295
- 917 **Swarup K, Benková E, Swarup R, Casimiro I, Péret B, Yang Y, Parry G, Nielsen E, De  
918 Smet I, Vanneste S, et al** (2008) The auxin influx carrier LAX3 promotes lateral root  
919 emergence. *Nature Cell Biology* **10**: 946–954
- 920 **Thonar C, Liners F, Van Cutsem P** (2006) Polymorphism and modulation of cell wall  
921 esterase enzyme activities in the chicory root during the growing season. *Journal of  
922 Experimental Botany* **57**: 81–89
- 923 **Voxeur A, Habrylo O, Guénin S, Miart F, Soulié MC, Rihouey C, Pau-Roblot C,  
924 Domon JM, Gutierrez L, Pelloux J, et al** (2019) Oligogalacturonide production upon

- 925 Arabidopsis thaliana-Botrytis cinerea interaction. Proceedings of the National Academy  
926 of Sciences of the United States of America **116**: 19743–19752
- 927 **Wachsman G, Zhang J, Moreno-Risueno MA, Anderson CT, Benfey PN** (2020) Cell wall  
928 remodeling and vesicle trafficking mediate the root clock in Arabidopsis. Science (New  
929 York, NY) **370**: 819–823
- 930 **Wade RC, Gabdoulline RR, De Rienzo F** (2001) Protein interaction property similarity  
931 analysis. International Journal of Quantum Chemistry **83**: 122–127
- 932 **Wang J, Cieplak P, Kollman PA** (2000) How Well Does a Restrained Electrostatic  
933 Potential (RESP) Model Perform in Calculating Conformational Energies of Organic  
934 and Biological Molecules? Keywords: additive force field; nonadditive force field;  
935 restrained electrostatic potential (RESP); torsional angle parameterization.
- 936 **Wang X, Wilson L, Cosgrove DJ** (2020) Pectin methylesterase selectively softens the onion  
937 epidermal wall yet reduces acid-induced creep. Journal of experimental botany **71**:  
938 2629–2640
- 939 **Willats WGT, Knox JP, Mikkelsen JD** (2006) Pectin: New insights into an old polymer are  
940 starting to gel. Trends in Food Science and Technology **17**: 97–104
- 941 **Willats WGT, Orfila C, Limberg G, Buchholt HC, Van Alebeek GJWM, Voragen AGJ,**  
942 **Marcus SE, Christensen TMIE, Mikkelsen JD, Murray BS, et al** (2001) Modulation  
943 of the degree and pattern of methyl-esterification of pectic homogalacturonan in plant  
944 cell walls: Implications for pectin methyl esterase action, matrix properties, and cell  
945 adhesion. Journal of Biological Chemistry **276**: 19404–19413
- 946 **Wolf S, Rausch T, Greiner S** (2009) The N-terminal pro region mediates retention of  
947 unprocessed type-I PME in the Golgi apparatus. Plant Journal **58**: 361–375
- 948 **Zheng W, Zhang C, Bell EW, Zhang Y** (2019) I-TASSER gateway: A protein structure and  
949 function prediction server powered by XSEDE. Future Generation Computer Systems  
950 **99**: 73–85
- 951
- 952

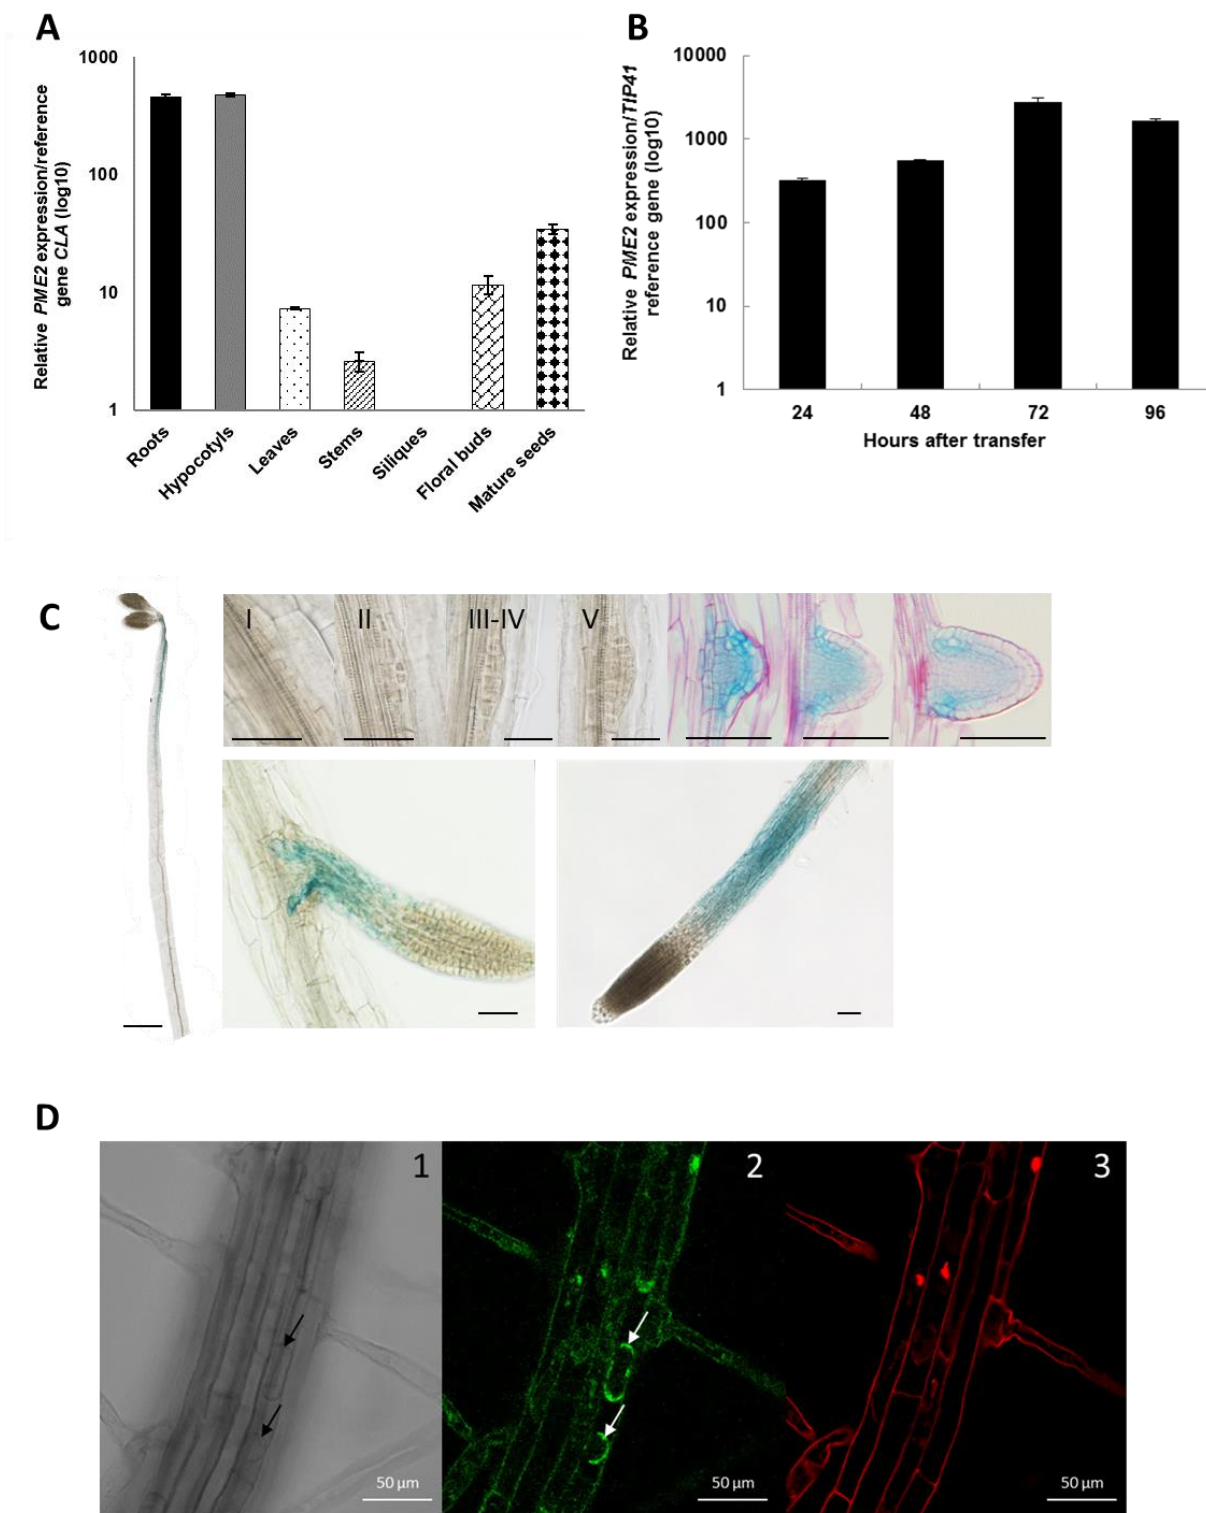

**Figure 1**

953  
954  
955  
956





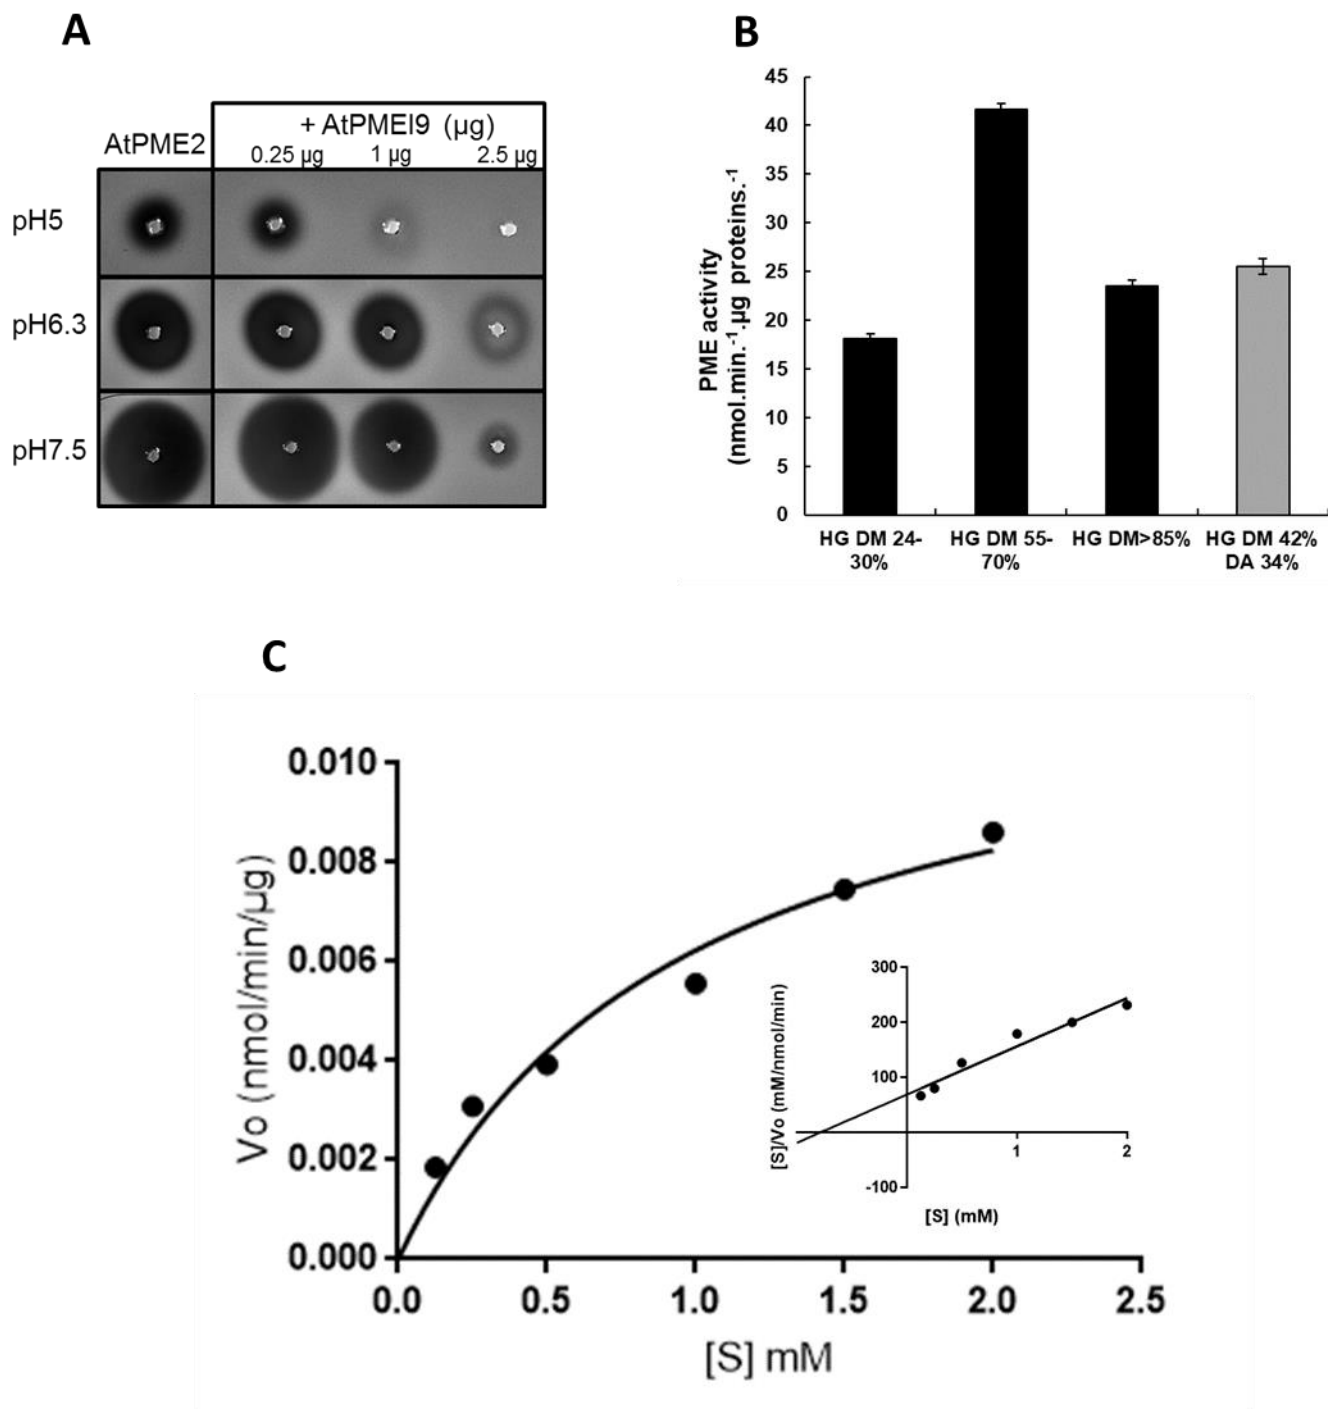

**Figure 3**

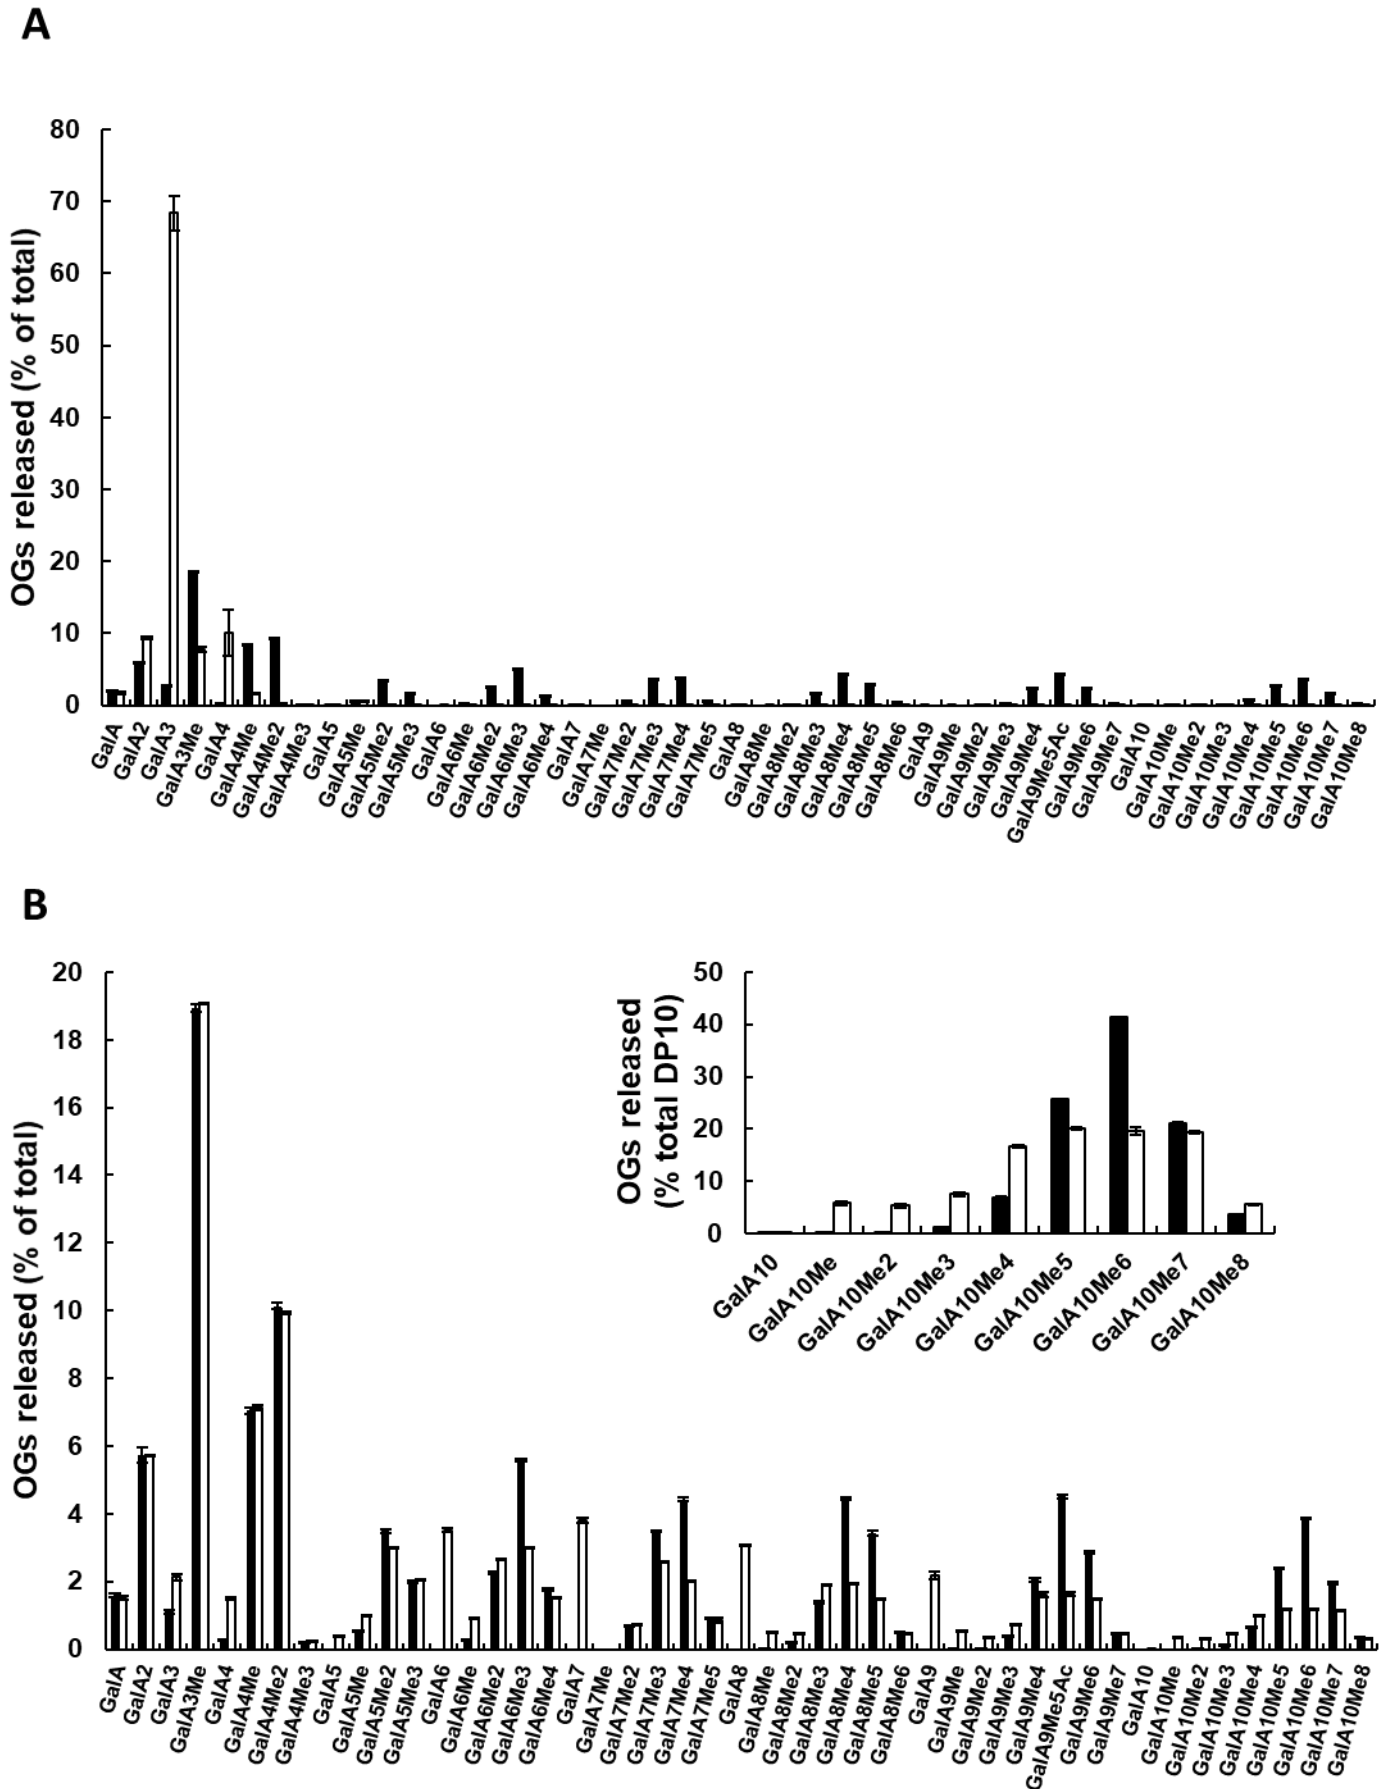

**Figure 4**

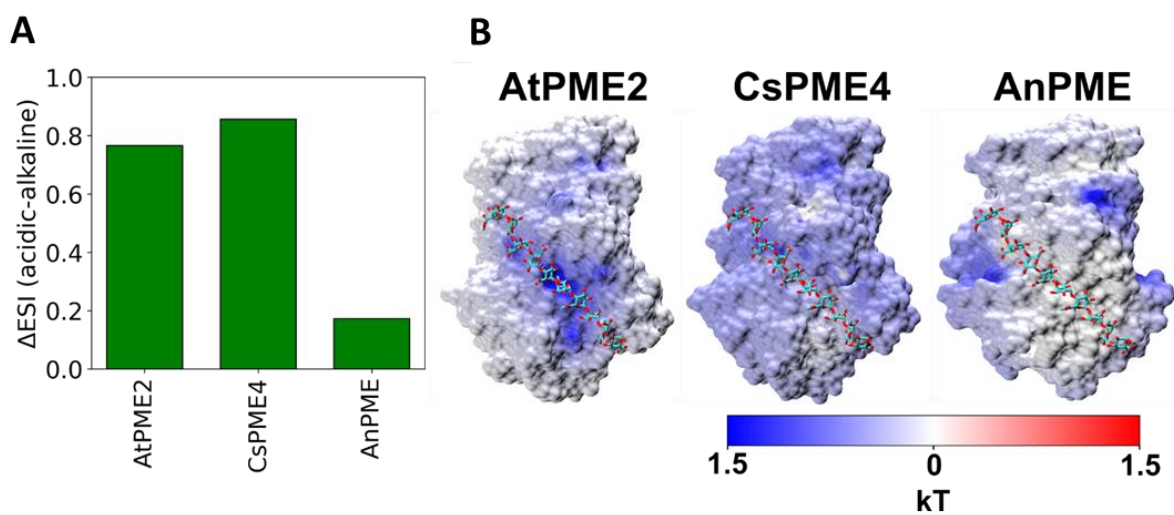

**Figure 5**

960

961

962

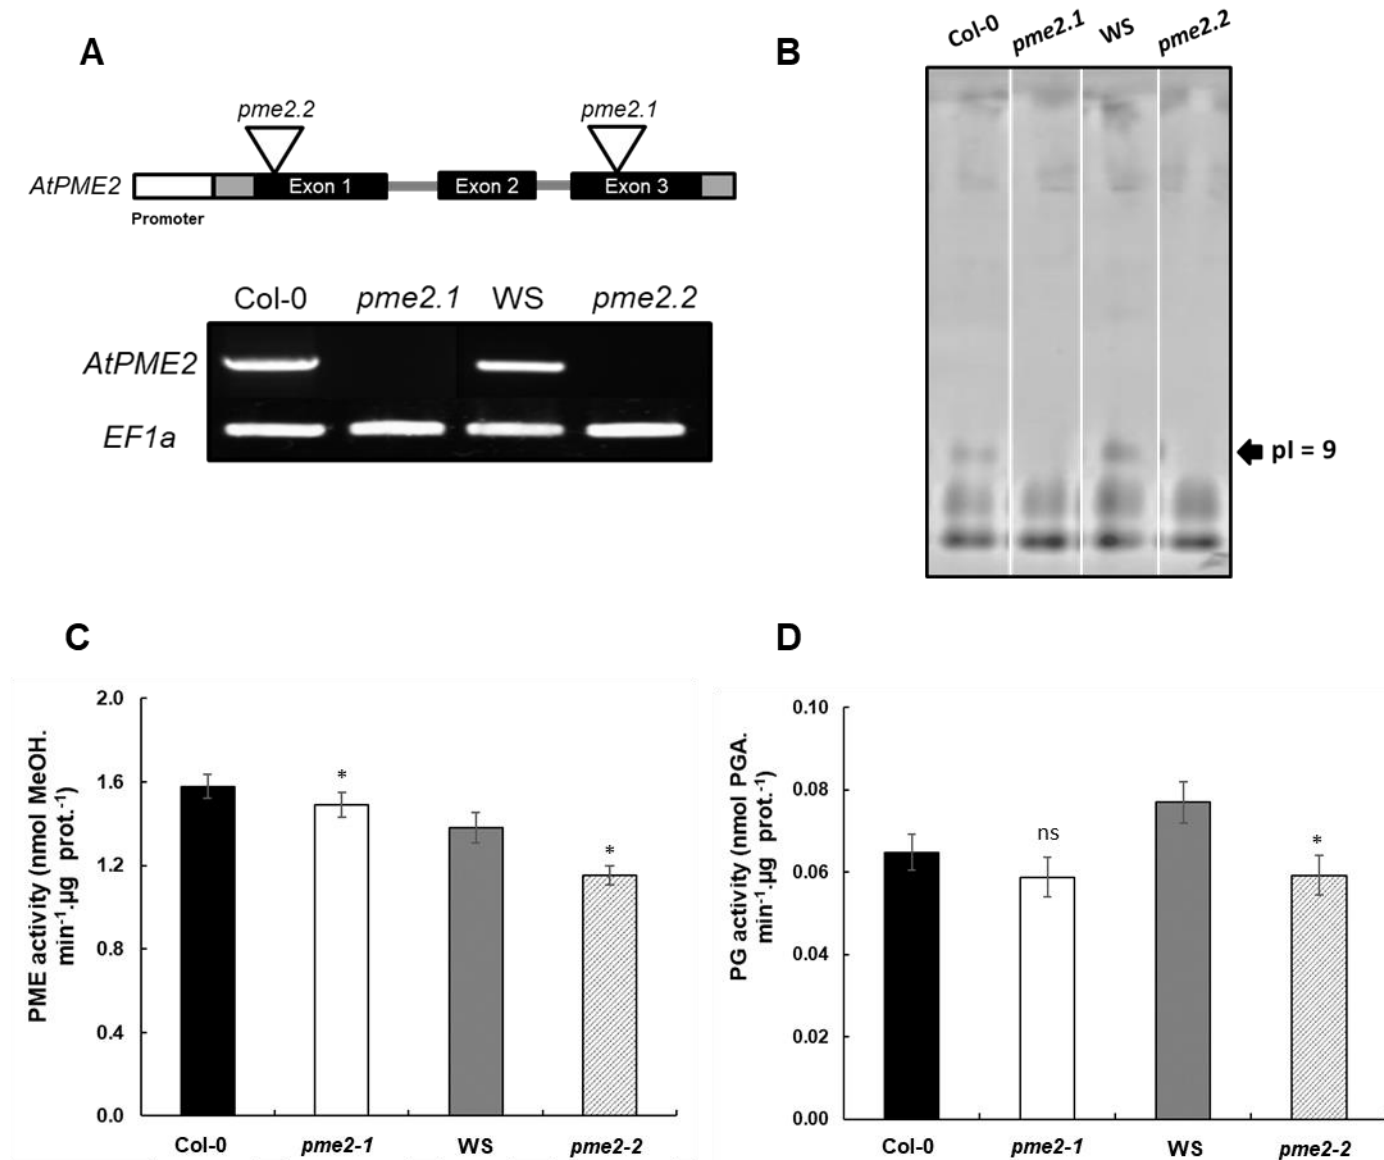

Figure 6

964

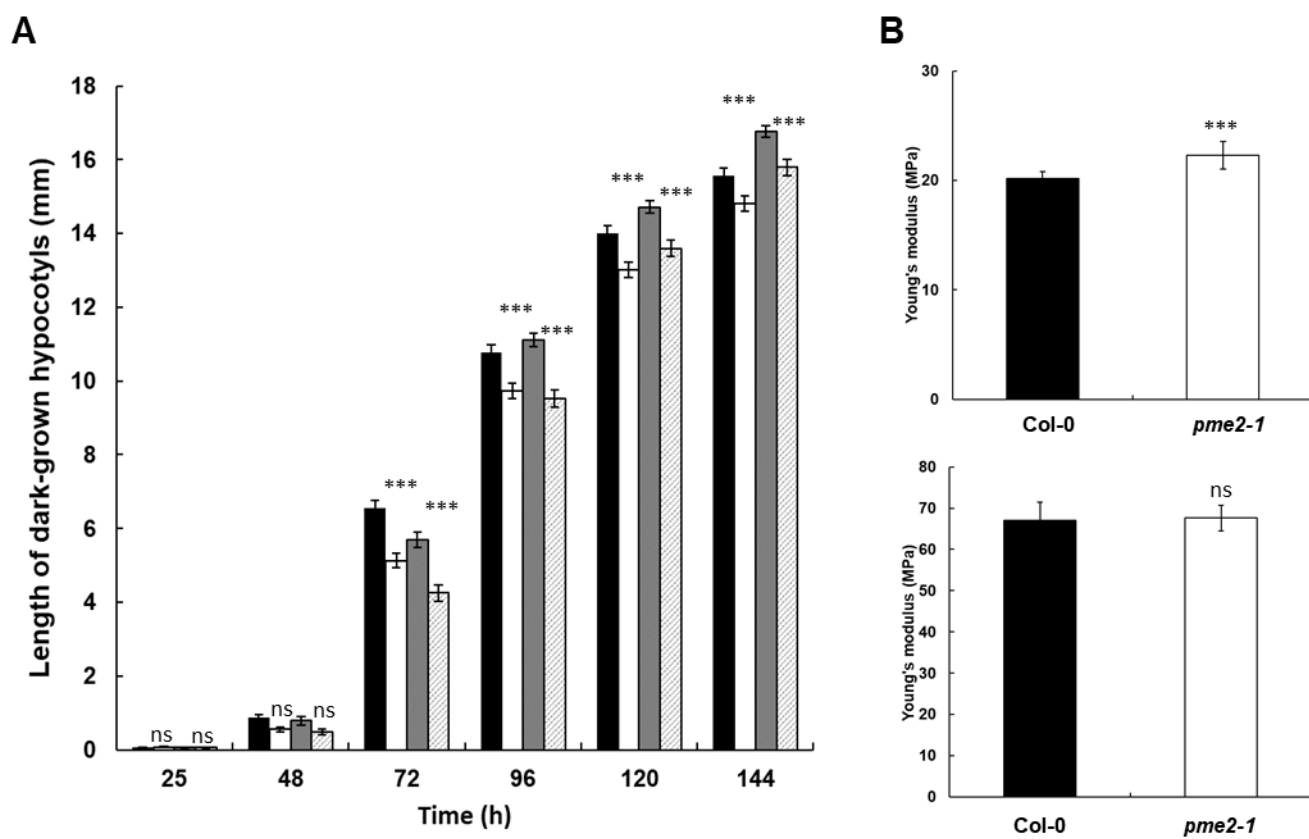

**Figure 7**

965
